# Supplementary material for: Identification of Differentially Expressed Serum Proteins in Infectious Purpura Fulminans
Source: Hindawi journal article supplement (doi:10.1155/2014/698383), 2014-01-01
Supplement: f1 [file 698383.f1.zip]

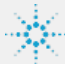

| Spectrum Mill | Summary Settings | Autovalidation | Easy MS/MS | MS/MS Search | Spectrum Summary | Build TIC | Tool Belt | Help |
|---------------|------------------|----------------|------------|--------------|------------------|-----------|-----------|------|
|---------------|------------------|----------------|------------|--------------|------------------|-----------|-----------|------|

Results Shown Filtered by Validation Category: valid

**Data Directory: msdataSM101215TMMU\_HJY**  
hit table read - SpecFeatures read  
valid hits read from tagSummary file - **Files:** 2802 **Hits:** 6420  
**Data Directory: msdataSM101220TMMU\_HJY**  
hit table read - SpecFeatures read  
valid hits read from tagSummary file - **Files:** 1911 **Hits:** 4152  
beginning to assemble proteins .... proteins assembled 1.671875 sec  
proteins filtered by unique peptides 0.496167 sec  
proteins filtered by score  
calculated protein coverage maps 2.159719 sec  
beginning to roll up proteins into groups .... proteins rolled up into groups 1.656199 sec  
protein groups ready for display  
proteinGroupingMethod: oneSharedPeptide  
Mean intensity: sum of intensity for all spectra of peptides belonging to protein / # spectra

| 101215TMMU_HJY<br># spectra<br>mean intensity | 101220TMMU_HJY<br># spectra<br>mean intensity | Protein MW<br>(Da) | Protein<br>pI | Species | Database<br>Accession #     | %AA<br>Coverage    | Distinct<br>Peptides<br>(#) | Distinct<br>Summed<br>MS/MS Search<br>Score | Group<br>#          | Protein Name                                      |
|-----------------------------------------------|-----------------------------------------------|--------------------|---------------|---------|-----------------------------|--------------------|-----------------------------|---------------------------------------------|---------------------|---------------------------------------------------|
| 311<br>4.71e+008                              | 198<br>1.53e+008                              | 187149.1           | 6.02          | HUMAN   | <a href="#">IPI00783987</a> | <a href="#">47</a> | 68                          | 1057.54                                     | <a href="#">1.1</a> | C3 Complement C3 precursor (Fragment)             |
| 283<br>5.11e+008                              | 154<br>1.71e+008                              | 144810.1           | 7.28          | HUMAN   | <a href="#">IPI00887739</a> | <a href="#">48</a> | 54                          | 853.24                                      |                     | LOC100133511 hypothetical protein, partial        |
| 20<br>6.46e+007                               | 28<br>8.08e+007                               | 44929.9            | 4.94          | HUMAN   | <a href="#">IPI00739237</a> | <a href="#">37</a> | 12                          | 167.77                                      |                     | LOC653879 similar to complement component 3       |
| 449<br>5.86e+008                              | 282<br>1.02e+009                              | 163278.8           | 6.00          | HUMAN   | <a href="#">IPI00478003</a> | <a href="#">47</a> | 51                          | 820.26                                      | <a href="#">2.1</a> | A2M Alpha-2-macroglobulin precursor               |
| 105<br>6.57e+008                              | 41<br>4.24e+008                               | 163832.8           | 5.97          | HUMAN   | <a href="#">IPI00025426</a> | <a href="#">6</a>  | 8                           | 129.13                                      |                     | PZP Isoform 1 of Pregnancy zone protein precursor |
| 105<br>6.57e+008                              | 41<br>4.24e+008                               | 140368.5           | 5.90          | HUMAN   | <a href="#">IPI00748437</a> | <a href="#">7</a>  | 8                           | 129.13                                      |                     | PZP Uncharacterized protein PZP                   |
| 105<br>6.57e+008                              | 41<br>4.24e+008                               | 140364.5           | 5.90          | HUMAN   | <a href="#">IPI00884981</a> | <a href="#">7</a>  | 8                           | 129.13                                      |                     | PZP Isoform 2 of Pregnancy zone protein precursor |
| 27<br>4.02e+008                               | 36<br>5.60e+008                               | 18762.7            | 8.77          | HUMAN   | <a href="#">IPI00789547</a> | <a href="#">45</a> | 6                           | 83.02                                       |                     | A2M 19 kDa protein                                |
| 4<br>4.11e+008                                | 1<br>4.46e+007                                | 18723.9            | 6.08          | HUMAN   | <a href="#">IPI00878729</a> | <a href="#">29</a> | 3                           | 43.60                                       |                     | A2M 19 kDa protein                                |
| 17<br>1.11e+008                               | 7<br>1.09e+008                                | 12992.8            | 6.08          | HUMAN   | <a href="#">IPI00796830</a> | <a href="#">42</a> | 3                           | 41.27                                       |                     | A2M 13 kDa protein                                |
| 160<br>5.44e+008                              | 101<br>1.41e+008                              | 515565.2           | 6.61          | HUMAN   | <a href="#">IPI00022229</a> | <a href="#">13</a> | 47                          | 719.71                                      | <a href="#">3.1</a> | APOB Apolipoprotein B-100 precursor               |
| 98<br>2.45e+008                               | 83<br>7.72e+007                               | 192752.5           | 6.89          | HUMAN   | <a href="#">IPI00418163</a> | <a href="#">26</a> | 36                          | 551.13                                      | <a href="#">4.1</a> | C4B complement component 4B preproprotein         |
| 98<br>2.45e+008                               | 83<br>7.72e+007                               | 192749.5           | 6.89          | HUMAN   | <a href="#">IPI00887154</a> | <a href="#">26</a> | 36                          | 551.13                                      |                     | DADB-112B14.11 Complement component 4B            |
| 103<br>2.39e+008                              | 92<br>7.81e+007                               | 192743.5           | 6.66          | HUMAN   | <a href="#">IPI00643525</a> | <a href="#">24</a> | 35                          | 537.05                                      |                     | C4A Complement component 4A                       |
| 98<br>2.54e+008                               | 90<br>7.75e+007                               | 192794.5           | 6.74          | HUMAN   | <a href="#">IPI00654875</a> | <a href="#">24</a> | 34                          | 520.20                                      |                     | C4B Complement C4-B precursor                     |
| 101<br>2.31e+008                              | 91<br>7.88e+007                               | 192786.5           | 6.66          | HUMAN   | <a href="#">IPI00889723</a> | <a href="#">24</a> | 34                          | 519.73                                      |                     | C4A complement component 4A preproprotein         |
| 95<br>2.43e+008                               | 90<br>7.75e+007                               | 192772.5           | 6.66          | HUMAN   | <a href="#">IPI00032258</a> | <a href="#">22</a> | 33                          | 504.01                                      |                     | C4A Complement C4-A precursor                     |
| 7<br>1.94e+008                                | 4<br>1.70e+008                                | 15242.5            | 8.29          | HUMAN   | <a href="#">IPI00843913</a> | <a href="#">33</a> | 4                           | 57.42                                       |                     | C4A ZA protein                                    |

|                  |                  |          |      |       |                             |                    |    |        |                     |                                                       |
|------------------|------------------|----------|------|-------|-----------------------------|--------------------|----|--------|---------------------|-------------------------------------------------------|
| 345<br>4.27e+009 | 210<br>3.97e+009 | 30778.0  | 5.56 | HUMAN | <a href="#">IPI00021841</a> | <a href="#">59</a> | 22 | 372.47 | <a href="#">5.1</a> | APOA1 Apolipoprotein A-I precursor                    |
| 298<br>4.87e+009 | 181<br>4.60e+009 | 27908.7  | 5.80 | HUMAN | <a href="#">IPI00853525</a> | <a href="#">50</a> | 17 | 280.64 |                     | APOA1 Apolipoprotein A1                               |
| 70<br>3.39e+008  | 30<br>2.12e+008  | 139097.3 | 6.21 | HUMAN | <a href="#">IPI00029739</a> | <a href="#">27</a> | 26 | 366.70 | <a href="#">6.1</a> | CFH Isoform 1 of Complement factor H precursor        |
| 24<br>1.76e+008  | 11<br>5.82e+007  | 51034.2  | 6.77 | HUMAN | <a href="#">IPI00218999</a> | <a href="#">26</a> | 9  | 118.79 |                     | CFH Isoform 2 of Complement factor H precursor        |
| 19<br>1.66e+008  | 9<br>4.81e+007   | 43846.0  | 7.67 | HUMAN | <a href="#">IPI00515041</a> | <a href="#">25</a> | 8  | 104.61 |                     | CFH Uncharacterized protein CFH                       |
| 1<br>1.48e+006   | 0<br>0.00e+000   | 37323.5  | 7.72 | HUMAN | <a href="#">IPI00027507</a> | <a href="#">3</a>  | 1  | 11.56  |                     | CFHR3 Complement factor H-related protein 3 precursor |
| 1<br>1.48e+006   | 0<br>0.00e+000   | 26120.0  | 8.37 | HUMAN | <a href="#">IPI00844262</a> | <a href="#">4</a>  | 1  | 11.56  |                     | CFHR3 CFHR3 protein                                   |
| 1<br>1.48e+006   | 0<br>0.00e+000   | 22240.5  | 7.92 | HUMAN | <a href="#">IPI00654723</a> | <a href="#">5</a>  | 1  | 11.56  |                     | CFHR3 CFHR3 protein                                   |
| 139<br>1.02e+009 | 99<br>6.17e+008  | 51676.7  | 6.55 | HUMAN | <a href="#">IPI00022488</a> | <a href="#">51</a> | 21 | 318.14 | <a href="#">7.1</a> | HPX Hemopexin precursor                               |
| 57<br>2.38e+008  | 10<br>4.43e+008  | 262607.9 | 5.45 | HUMAN | <a href="#">IPI00022418</a> | <a href="#">12</a> | 19 | 267.96 | <a href="#">8.1</a> | FN1 Isoform 1 of Fibronectin precursor                |
| 57<br>2.38e+008  | 10<br>4.43e+008  | 259199.2 | 5.47 | HUMAN | <a href="#">IPI00339223</a> | <a href="#">12</a> | 19 | 267.96 |                     | FN1 Isoform 3 of Fibronectin precursor                |
| 57<br>2.38e+008  | 10<br>4.43e+008  | 256513.2 | 5.53 | HUMAN | <a href="#">IPI00414283</a> | <a href="#">12</a> | 19 | 267.96 |                     | FN1 fibronectin 1 isoform 4 preproprotein             |
| 57<br>2.38e+008  | 10<br>4.43e+008  | 252794.2 | 5.61 | HUMAN | <a href="#">IPI00339228</a> | <a href="#">12</a> | 19 | 267.96 |                     | FN1 Isoform 8 of Fibronectin precursor                |
| 57<br>2.38e+008  | 10<br>4.43e+008  | 249385.5 | 5.64 | HUMAN | <a href="#">IPI00855777</a> | <a href="#">12</a> | 19 | 267.96 |                     | FN1 Isoform 14 of Fibronectin precursor               |
| 57<br>2.38e+008  | 10<br>4.43e+008  | 243317.5 | 5.48 | HUMAN | <a href="#">IPI00339225</a> | <a href="#">13</a> | 19 | 267.96 |                     | FN1 Isoform 5 of Fibronectin precursor                |
| 57<br>2.38e+008  | 10<br>4.43e+008  | 239609.4 | 5.58 | HUMAN | <a href="#">IPI00479723</a> | <a href="#">13</a> | 19 | 267.96 |                     | FN1 Isoform 10 of Fibronectin precursor               |
| 56<br>2.27e+008  | 10<br>4.43e+008  | 272303.7 | 5.30 | HUMAN | <a href="#">IPI00855785</a> | <a href="#">10</a> | 18 | 256.86 |                     | FN1 Isoform 15 of Fibronectin precursor               |
| 56<br>2.27e+008  | 10<br>4.43e+008  | 268895.0 | 5.32 | HUMAN | <a href="#">IPI00339227</a> | <a href="#">10</a> | 18 | 256.86 |                     | FN1 Isoform 7 of Fibronectin precursor                |
| 56<br>2.27e+008  | 10<br>4.43e+008  | 266209.0 | 5.36 | HUMAN | <a href="#">IPI00845263</a> | <a href="#">10</a> | 18 | 256.86 |                     | FN1 fibronectin 1 isoform 2 preproprotein             |
| 56<br>2.27e+008  | 10<br>4.43e+008  | 262389.7 | 5.37 | HUMAN | <a href="#">IPI00339319</a> | <a href="#">11</a> | 18 | 256.86 |                     | FN1 Isoform 11 of Fibronectin precursor               |
| 56<br>2.27e+008  | 10<br>4.43e+008  | 249305.3 | 5.39 | HUMAN | <a href="#">IPI00867588</a> | <a href="#">11</a> | 18 | 256.86 |                     | FN1 Isoform 13 of Fibronectin precursor               |
| 54<br>2.32e+008  | 10<br>4.43e+008  | 221274.8 | 5.78 | HUMAN | <a href="#">IPI00556632</a> | <a href="#">12</a> | 17 | 244.13 |                     | FN1 Isoform 12 of Fibronectin precursor               |
| 49<br>2.44e+008  | 10<br>4.43e+008  | 262554.9 | 5.38 | HUMAN | <a href="#">IPI00873210</a> | <a href="#">10</a> | 17 | 237.72 |                     | FN1 263 kDa protein                                   |
| 47<br>2.71e+008  | 9<br>4.86e+008   | 240478.2 | 5.44 | HUMAN | <a href="#">IPI00339226</a> | <a href="#">11</a> | 17 | 236.29 |                     | FN1 Isoform 6 of Fibronectin precursor                |
| 44<br>2.84e+008  | 9<br>4.86e+008   | 222944.9 | 5.43 | HUMAN | <a href="#">IPI00339224</a> | <a href="#">12</a> | 16 | 220.27 |                     | FN1 Isoform 4 of Fibronectin precursor                |
| 11<br>2.10e+008  | 1<br>5.54e+007   | 37341.2  | 6.66 | HUMAN | <a href="#">IPI00856050</a> | <a href="#">9</a>  | 2  | 28.57  |                     | - Fibronectin splice variant F (Fragment)             |
| 4<br>2.23e+008   | 0<br>0.00e+000   | 71943.6  | 6.57 | HUMAN | <a href="#">IPI00411462</a> | <a href="#">4</a>  | 2  | 25.83  |                     | FN1 Isoform 2 of Fibronectin precursor                |
| 101<br>4.97e+008 | 71<br>4.57e+008  | 122205.8 | 5.44 | HUMAN | <a href="#">IPI00017601</a> | <a href="#">19</a> | 15 | 233.04 | <a href="#">9.1</a> | CP Ceruloplasmin precursor                            |

|                 |                  |          |      |       |                             |                    |    |        |                      |                                                                                                                                                                              |
|-----------------|------------------|----------|------|-------|-----------------------------|--------------------|----|--------|----------------------|------------------------------------------------------------------------------------------------------------------------------------------------------------------------------|
| 62<br>3.32e+008 | 48<br>1.08e+008  | 97069.2  | 5.31 | HUMAN | <a href="#">IPI00794184</a> | <a href="#">15</a> | 9  | 141.10 |                      | CP 97 kDa protein                                                                                                                                                            |
| 41<br>4.52e+008 | 23<br>1.14e+008  | 20193.9  | 5.27 | HUMAN | <a href="#">IPI00793108</a> | <a href="#">28</a> | 3  | 54.89  |                      | CP 20 kDa protein                                                                                                                                                            |
| 7<br>7.03e+007  | 0<br>0.00e+000   | 20030.9  | 7.10 | HUMAN | <a href="#">IPI00879084</a> | <a href="#">14</a> | 2  | 24.64  |                      | CP 20 kDa protein                                                                                                                                                            |
| 87<br>8.21e+008 | 123<br>2.09e+008 | 50598.5  | 5.42 | HUMAN | <a href="#">IPI00550991</a> | <a href="#">30</a> | 14 | 210.45 | <a href="#">10.1</a> | SERPINA3 Alpha-1-antichymotrypsin precursor                                                                                                                                  |
| 87<br>8.21e+008 | 123<br>2.09e+008 | 47651.1  | 5.33 | HUMAN | <a href="#">IPI00847635</a> | <a href="#">31</a> | 14 | 210.45 |                      | SERPINA3 Isoform 1 of Alpha-1-antichymotrypsin precursor                                                                                                                     |
| 28<br>4.58e+008 | 21<br>1.44e+008  | 45399.3  | 5.28 | HUMAN | <a href="#">IPI00304273</a> | <a href="#">37</a> | 14 | 203.47 | <a href="#">11.1</a> | APOA4 Apolipoprotein A-IV precursor                                                                                                                                          |
| 28<br>4.58e+008 | 21<br>1.44e+008  | 45372.2  | 5.28 | HUMAN | <a href="#">IPI00847179</a> | <a href="#">37</a> | 14 | 203.47 |                      | APOA4 apolipoprotein A-IV precursor                                                                                                                                          |
| 41<br>4.52e+008 | 18<br>6.89e+007  | 47901.5  | 6.29 | HUMAN | <a href="#">IPI00797833</a> | <a href="#">37</a> | 14 | 193.16 | <a href="#">12.1</a> | KNG1 Kininogen 1                                                                                                                                                             |
| 40<br>4.63e+008 | 18<br>6.89e+007  | 71957.8  | 6.34 | HUMAN | <a href="#">IPI00032328</a> | <a href="#">22</a> | 13 | 184.44 |                      | KNG1 Isoform HMW of Kininogen-1 precursor                                                                                                                                    |
| 40<br>4.63e+008 | 18<br>6.89e+007  | 47883.5  | 6.29 | HUMAN | <a href="#">IPI00215894</a> | <a href="#">34</a> | 13 | 184.44 |                      | KNG1 Isoform LMW of Kininogen-1 precursor                                                                                                                                    |
| 35<br>5.23e+008 | 14<br>5.22e+007  | 33085.6  | 6.27 | HUMAN | <a href="#">IPI00789376</a> | <a href="#">36</a> | 10 | 153.01 |                      | KNG1 KNG1 protein                                                                                                                                                            |
| 5<br>4.18e+007  | 4<br>1.27e+008   | 17352.6  | 4.83 | HUMAN | <a href="#">IPI00797097</a> | <a href="#">25</a> | 3  | 31.43  |                      | KNG1 17 kDa protein                                                                                                                                                          |
| 28<br>4.85e+008 | 11<br>3.76e+007  | 188306.3 | 6.11 | HUMAN | <a href="#">IPI00032291</a> | <a href="#">10</a> | 13 | 176.86 | <a href="#">13.1</a> | C5 Complement C5 precursor                                                                                                                                                   |
| 6<br>9.07e+006  | 5<br>2.24e+007   | 123352.0 | 8.43 | HUMAN | <a href="#">IPI00816741</a> | <a href="#">8</a>  | 7  | 84.75  |                      | C5 Complement component 5 variant (Fragment)                                                                                                                                 |
| 18<br>7.66e+007 | 30<br>7.74e+007  | 52917.9  | 5.32 | HUMAN | <a href="#">IPI00742696</a> | <a href="#">25</a> | 11 | 161.86 | <a href="#">14.1</a> | GC vitamin D-binding protein precursor                                                                                                                                       |
| 17<br>7.01e+007 | 27<br>7.00e+007  | 52964.0  | 5.40 | HUMAN | <a href="#">IPI00555812</a> | <a href="#">22</a> | 9  | 134.01 |                      | GC Vitamin D-binding protein precursor                                                                                                                                       |
| 81<br>7.39e+008 | 22<br>4.07e+008  | 52691.8  | 6.12 | HUMAN | <a href="#">IPI00032179</a> | <a href="#">27</a> | 10 | 158.91 | <a href="#">15.1</a> | SERPINC1 Antithrombin III variant                                                                                                                                            |
| 44<br>6.12e+008 | 6<br>5.86e+008   | 29092.6  | 9.03 | HUMAN | <a href="#">IPI00844156</a> | <a href="#">20</a> | 4  | 65.89  |                      | SERPINC1 SERPINC1 protein                                                                                                                                                    |
| 38<br>2.23e+008 | 12<br>1.37e+008  | 90569.6  | 7.04 | HUMAN | <a href="#">IPI00019580</a> | <a href="#">19</a> | 11 | 153.65 | <a href="#">16.1</a> | PLG Plasminogen precursor                                                                                                                                                    |
| 74<br>4.55e+008 | 20<br>1.03e+008  | 59578.6  | 7.09 | HUMAN | <a href="#">IPI00022371</a> | <a href="#">27</a> | 10 | 152.35 | <a href="#">17.1</a> | HRG Histidine-rich glycoprotein precursor                                                                                                                                    |
| 34<br>3.15e+008 | 6<br>1.29e+008   | 70037.3  | 5.64 | HUMAN | <a href="#">IPI00019568</a> | <a href="#">22</a> | 10 | 148.29 | <a href="#">18.1</a> | F2 Prothrombin precursor (Fragment)                                                                                                                                          |
| 16<br>2.06e+008 | 2<br>4.92e+007   | 35931.8  | 4.74 | HUMAN | <a href="#">IPI00877967</a> | <a href="#">15</a> | 3  | 51.54  |                      | F2 36 kDa protein                                                                                                                                                            |
| 27<br>1.80e+008 | 17<br>2.13e+008  | 55154.5  | 6.09 | HUMAN | <a href="#">IPI00291866</a> | <a href="#">20</a> | 9  | 147.70 | <a href="#">19.1</a> | SERPING1 Plasma protease C1 inhibitor precursor                                                                                                                              |
| 23<br>1.88e+008 | 16<br>2.24e+008  | 37288.2  | 7.91 | HUMAN | <a href="#">IPI00556459</a> | <a href="#">27</a> | 8  | 133.67 |                      | SERPING1 Serine/cysteine proteinase inhibitor clade G member 1 splice variant 2 (Fragment)                                                                                   |
| 25<br>1.89e+008 | 16<br>2.23e+008  | 59492.4  | 6.28 | HUMAN | <a href="#">IPI00879931</a> | <a href="#">16</a> | 8  | 127.12 |                      | SERPING1 cDNA FLJ78023, highly similar to Homo sapiens serine (or cysteine) proteinase inhibitor, clade G (C1inhibitor), member 1, (angioedema, hereditary) (SERPING1), mRNA |
| 4<br>1.33e+008  | 1<br>4.69e+007   | 18153.4  | 4.48 | HUMAN | <a href="#">IPI00877698</a> | <a href="#">5</a>  | 1  | 14.03  |                      | SERPING1 18 kDa protein                                                                                                                                                      |
| 4<br>1.33e+008  | 1<br>4.69e+007   | 11785.3  | 4.94 | HUMAN | <a href="#">IPI00385045</a> | <a href="#">8</a>  | 1  | 14.03  |                      | SERPING1 C1 inhibitor mutant (Fragment)                                                                                                                                      |

|                 |                 |          |      |       |                             |                    |    |        |                      |                                                                                              |
|-----------------|-----------------|----------|------|-------|-----------------------------|--------------------|----|--------|----------------------|----------------------------------------------------------------------------------------------|
| 28<br>2.40e+008 | 10<br>3.87e+008 | 103325.9 | 6.51 | HUMAN | <a href="#">IPI00294193</a> | <a href="#">11</a> | 10 | 140.65 | <a href="#">20.1</a> | ITIH4 Isoform 1 of Inter-alpha-trypsin inhibitor heavy chain H4 precursor                    |
| 27<br>2.49e+008 | 10<br>3.87e+008 | 101209.5 | 6.21 | HUMAN | <a href="#">IPI00218192</a> | <a href="#">10</a> | 9  | 132.43 |                      | ITIH4 Isoform 2 of Inter-alpha-trypsin inhibitor heavy chain H4 precursor                    |
| 27<br>2.49e+008 | 10<br>3.87e+008 | 84248.7  | 5.31 | HUMAN | <a href="#">IPI00878609</a> | <a href="#">12</a> | 9  | 132.43 |                      | ITIH4 Protein                                                                                |
| 14<br>2.08e+008 | 5<br>3.68e+008  | 70953.5  | 5.43 | HUMAN | <a href="#">IPI00878152</a> | <a href="#">10</a> | 6  | 88.78  |                      | ITIH4 71 kDa protein                                                                         |
| 11<br>1.92e+008 | 5<br>4.06e+008  | 15749.3  | 9.49 | HUMAN | <a href="#">IPI00556036</a> | <a href="#">7</a>  | 2  | 34.93  |                      | ITIH4 Inter-alpha (Globulin) inhibitor H4 (Plasma Kallikrein-sensitive glycoprotein) variant |
| 20<br>1.93e+009 | 22<br>3.12e+008 | 85533.4  | 6.67 | HUMAN | <a href="#">IPI00019591</a> | <a href="#">17</a> | 9  | 140.04 | <a href="#">21.1</a> | CFB Isoform 1 of Complement factor B precursor (Fragment)                                    |
| 12<br>1.98e+008 | 15<br>1.31e+008 | 85534.3  | 6.44 | HUMAN | <a href="#">IPI00639937</a> | <a href="#">15</a> | 8  | 125.77 |                      | CFB Complement factor B                                                                      |
| 5<br>3.27e+008  | 11<br>1.47e+008 | 68872.9  | 6.11 | HUMAN | <a href="#">IPI00218508</a> | <a href="#">7</a>  | 3  | 54.90  |                      | CFB Isoform 2 of Complement factor B precursor (Fragment)                                    |
| 41<br>2.63e+008 | 6<br>1.12e+008  | 85697.9  | 5.90 | HUMAN | <a href="#">IPI00026314</a> | <a href="#">16</a> | 8  | 128.28 | <a href="#">22.1</a> | GSN Isoform 1 of Gelsolin precursor                                                          |
| 41<br>2.63e+008 | 6<br>1.12e+008  | 80641.0  | 5.58 | HUMAN | <a href="#">IPI00646773</a> | <a href="#">17</a> | 8  | 128.28 |                      | GSN Isoform 2 of Gelsolin precursor                                                          |
| 30<br>2.09e+008 | 4<br>1.27e+008  | 52373.1  | 5.21 | HUMAN | <a href="#">IPI00513782</a> | <a href="#">21</a> | 6  | 90.03  |                      | GSN Gelsolin                                                                                 |
| 17<br>1.68e+008 | 3<br>1.31e+008  | 22948.9  | 4.60 | HUMAN | <a href="#">IPI00796316</a> | <a href="#">25</a> | 3  | 54.22  |                      | GSN Gelsolin                                                                                 |
| 17<br>1.68e+008 | 3<br>1.31e+008  | 20783.6  | 4.69 | HUMAN | <a href="#">IPI00377087</a> | <a href="#">28</a> | 3  | 54.22  |                      | GSN Gelsolin                                                                                 |
| 11<br>4.11e+008 | 2<br>8.21e+007  | 28953.8  | 7.71 | HUMAN | <a href="#">IPI00641047</a> | <a href="#">10</a> | 2  | 38.25  |                      | GSN Gelsolin                                                                                 |
| 11<br>4.11e+008 | 2<br>8.21e+007  | 25857.3  | 6.61 | HUMAN | <a href="#">IPI00647556</a> | <a href="#">11</a> | 2  | 38.25  |                      | GSN Gelsolin                                                                                 |
| 41<br>3.74e+008 | 15<br>2.82e+008 | 54272.8  | 5.58 | HUMAN | <a href="#">IPI00022895</a> | <a href="#">21</a> | 9  | 125.60 | <a href="#">23.1</a> | A1BG Alpha-1B-glycoprotein precursor                                                         |
| 37<br>3.90e+008 | 14<br>2.67e+008 | 54253.8  | 5.56 | HUMAN | <a href="#">IPI00745089</a> | <a href="#">19</a> | 8  | 111.16 |                      | A1BG alpha 1B-glycoprotein precursor                                                         |
| 29<br>4.79e+008 | 11<br>2.80e+008 | 40718.1  | 5.50 | HUMAN | <a href="#">IPI00644018</a> | <a href="#">17</a> | 5  | 75.99  |                      | A1BG 41 kDa protein                                                                          |
| 28<br>4.89e+008 | 11<br>2.80e+008 | 35271.0  | 5.96 | HUMAN | <a href="#">IPI00646799</a> | <a href="#">15</a> | 4  | 67.58  |                      | A1BG Putative uncharacterized protein DKFZp686F0970                                          |
| 32<br>1.62e+008 | 5<br>3.15e+008  | 106437.0 | 6.40 | HUMAN | <a href="#">IPI00305461</a> | <a href="#">12</a> | 9  | 124.57 | <a href="#">24.1</a> | ITIH2 Inter-alpha-trypsin inhibitor heavy chain H2 precursor                                 |
| 32<br>1.62e+008 | 5<br>3.15e+008  | 105216.6 | 6.56 | HUMAN | <a href="#">IPI00645038</a> | <a href="#">12</a> | 9  | 124.57 |                      | ITIH2 Inter-alpha (Globulin) inhibitor H2                                                    |
| 14<br>5.53e+007 | 3<br>5.16e+008  | 26821.0  | 9.08 | HUMAN | <a href="#">IPI00514159</a> | <a href="#">23</a> | 4  | 60.09  |                      | ITIH2 Inter-alpha (Globulin) inhibitor H2                                                    |
| 6<br>1.69e+008  | 40<br>5.79e+007 | 53154.5  | 5.87 | HUMAN | <a href="#">IPI00032220</a> | <a href="#">18</a> | 7  | 123.11 | <a href="#">25.1</a> | AGT Angiotensinogen precursor                                                                |
| 31<br>1.64e+008 | 23<br>5.05e+007 | 38999.7  | 5.95 | HUMAN | <a href="#">IPI00022426</a> | <a href="#">30</a> | 8  | 118.30 | <a href="#">26.1</a> | AMBP AMBP protein precursor                                                                  |
| 15<br>2.08e+008 | 13<br>1.25e+008 | 36154.3  | 5.65 | HUMAN | <a href="#">IPI00021842</a> | <a href="#">31</a> | 7  | 112.54 | <a href="#">27.1</a> | APOE Apolipoprotein E precursor                                                              |
| 4<br>1.09e+008  | 4<br>1.52e+008  | 32558.2  | 6.99 | HUMAN | <a href="#">IPI00878953</a> | <a href="#">21</a> | 4  | 64.76  |                      | APOE MRNA for apolipoprotein E                                                               |
| 2<br>1.78e+008  | 1<br>8.94e+007  | 24903.6  | 5.75 | HUMAN | <a href="#">IPI00879456</a> | <a href="#">21</a> | 3  | 47.73  |                      | APOE 25 kDa protein                                                                          |
| 2<br>1.78e+008  | 1<br>8.94e+007  | 24647.3  | 5.75 | HUMAN | <a href="#">IPI00879368</a> | <a href="#">21</a> | 3  | 47.73  |                      | APOE Apolipoprotein E                                                                        |

|                 |                 |          |      |       |                             |                    |   |        |                      |                                                              |
|-----------------|-----------------|----------|------|-------|-----------------------------|--------------------|---|--------|----------------------|--------------------------------------------------------------|
| 23<br>6.30e+008 | 10<br>1.89e+008 | 101389.7 | 6.31 | HUMAN | <a href="#">IPI00292530</a> | <a href="#">10</a> | 6 | 110.31 | <a href="#">28.1</a> | ITIH1 Inter-alpha-trypsin inhibitor heavy chain H1 precursor |
| 1<br>1.72e+009  | 0<br>0.00e+000  | 55367.7  | 5.91 | HUMAN | <a href="#">IPI00383338</a> | <a href="#">5</a>  | 1 | 17.05  |                      | ITIH1 PRO2769                                                |
| 0<br>0.00e+000  | 15<br>8.01e+007 | 46736.8  | 5.37 | HUMAN | <a href="#">IPI00553177</a> | <a href="#">20</a> | 8 | 108.17 | <a href="#">29.1</a> | SERPINA1 Isoform 1 of Alpha-1-antitrypsin precursor          |
| 0<br>0.00e+000  | 11<br>6.68e+007 | 40263.0  | 5.26 | HUMAN | <a href="#">IPI00790784</a> | <a href="#">19</a> | 6 | 81.74  |                      | SERPINA1 Isoform 2 of Alpha-1-antitrypsin precursor          |
| 0<br>0.00e+000  | 9<br>5.73e+007  | 13097.5  | 8.93 | HUMAN | <a href="#">IPI00305457</a> | <a href="#">35</a> | 4 | 57.00  |                      | SERPINA1 PRO2275                                             |
| 0<br>0.00e+000  | 6<br>1.14e+008  | 34755.6  | 5.04 | HUMAN | <a href="#">IPI00869004</a> | <a href="#">13</a> | 4 | 51.17  |                      | SERPINA1 Isoform 3 of Alpha-1-antitrypsin precursor          |
| 48<br>1.86e+009 | 42<br>2.33e+008 | 23539.7  | 5.02 | HUMAN | <a href="#">IPI00884926</a> | <a href="#">33</a> | 6 | 104.40 | <a href="#">30.1</a> | ORM1 orosomucoid 1 precursor                                 |
| 48<br>1.86e+009 | 42<br>2.33e+008 | 23511.7  | 4.93 | HUMAN | <a href="#">IPI00022429</a> | <a href="#">33</a> | 6 | 104.40 |                      | ORM1 Alpha-1-acid glycoprotein 1 precursor                   |
| 10<br>1.44e+009 | 22<br>5.87e+008 | 23602.8  | 5.03 | HUMAN | <a href="#">IPI00020091</a> | <a href="#">21</a> | 4 | 61.22  |                      | ORM2 Alpha-1-acid glycoprotein 2 precursor                   |
| 34<br>6.22e+008 | 19<br>8.46e+008 | 54305.9  | 5.55 | HUMAN | <a href="#">IPI00298971</a> | <a href="#">16</a> | 7 | 101.77 | <a href="#">31.1</a> | VTN Vitronectin precursor                                    |
| 0<br>0.00e+000  | 13<br>2.64e+008 | 15998.5  | 6.74 | HUMAN | <a href="#">IPI00654755</a> | <a href="#">59</a> | 7 | 98.54  | <a href="#">32.1</a> | HBB Hemoglobin subunit beta                                  |
| 0<br>0.00e+000  | 10<br>3.12e+008 | 18930.9  | 6.28 | HUMAN | <a href="#">IPI00884107</a> | <a href="#">36</a> | 5 | 66.75  |                      | HBB Beta-globin gene from a thalassemia patient              |
| 0<br>0.00e+000  | 9<br>3.46e+008  | 11504.2  | 5.90 | HUMAN | <a href="#">IPI00796636</a> | <a href="#">45</a> | 4 | 56.27  |                      | HBB Hemoglobin (Fragment)                                    |
| 0<br>0.00e+000  | 9<br>3.76e+008  | 16055.6  | 7.84 | HUMAN | <a href="#">IPI00473011</a> | <a href="#">25</a> | 3 | 41.46  |                      | HBD;HBB Hemoglobin subunit delta                             |
| 0<br>0.00e+000  | 8<br>3.87e+008  | 11459.1  | 6.17 | HUMAN | <a href="#">IPI00829896</a> | <a href="#">37</a> | 3 | 37.50  |                      | HBD Hemoglobin Lepore-Baltimore (Fragment)                   |
| 0<br>0.00e+000  | 7<br>4.40e+008  | 19009.0  | 7.70 | HUMAN | <a href="#">IPI00830113</a> | <a href="#">15</a> | 2 | 26.78  |                      | HBB 19 kDa protein                                           |
| 0<br>0.00e+000  | 7<br>4.40e+008  | 15419.8  | 7.74 | HUMAN | <a href="#">IPI00657660</a> | <a href="#">18</a> | 2 | 26.78  |                      | HBB Hemoglobin delta-beta fusion protein                     |
| 0<br>0.00e+000  | 7<br>4.40e+008  | 11346.0  | 5.89 | HUMAN | <a href="#">IPI00791558</a> | <a href="#">25</a> | 2 | 26.78  |                      | HBB Delta-hemoglobin                                         |
| 0<br>0.00e+000  | 7<br>4.40e+008  | 9117.5   | 6.90 | HUMAN | <a href="#">IPI00884436</a> | <a href="#">29</a> | 2 | 26.78  |                      | - Similar to Beta-hemoglobin                                 |
| 0<br>0.00e+000  | 6<br>2.19e+008  | 17429.1  | 6.04 | HUMAN | <a href="#">IPI00749035</a> | <a href="#">6</a>  | 1 | 12.53  |                      | HBG2 Gamma-G globin                                          |
| 0<br>0.00e+000  | 6<br>2.19e+008  | 17316.0  | 6.04 | HUMAN | <a href="#">IPI00744503</a> | <a href="#">6</a>  | 1 | 12.53  |                      | HBG1 17 kDa protein                                          |
| 0<br>0.00e+000  | 6<br>2.19e+008  | 16594.0  | 6.41 | HUMAN | <a href="#">IPI00816618</a> | <a href="#">6</a>  | 1 | 12.53  |                      | HBG2 Hemoglobin gamma-G (Fragment)                           |
| 0<br>0.00e+000  | 6<br>2.19e+008  | 16202.9  | 8.67 | HUMAN | <a href="#">IPI00217471</a> | <a href="#">6</a>  | 1 | 12.53  |                      | HBE1 Hemoglobin subunit epsilon                              |
| 0<br>0.00e+000  | 6<br>2.19e+008  | 16140.5  | 6.65 | HUMAN | <a href="#">IPI00220706</a> | <a href="#">6</a>  | 1 | 12.53  |                      | HBG1 Hemoglobin subunit gamma-1                              |
| 0<br>0.00e+000  | 6<br>2.19e+008  | 16126.5  | 6.65 | HUMAN | <a href="#">IPI00554676</a> | <a href="#">6</a>  | 1 | 12.53  |                      | HBG2;HBG1 Hemoglobin subunit gamma-2                         |
| 0<br>0.00e+000  | 6<br>2.19e+008  | 15319.1  | 9.48 | HUMAN | <a href="#">IPI00657911</a> | <a href="#">7</a>  | 1 | 12.53  |                      | HBG2 Gamma-globin                                            |
| 0<br>0.00e+000  | 6<br>2.19e+008  | 9470.0   | 9.10 | HUMAN | <a href="#">IPI00853641</a> | <a href="#">11</a> | 1 | 12.53  |                      | HBE1 Uncharacterized protein HBE1                            |
| 0<br>0.00e+000  | 6<br>2.19e+008  | 4508.3   | 9.52 | HUMAN | <a href="#">IPI00815947</a> | <a href="#">22</a> | 1 | 12.53  |                      | HBB Truncated beta-globin (Fragment)                         |

|                 |                 |         |      |       |                             |                    |   |       |                      |                                                                           |
|-----------------|-----------------|---------|------|-------|-----------------------------|--------------------|---|-------|----------------------|---------------------------------------------------------------------------|
| 0<br>0.00e+000  | 1<br>8.40e+006  | 3500.1  | 6.90 | HUMAN | <a href="#">IPI00816644</a> | <a href="#">45</a> | 1 | 10.48 |                      | HBB Hemoglobin beta chain (Fragment)                                      |
| 10<br>2.47e+008 | 17<br>1.36e+008 | 38178.1 | 6.45 | HUMAN | <a href="#">IPI00022417</a> | <a href="#">20</a> | 6 | 93.89 | <a href="#">33.1</a> | LRG1 Leucine-rich alpha-2-glycoprotein precursor                          |
| 21<br>3.36e+008 | 22<br>2.25e+008 | 69069.6 | 5.64 | HUMAN | <a href="#">IPI00019943</a> | <a href="#">15</a> | 7 | 88.54 | <a href="#">34.1</a> | AFM Afamin precursor                                                      |
| 8<br>4.69e+008  | 6<br>6.33e+007  | 63173.8 | 5.43 | HUMAN | <a href="#">IPI00022395</a> | <a href="#">9</a>  | 5 | 88.06 | <a href="#">35.1</a> | C9 Complement component C9 precursor                                      |
| 9<br>7.68e+007  | 8<br>9.31e+007  | 80174.1 | 5.89 | HUMAN | <a href="#">IPI00296165</a> | <a href="#">12</a> | 6 | 87.05 | <a href="#">36.1</a> | C17orf13;ACYP1;C1R Complement C1r subcomponent precursor                  |
| 2<br>2.14e+007  | 1<br>2.74e+007  | 26299.8 | 5.13 | HUMAN | <a href="#">IPI00791901</a> | <a href="#">11</a> | 2 | 23.40 |                      | C1R 26 kDa protein                                                        |
| 15<br>1.23e+008 | 12<br>7.40e+007 | 60178.6 | 6.72 | HUMAN | <a href="#">IPI00292950</a> | <a href="#">14</a> | 7 | 84.55 | <a href="#">37.1</a> | SERPIND1 Serpin peptidase inhibitor, clade D (Heparin cofactor), member 1 |
| 12<br>1.42e+008 | 12<br>7.40e+007 | 57070.9 | 6.41 | HUMAN | <a href="#">IPI00879573</a> | <a href="#">11</a> | 6 | 75.07 |                      | SERPIND1 Heparin cofactor 2 precursor                                     |
| 15<br>2.65e+008 | 20<br>2.32e+008 | 38298.4 | 8.34 | HUMAN | <a href="#">IPI00298828</a> | <a href="#">26</a> | 6 | 82.74 | <a href="#">38.1</a> | APOH Beta-2-glycoprotein 1 precursor                                      |
| 6<br>1.33e+009  | 14<br>2.54e+008 | 20198.9 | 5.16 | HUMAN | <a href="#">IPI00855916</a> | <a href="#">32</a> | 5 | 76.54 | <a href="#">39.1</a> | - Transthyretin                                                           |
| 6<br>1.33e+009  | 14<br>2.54e+008 | 15887.1 | 5.52 | HUMAN | <a href="#">IPI00022432</a> | <a href="#">40</a> | 5 | 76.54 |                      | TTR Transthyretin precursor                                               |
| 6<br>1.33e+009  | 8<br>3.25e+008  | 13154.9 | 5.34 | HUMAN | <a href="#">IPI00646384</a> | <a href="#">30</a> | 3 | 42.60 |                      | TTR 13 kDa protein                                                        |
| 18<br>7.00e+008 | 9<br>2.62e+008  | 57832.9 | 6.25 | HUMAN | <a href="#">IPI00400826</a> | <a href="#">13</a> | 4 | 75.43 | <a href="#">40.1</a> | CLU clusterin isoform 1                                                   |
| 18<br>7.00e+008 | 9<br>2.62e+008  | 52494.9 | 5.89 | HUMAN | <a href="#">IPI00291262</a> | <a href="#">15</a> | 4 | 75.43 |                      | CLU Clusterin precursor                                                   |
| 18<br>7.00e+008 | 9<br>2.62e+008  | 52365.8 | 5.98 | HUMAN | <a href="#">IPI00795633</a> | <a href="#">15</a> | 4 | 75.43 |                      | CLU CLU                                                                   |
| 6<br>9.96e+007  | 3<br>4.81e+007  | 53510.1 | 6.52 | HUMAN | <a href="#">IPI00793848</a> | <a href="#">6</a>  | 2 | 35.72 |                      | CLU 54 kDa protein                                                        |
| 14<br>1.35e+008 | 9<br>3.75e+008  | 39324.9 | 5.43 | HUMAN | <a href="#">IPI00022431</a> | <a href="#">16</a> | 4 | 64.89 | <a href="#">41.1</a> | AHSG Alpha-2-HS-glycoprotein precursor                                    |
| 1<br>6.57e+008  | 5<br>6.36e+008  | 28534.6 | 4.77 | HUMAN | <a href="#">IPI00795830</a> | <a href="#">15</a> | 3 | 44.26 |                      | AHSG 29 kDa protein                                                       |
| 3<br>1.27e+008  | 2<br>6.05e+007  | 71370.2 | 8.60 | HUMAN | <a href="#">IPI00654888</a> | <a href="#">8</a>  | 4 | 61.20 | <a href="#">42.1</a> | KLKB1 Plasma kallikrein precursor                                         |
| 1<br>2.71e+007  | 0<br>0.00e+000  | 16620.4 | 9.04 | HUMAN | <a href="#">IPI00879718</a> | <a href="#">12</a> | 1 | 11.48 |                      | KLKB1 17 kDa protein                                                      |
| 2<br>8.95e+006  | 3<br>2.13e+007  | 21275.7 | 5.06 | HUMAN | <a href="#">IPI00006662</a> | <a href="#">25</a> | 4 | 59.69 | <a href="#">43.1</a> | APOD Apolipoprotein D precursor                                           |
| 0<br>0.00e+000  | 6<br>3.33e+007  | 13532.1 | 6.28 | HUMAN | <a href="#">IPI00552578</a> | <a href="#">39</a> | 3 | 56.51 | <a href="#">44.1</a> | SAA2;SAA1 Serum amyloid A protein precursor                               |
| 0<br>0.00e+000  | 5<br>3.16e+007  | 13527.2 | 9.20 | HUMAN | <a href="#">IPI00006146</a> | <a href="#">22</a> | 2 | 34.69 |                      | SAA2;SAA1 serum amyloid A2                                                |
| 1<br>2.97e+007  | 11<br>4.71e+007 | 53383.9 | 6.23 | HUMAN | <a href="#">IPI00032311</a> | <a href="#">8</a>  | 3 | 55.15 | <a href="#">45.1</a> | LBP Lipopolysaccharide-binding protein precursor                          |
| 0<br>0.00e+000  | 5<br>7.92e+007  | 67033.6 | 7.15 | HUMAN | <a href="#">IPI00021727</a> | <a href="#">6</a>  | 3 | 52.51 | <a href="#">46.1</a> | C4BPA C4b-binding protein alpha chain precursor                           |
| 0<br>0.00e+000  | 3<br>1.12e+008  | 45907.3 | 6.10 | HUMAN | <a href="#">IPI00872510</a> | <a href="#">6</a>  | 2 | 37.40 |                      | C4BPA Uncharacterized protein C4BPA                                       |
| 15<br>4.01e+008 | 5<br>2.65e+008  | 34258.9 | 5.71 | HUMAN | <a href="#">IPI00166729</a> | <a href="#">14</a> | 4 | 50.52 | <a href="#">47.1</a> | AZGP1 alpha-2-glycoprotein 1, zinc                                        |

|                |                 |         |      |       |                             |                    |   |       |                      |                                                                                       |
|----------------|-----------------|---------|------|-------|-----------------------------|--------------------|---|-------|----------------------|---------------------------------------------------------------------------------------|
| 5<br>1.46e+008 | 0<br>0.00e+000  | 23902.9 | 5.78 | HUMAN | <a href="#">IPI00871596</a> | <a href="#">12</a> | 3 | 33.94 |                      | AZGP1 Uncharacterized protein AZGP1 (Fragment)                                        |
| 3<br>1.14e+007 | 0<br>0.00e+000  | 18707.4 | 8.99 | HUMAN | <a href="#">IPI00816309</a> | <a href="#">12</a> | 2 | 22.39 |                      | AZGP1 AZGP1 protein (Fragment)                                                        |
| 7<br>1.49e+008 | 0<br>0.00e+000  | 22277.6 | 8.49 | HUMAN | <a href="#">IPI00011261</a> | <a href="#">23</a> | 3 | 48.92 | <a href="#">48.1</a> | C8G Complement component C8 gamma chain precursor                                     |
| 6<br>1.68e+007 | 0<br>0.00e+000  | 17557.3 | 9.82 | HUMAN | <a href="#">IPI00513935</a> | <a href="#">20</a> | 2 | 28.76 |                      | C8G Complement component 8, gamma polypeptide                                         |
| 0<br>0.00e+000 | 4<br>9.62e+007  | 39473.2 | 8.00 | HUMAN | <a href="#">IPI00218407</a> | <a href="#">13</a> | 4 | 48.66 | <a href="#">49.1</a> | ALDOB Fructose-bisphosphate aldolase B                                                |
| 0<br>0.00e+000 | 2<br>1.47e+008  | 24128.8 | 6.65 | HUMAN | <a href="#">IPI00513830</a> | <a href="#">11</a> | 2 | 27.40 |                      | ALDOB Fructose-bisphosphate aldolase                                                  |
| 3<br>1.41e+008 | 6<br>2.13e+007  | 25773.8 | 8.61 | HUMAN | <a href="#">IPI00022394</a> | <a href="#">17</a> | 3 | 48.37 | <a href="#">50.1</a> | C1QC Complement C1q subcomponent subunit C precursor                                  |
| 0<br>0.00e+000 | 9<br>1.80e+008  | 15280.7 | 8.72 | HUMAN | <a href="#">IPI00853068</a> | <a href="#">25</a> | 3 | 48.23 | <a href="#">51.1</a> | HBA1;HBA2 Alpha 2 globin variant (Fragment)                                           |
| 0<br>0.00e+000 | 9<br>1.80e+008  | 15257.6 | 8.72 | HUMAN | <a href="#">IPI00410714</a> | <a href="#">25</a> | 3 | 48.23 |                      | HBA1;HBA2 Hemoglobin subunit alpha                                                    |
| 6<br>2.08e+008 | 13<br>5.92e+007 | 66035.3 | 6.33 | HUMAN | <a href="#">IPI00020996</a> | <a href="#">7</a>  | 3 | 47.84 | <a href="#">52.1</a> | IGFALS Insulin-like growth factor-binding protein complex acid labile chain precursor |
| 3<br>6.79e+008 | 1<br>3.19e+006  | 22567.0 | 5.52 | HUMAN | <a href="#">IPI00009028</a> | <a href="#">20</a> | 3 | 45.84 | <a href="#">53.1</a> | CLEC3B Tetranectin precursor                                                          |
| 2<br>7.46e+008 | 1<br>3.19e+006  | 17794.2 | 4.96 | HUMAN | <a href="#">IPI00792115</a> | <a href="#">13</a> | 2 | 29.30 |                      | CLEC3B Putative uncharacterized protein DKFZp686H17246                                |
| 1<br>1.07e+007 | 1<br>3.19e+006  | 10656.4 | 8.38 | HUMAN | <a href="#">IPI00791350</a> | <a href="#">9</a>  | 1 | 12.12 |                      | CLEC3B 11 kDa protein                                                                 |
| 6<br>9.85e+007 | 0<br>0.00e+000  | 93518.9 | 6.09 | HUMAN | <a href="#">IPI00296608</a> | <a href="#">6</a>  | 3 | 45.14 | <a href="#">54.1</a> | C7 Complement component C7 precursor                                                  |
| 1<br>9.21e+008 | 3<br>2.39e+006  | 65721.7 | 7.32 | HUMAN | <a href="#">IPI00872555</a> | <a href="#">6</a>  | 3 | 44.37 | <a href="#">55.1</a> | CFI cDNA FLJ76262, highly similar to Homo sapiens I factor (complement) (IF), mRNA    |
| 1<br>9.21e+008 | 3<br>2.39e+006  | 65720.7 | 7.72 | HUMAN | <a href="#">IPI00291867</a> | <a href="#">6</a>  | 3 | 44.37 |                      | CFI Complement factor I precursor                                                     |
| 1<br>9.21e+008 | 2<br>1.53e+006  | 42576.8 | 8.41 | HUMAN | <a href="#">IPI00795153</a> | <a href="#">6</a>  | 2 | 30.47 |                      | CFI 43 kDa protein                                                                    |
| 1<br>9.21e+008 | 2<br>1.53e+006  | 42462.6 | 8.49 | HUMAN | <a href="#">IPI00794070</a> | <a href="#">6</a>  | 2 | 30.47 |                      | CFI CFI protein                                                                       |
| 0<br>0.00e+000 | 1<br>4.10e+006  | 42663.8 | 5.73 | HUMAN | <a href="#">IPI00796990</a> | <a href="#">3</a>  | 1 | 13.90 |                      | CFI Light chain of factor I                                                           |
| 0<br>0.00e+000 | 4<br>5.54e+007  | 57156.4 | 7.95 | HUMAN | <a href="#">IPI00472345</a> | <a href="#">8</a>  | 3 | 43.17 | <a href="#">56.1</a> | IGHG3 IGHG3 protein                                                                   |
| 0<br>0.00e+000 | 4<br>5.54e+007  | 57019.9 | 8.39 | HUMAN | <a href="#">IPI00418153</a> | <a href="#">8</a>  | 3 | 43.17 |                      | IGHM Putative uncharacterized protein DKFZp686I15212                                  |
| 0<br>0.00e+000 | 4<br>5.54e+007  | 56813.6 | 6.43 | HUMAN | <a href="#">IPI00784894</a> | <a href="#">8</a>  | 3 | 43.17 |                      | - Putative uncharacterized protein                                                    |
| 0<br>0.00e+000 | 4<br>5.54e+007  | 56111.3 | 7.80 | HUMAN | <a href="#">IPI00168728</a> | <a href="#">8</a>  | 3 | 43.17 |                      | IGHM FLJ00385 protein (Fragment)                                                      |
| 0<br>0.00e+000 | 4<br>5.54e+007  | 49135.3 | 6.50 | HUMAN | <a href="#">IPI00829850</a> | <a href="#">9</a>  | 3 | 43.17 |                      | IGHG3 Protein                                                                         |
| 0<br>0.00e+000 | 4<br>5.54e+007  | 41329.3 | 8.23 | HUMAN | <a href="#">IPI00827754</a> | <a href="#">11</a> | 3 | 43.17 |                      | IGHG3 C gamma 3                                                                       |
| 0<br>0.00e+000 | 4<br>5.54e+007  | 39720.4 | 8.30 | HUMAN | <a href="#">IPI00829716</a> | <a href="#">12</a> | 3 | 43.17 |                      | IGHG3 Uncharacterized protein IGHG3 (Fragment)                                        |
| 0<br>0.00e+000 | 4<br>5.54e+007  | 38111.5 | 8.38 | HUMAN | <a href="#">IPI00829940</a> | <a href="#">12</a> | 3 | 43.17 |                      | IGHG3 Uncharacterized protein IGHG3 (Fragment)                                        |
| 0<br>0.00e+000 | 3<br>3.62e+007  | 39125.8 | 7.87 | HUMAN | <a href="#">IPI00830033</a> | <a href="#">8</a>  | 2 | 31.49 |                      | IGHM Full-length cDNA clone CS0DI019YF20 of Placenta of Homo sapiens (Fragment)       |



|                |                |         |      |       |                             |                   |   |       |                                                                  |
|----------------|----------------|---------|------|-------|-----------------------------|-------------------|---|-------|------------------------------------------------------------------|
| 0<br>0.00e+000 | 3<br>7.33e+007 | 60102.5 | 7.48 | HUMAN | <a href="#">IPI00448925</a> | <a href="#">4</a> | 2 | 26.84 | IGHG1 IGHG1 protein                                              |
| 0<br>0.00e+000 | 3<br>7.33e+007 | 52852.3 | 8.74 | HUMAN | <a href="#">IPI00384938</a> | <a href="#">4</a> | 2 | 26.84 | IGHG1 Putative uncharacterized protein DKFZp686N02209            |
| 0<br>0.00e+000 | 3<br>7.33e+007 | 52759.2 | 8.75 | HUMAN | <a href="#">IPI00423466</a> | <a href="#">4</a> | 2 | 26.84 | IGHG1 Putative uncharacterized protein DKFZp686H20196            |
| 0<br>0.00e+000 | 3<br>7.33e+007 | 52666.9 | 7.50 | HUMAN | <a href="#">IPI00472610</a> | <a href="#">5</a> | 2 | 26.84 | IGHM IGHM protein                                                |
| 0<br>0.00e+000 | 3<br>7.33e+007 | 52612.9 | 8.46 | HUMAN | <a href="#">IPI00423463</a> | <a href="#">5</a> | 2 | 26.84 | IGHG1 Putative uncharacterized protein DKFZp686O01196            |
| 0<br>0.00e+000 | 3<br>7.33e+007 | 52586.7 | 7.53 | HUMAN | <a href="#">IPI00761159</a> | <a href="#">5</a> | 2 | 26.84 | IGHM IGHM protein                                                |
| 0<br>0.00e+000 | 3<br>7.33e+007 | 52362.7 | 8.64 | HUMAN | <a href="#">IPI00784817</a> | <a href="#">5</a> | 2 | 26.84 | IGHV4-31 Anti-RhD monoclonal T125 gamma1 heavy chain precursor   |
| 0<br>0.00e+000 | 3<br>7.33e+007 | 52360.7 | 8.84 | HUMAN | <a href="#">IPI00423464</a> | <a href="#">5</a> | 2 | 26.84 | IGHG1 Putative uncharacterized protein DKFZp686K03196            |
| 0<br>0.00e+000 | 3<br>7.33e+007 | 52286.6 | 8.84 | HUMAN | <a href="#">IPI00785084</a> | <a href="#">5</a> | 2 | 26.84 | IGHV4-31 Immunoglobulin heavy variable 4-31                      |
| 0<br>0.00e+000 | 3<br>7.33e+007 | 52121.3 | 7.50 | HUMAN | <a href="#">IPI00784828</a> | <a href="#">5</a> | 2 | 26.84 | - Putative uncharacterized protein DKFZp686C11235                |
| 0<br>0.00e+000 | 3<br>7.33e+007 | 52043.2 | 8.31 | HUMAN | <a href="#">IPI00784842</a> | <a href="#">5</a> | 2 | 26.84 | IGHV4-31 Putative uncharacterized protein DKFZp686G11190         |
| 0<br>0.00e+000 | 3<br>7.33e+007 | 51987.3 | 8.57 | HUMAN | <a href="#">IPI00807531</a> | <a href="#">5</a> | 2 | 26.84 | IGHG1 IGHG1 protein                                              |
| 0<br>0.00e+000 | 3<br>7.33e+007 | 51724.9 | 8.14 | HUMAN | <a href="#">IPI00645363</a> | <a href="#">5</a> | 2 | 26.84 | IGHG1 Putative uncharacterized protein DKFZp686P15220            |
| 0<br>0.00e+000 | 3<br>7.33e+007 | 51715.8 | 7.88 | HUMAN | <a href="#">IPI00815926</a> | <a href="#">5</a> | 2 | 26.84 | IGHG1 IGHG1 protein                                              |
| 0<br>0.00e+000 | 3<br>7.33e+007 | 51596.7 | 8.44 | HUMAN | <a href="#">IPI00876888</a> | <a href="#">5</a> | 2 | 26.84 | - cDNA FLJ78387                                                  |
| 0<br>0.00e+000 | 3<br>7.33e+007 | 51395.4 | 8.69 | HUMAN | <a href="#">IPI00448938</a> | <a href="#">5</a> | 2 | 26.84 | IGHG1 IGHG1 protein                                              |
| 0<br>0.00e+000 | 3<br>7.33e+007 | 51344.3 | 7.54 | HUMAN | <a href="#">IPI00784822</a> | <a href="#">5</a> | 2 | 26.84 | IGHV4-31 IGHV4-31 protein                                        |
| 0<br>0.00e+000 | 3<br>7.33e+007 | 51254.2 | 7.88 | HUMAN | <a href="#">IPI00829944</a> | <a href="#">5</a> | 2 | 26.84 | IGHG1 IGHG1 protein                                              |
| 0<br>0.00e+000 | 3<br>7.33e+007 | 51204.5 | 8.46 | HUMAN | <a href="#">IPI00784810</a> | <a href="#">5</a> | 2 | 26.84 | IGHV4-31 IGHV4-31 protein                                        |
| 0<br>0.00e+000 | 3<br>7.33e+007 | 50927.0 | 8.33 | HUMAN | <a href="#">IPI00816314</a> | <a href="#">5</a> | 2 | 26.84 | IGHM Putative uncharacterized protein DKFZp686I15196             |
| 0<br>0.00e+000 | 3<br>7.33e+007 | 38162.4 | 8.27 | HUMAN | <a href="#">IPI00816681</a> | <a href="#">6</a> | 2 | 26.84 | IGHM Hepatitis B virus receptor binding protein (Fragment)       |
| 0<br>0.00e+000 | 2<br>5.35e+007 | 75553.5 | 6.60 | HUMAN | <a href="#">IPI00382606</a> | <a href="#">1</a> | 1 | 15.16 | F7 Factor VII active site mutant immunoconjugate                 |
| 0<br>0.00e+000 | 2<br>5.35e+007 | 52420.7 | 7.89 | HUMAN | <a href="#">IPI00784998</a> | <a href="#">2</a> | 1 | 15.16 | - Putative uncharacterized protein DKFZp686M24218                |
| 0<br>0.00e+000 | 2<br>5.35e+007 | 51986.4 | 8.14 | HUMAN | <a href="#">IPI00550640</a> | <a href="#">2</a> | 1 | 15.16 | IGHG4 IGHG4 protein                                              |
| 0<br>0.00e+000 | 2<br>5.35e+007 | 51536.5 | 7.51 | HUMAN | <a href="#">IPI00784942</a> | <a href="#">2</a> | 1 | 15.16 | - Putative uncharacterized protein DKFZp686E23209                |
| 0<br>0.00e+000 | 2<br>5.35e+007 | 51325.5 | 6.56 | HUMAN | <a href="#">IPI00784807</a> | <a href="#">2</a> | 1 | 15.16 | IGHG2 Putative uncharacterized protein                           |
| 0<br>0.00e+000 | 2<br>5.35e+007 | 51099.2 | 7.85 | HUMAN | <a href="#">IPI00426051</a> | <a href="#">2</a> | 1 | 15.16 | LOC100133739 Putative uncharacterized protein DKFZp686C15213     |
| 0<br>0.00e+000 | 2<br>5.35e+007 | 46061.2 | 7.63 | HUMAN | <a href="#">IPI00399007</a> | <a href="#">2</a> | 1 | 15.16 | IGHG2 Putative uncharacterized protein DKFZp686I04196 (Fragment) |
| 0<br>0.00e+000 | 2<br>5.35e+007 | 43922.3 | 8.98 | HUMAN | <a href="#">IPI00829767</a> | <a href="#">2</a> | 1 | 15.16 | IGHG2 Uncharacterized protein IGHG2 (Fragment)                   |



|                 |                 |          |      |       |                             |                    |   |       |                      |                                                                |
|-----------------|-----------------|----------|------|-------|-----------------------------|--------------------|---|-------|----------------------|----------------------------------------------------------------|
| 0<br>0.00e+000  | 2<br>5.35e+007  | 43372.3  | 8.30 | HUMAN | <a href="#">IPI00830132</a> | <a href="#">2</a>  | 1 | 15.16 |                      | IGHG4 Uncharacterized protein IGHG4 (Fragment)                 |
| 0<br>0.00e+000  | 2<br>5.35e+007  | 35940.7  | 7.18 | HUMAN | <a href="#">IPI00829814</a> | <a href="#">3</a>  | 1 | 15.16 |                      | IGHG4 Ig gamma-4 chain C region                                |
| 0<br>0.00e+000  | 1<br>1.13e+008  | 24904.2  | 7.79 | HUMAN | <a href="#">IPI00844239</a> | <a href="#">5</a>  | 1 | 11.68 |                      | - Immunoblobulin G1 Fab heavy chain variable region (Fragment) |
| 0<br>0.00e+000  | 1<br>1.13e+008  | 22226.0  | 8.44 | HUMAN | <a href="#">IPI00442911</a> | <a href="#">6</a>  | 1 | 11.68 |                      | IGHV4-31 CDNA FLJ26266 fis, clone DMC05613                     |
| 0<br>0.00e+000  | 9<br>1.97e+008  | 25038.7  | 5.45 | HUMAN | <a href="#">IPI00022389</a> | <a href="#">14</a> | 3 | 41.98 | <a href="#">57.1</a> | CRP Isoform 1 of C-reactive protein precursor                  |
| 0<br>0.00e+000  | 5<br>1.70e+008  | 11631.6  | 8.60 | HUMAN | <a href="#">IPI00642842</a> | <a href="#">9</a>  | 1 | 9.77  |                      | CRP C-reactive protein, pentraxin-related                      |
| 0<br>0.00e+000  | 5<br>1.70e+008  | 10415.2  | 9.26 | HUMAN | <a href="#">IPI00218876</a> | <a href="#">10</a> | 1 | 9.77  |                      | CRP Isoform 2 of C-reactive protein precursor                  |
| 8<br>2.19e+008  | 2<br>2.88e+008  | 55064.7  | 5.97 | HUMAN | <a href="#">IPI00029863</a> | <a href="#">8</a>  | 3 | 41.93 | <a href="#">58.1</a> | SERPINF2 SERPINF2 protein                                      |
| 8<br>2.19e+008  | 2<br>2.88e+008  | 54566.1  | 5.87 | HUMAN | <a href="#">IPI00879231</a> | <a href="#">8</a>  | 3 | 41.93 |                      | SERPINF2 Alpha-2-antiplasmin precursor                         |
| 8<br>2.19e+008  | 2<br>2.88e+008  | 27823.2  | 6.30 | HUMAN | <a href="#">IPI00879937</a> | <a href="#">16</a> | 3 | 41.93 |                      | SERPINF2 28 kDa protein                                        |
| 7<br>2.31e+008  | 1<br>5.70e+008  | 18555.5  | 5.57 | HUMAN | <a href="#">IPI00879608</a> | <a href="#">18</a> | 2 | 27.64 |                      | SERPINF2 19 kDa protein                                        |
| 3<br>8.67e+007  | 2<br>2.88e+008  | 29543.4  | 6.44 | HUMAN | <a href="#">IPI00877925</a> | <a href="#">10</a> | 2 | 26.67 |                      | SERPINF2 30 kDa protein                                        |
| 9<br>1.37e+008  | 12<br>4.91e+007 | 25387.2  | 6.10 | HUMAN | <a href="#">IPI00022391</a> | <a href="#">16</a> | 3 | 41.23 | <a href="#">59.1</a> | APCS Serum amyloid P-component precursor                       |
| 17<br>4.64e+007 | 9<br>2.23e+008  | 11175.1  | 6.27 | HUMAN | <a href="#">IPI00021854</a> | <a href="#">31</a> | 3 | 39.98 | <a href="#">60.1</a> | APOA2 Apolipoprotein A-II precursor                            |
| 0<br>0.00e+000  | 7<br>1.05e+008  | 94973.5  | 5.70 | HUMAN | <a href="#">IPI00021885</a> | <a href="#">4</a>  | 3 | 39.29 | <a href="#">61.1</a> | FGA Isoform 1 of Fibrinogen alpha chain precursor              |
| 0<br>0.00e+000  | 7<br>1.05e+008  | 69757.0  | 8.23 | HUMAN | <a href="#">IPI00029717</a> | <a href="#">6</a>  | 3 | 39.29 |                      | FGA Isoform 2 of Fibrinogen alpha chain precursor              |
| 1<br>6.41e+006  | 4<br>3.69e+007  | 60615.1  | 5.63 | HUMAN | <a href="#">IPI00479116</a> | <a href="#">5</a>  | 2 | 38.20 | <a href="#">62.1</a> | CPN2 Carboxypeptidase N subunit 2 precursor                    |
| 1<br>6.41e+006  | 4<br>3.69e+007  | 60585.0  | 5.72 | HUMAN | <a href="#">IPI00738433</a> | <a href="#">5</a>  | 2 | 38.20 |                      | CPN2 similar to Carboxypeptidase N subunit 2 precursor         |
| 5<br>5.95e+006  | 0<br>0.00e+000  | 252209.2 | 5.66 | HUMAN | <a href="#">IPI00022937</a> | <a href="#">2</a>  | 4 | 38.19 | <a href="#">63.1</a> | F5 Coagulation factor V                                        |
| 5<br>5.95e+006  | 0<br>0.00e+000  | 251672.6 | 5.68 | HUMAN | <a href="#">IPI00478809</a> | <a href="#">2</a>  | 4 | 38.19 |                      | F5 Coagulation factor V precursor                              |
| 0<br>0.00e+000  | 4<br>8.78e+007  | 68611.0  | 6.86 | HUMAN | <a href="#">IPI00479708</a> | <a href="#">3</a>  | 2 | 38.03 | <a href="#">64.1</a> | IGHM IGHM protein                                              |
| 0<br>0.00e+000  | 4<br>8.78e+007  | 68125.5  | 6.44 | HUMAN | <a href="#">IPI00884180</a> | <a href="#">3</a>  | 2 | 38.03 |                      | IGHM IGHM protein                                              |
| 0<br>0.00e+000  | 4<br>8.78e+007  | 67296.3  | 5.89 | HUMAN | <a href="#">IPI00477090</a> | <a href="#">3</a>  | 2 | 38.03 |                      | IGHM IGHM protein                                              |
| 0<br>0.00e+000  | 4<br>8.78e+007  | 66184.9  | 6.53 | HUMAN | <a href="#">IPI00549291</a> | <a href="#">3</a>  | 2 | 38.03 |                      | IGHM IGHM protein                                              |
| 0<br>0.00e+000  | 4<br>8.78e+007  | 65305.2  | 8.10 | HUMAN | <a href="#">IPI00884141</a> | <a href="#">3</a>  | 2 | 38.03 |                      | IGHM IGHM protein                                              |
| 0<br>0.00e+000  | 4<br>8.78e+007  | 65301.2  | 8.10 | HUMAN | <a href="#">IPI00884293</a> | <a href="#">3</a>  | 2 | 38.03 |                      | IGHM IGHM protein                                              |
| 0<br>0.00e+000  | 4<br>8.78e+007  | 65291.2  | 8.45 | HUMAN | <a href="#">IPI00884452</a> | <a href="#">3</a>  | 2 | 38.03 |                      | IGHM IGHM protein                                              |
| 0<br>0.00e+000  | 4<br>8.78e+007  | 65275.1  | 8.10 | HUMAN | <a href="#">IPI00883614</a> | <a href="#">3</a>  | 2 | 38.03 |                      | IGHM IGHM protein                                              |

|                 |                |          |       |       |                             |                    |   |       |                      |                                                             |
|-----------------|----------------|----------|-------|-------|-----------------------------|--------------------|---|-------|----------------------|-------------------------------------------------------------|
| 0<br>0.00e+000  | 4<br>8.78e+007 | 65039.5  | 6.34  | HUMAN | <a href="#">IPI00828205</a> | <a href="#">3</a>  | 2 | 38.03 |                      | IGHM IGHM protein                                           |
| 0<br>0.00e+000  | 3<br>8.89e+007 | 43057.5  | 5.12  | HUMAN | <a href="#">IPI00385264</a> | <a href="#">2</a>  | 1 | 19.62 |                      | - Ig mu heavy chain disease protein                         |
| 1<br>9.04e+006  | 5<br>9.30e+007 | 55928.5  | 8.54  | HUMAN | <a href="#">IPI00298497</a> | <a href="#">5</a>  | 2 | 36.56 | <a href="#">65.1</a> | FGB Fibrinogen beta chain precursor                         |
| 3<br>1.02e+007  | 4<br>5.09e+007 | 12815.6  | 7.90  | HUMAN | <a href="#">IPI00657670</a> | <a href="#">23</a> | 2 | 35.90 | <a href="#">66.1</a> | - Apolipoprotein C-III variant 1                            |
| 3<br>1.02e+007  | 4<br>5.09e+007 | 10852.4  | 5.23  | HUMAN | <a href="#">IPI00021857</a> | <a href="#">27</a> | 2 | 35.90 |                      | APOC3 Apolipoprotein C-III precursor                        |
| 1<br>7.20e+006  | 7<br>1.14e+007 | 431766.7 | 9.22  | HUMAN | <a href="#">IPI00009286</a> | <a href="#">1</a>  | 4 | 35.74 | <a href="#">67.1</a> | MLL Isoform 1 of Zinc finger protein HRX                    |
| 1<br>7.20e+006  | 7<br>1.14e+007 | 427735.0 | 9.27  | HUMAN | <a href="#">IPI00218500</a> | <a href="#">1</a>  | 4 | 35.74 |                      | MLL Isoform 14P-18B of Zinc finger protein HRX              |
| 1<br>7.20e+006  | 1<br>3.33e+006 | 54317.3  | 11.14 | HUMAN | <a href="#">IPI00155551</a> | <a href="#">1</a>  | 1 | 12.13 |                      | MLL MLL (Fragment)                                          |
| 2<br>2.20e+007  | 0<br>0.00e+000 | 28357.7  | 5.05  | HUMAN | <a href="#">IPI00025862</a> | <a href="#">10</a> | 2 | 34.47 | <a href="#">68.1</a> | C4BPB Isoform 1 of C4b-binding protein beta chain precursor |
| 2<br>2.20e+007  | 0<br>0.00e+000 | 28286.6  | 5.05  | HUMAN | <a href="#">IPI00555752</a> | <a href="#">10</a> | 2 | 34.47 |                      | C4BPB Isoform 2 of C4b-binding protein beta chain precursor |
| 1<br>1.29e+007  | 0<br>0.00e+000 | 20298.1  | 5.03  | HUMAN | <a href="#">IPI00643437</a> | <a href="#">6</a>  | 1 | 15.14 |                      | C4BPB Complement component 4 binding protein, beta          |
| 11<br>2.97e+007 | 0<br>0.00e+000 | 46324.8  | 5.87  | HUMAN | <a href="#">IPI00292946</a> | <a href="#">4</a>  | 2 | 33.22 | <a href="#">69.1</a> | SERPINA7 Thyroxine-binding globulin precursor               |
| 7<br>3.12e+007  | 2<br>1.09e+008 | 32117.4  | 6.60  | HUMAN | <a href="#">IPI00807459</a> | <a href="#">11</a> | 2 | 32.83 | <a href="#">70.1</a> | IGKC IGKC protein                                           |
| 7<br>3.12e+007  | 2<br>1.09e+008 | 26245.8  | 8.57  | HUMAN | <a href="#">IPI00440577</a> | <a href="#">13</a> | 2 | 32.83 |                      | IGKV2-24 IGKV2-24 protein                                   |
| 7<br>3.12e+007  | 2<br>1.09e+008 | 26234.7  | 8.24  | HUMAN | <a href="#">IPI00550731</a> | <a href="#">13</a> | 2 | 32.83 |                      | - Putative uncharacterized protein                          |
| 7<br>3.12e+007  | 2<br>1.09e+008 | 26234.6  | 6.30  | HUMAN | <a href="#">IPI00419424</a> | <a href="#">13</a> | 2 | 32.83 |                      | IGKV1-5 IGKV1-5 protein                                     |
| 7<br>3.12e+007  | 2<br>1.09e+008 | 26024.4  | 5.93  | HUMAN | <a href="#">IPI00854806</a> | <a href="#">13</a> | 2 | 32.83 |                      | IGKV1-5 IGKV1-5 protein                                     |
| 7<br>3.12e+007  | 2<br>1.09e+008 | 25936.4  | 8.69  | HUMAN | <a href="#">IPI00472961</a> | <a href="#">13</a> | 2 | 32.83 |                      | IGKC IGKC protein                                           |
| 7<br>3.12e+007  | 2<br>1.09e+008 | 25924.3  | 8.43  | HUMAN | <a href="#">IPI00816118</a> | <a href="#">13</a> | 2 | 32.83 |                      | IGKC IGKC protein                                           |
| 7<br>3.12e+007  | 2<br>1.09e+008 | 25871.2  | 6.72  | HUMAN | <a href="#">IPI00478600</a> | <a href="#">13</a> | 2 | 32.83 |                      | IGKV1-5 IGKV1-5 protein                                     |
| 7<br>3.12e+007  | 2<br>1.09e+008 | 25834.0  | 6.14  | HUMAN | <a href="#">IPI00889156</a> | <a href="#">13</a> | 2 | 32.83 |                      | IGKV3-20 IGK@ protein                                       |
| 7<br>3.12e+007  | 2<br>1.09e+008 | 25807.2  | 8.17  | HUMAN | <a href="#">IPI00784661</a> | <a href="#">13</a> | 2 | 32.83 |                      | - Putative uncharacterized protein                          |
| 7<br>3.12e+007  | 2<br>1.09e+008 | 25773.0  | 5.94  | HUMAN | <a href="#">IPI00784865</a> | <a href="#">13</a> | 2 | 32.83 |                      | IGK@ IGK@ protein                                           |
| 7<br>3.12e+007  | 2<br>1.09e+008 | 25765.0  | 5.75  | HUMAN | <a href="#">IPI00430820</a> | <a href="#">14</a> | 2 | 32.83 |                      | IGKV1-5 IGKV1-5 protein                                     |
| 7<br>3.12e+007  | 2<br>1.09e+008 | 25751.1  | 7.54  | HUMAN | <a href="#">IPI00827488</a> | <a href="#">13</a> | 2 | 32.83 |                      | IGKC IGKC protein                                           |
| 7<br>3.12e+007  | 2<br>1.09e+008 | 25741.2  | 8.49  | HUMAN | <a href="#">IPI00784070</a> | <a href="#">13</a> | 2 | 32.83 |                      | IGKC IGKC protein                                           |
| 7<br>3.12e+007  | 2<br>1.09e+008 | 25707.1  | 8.17  | HUMAN | <a href="#">IPI00430847</a> | <a href="#">13</a> | 2 | 32.83 |                      | IGKC IGKC protein                                           |
| 7<br>3.12e+007  | 2<br>1.09e+008 | 25702.1  | 7.51  | HUMAN | <a href="#">IPI00784773</a> | <a href="#">13</a> | 2 | 32.83 |                      | - Putative uncharacterized protein                          |

|                 |                |          |      |       |                             |                    |   |       |                      |                                                                                   |
|-----------------|----------------|----------|------|-------|-----------------------------|--------------------|---|-------|----------------------|-----------------------------------------------------------------------------------|
| 7<br>3.12e+007  | 2<br>1.09e+008 | 25697.9  | 8.69 | HUMAN | <a href="#">IPI00853045</a> | <a href="#">14</a> | 2 | 32.83 |                      | IGKC Anti-RhD monoclonal T125 kappa light chain precursor                         |
| 7<br>3.12e+007  | 2<br>1.09e+008 | 25674.1  | 8.62 | HUMAN | <a href="#">IPI00761125</a> | <a href="#">14</a> | 2 | 32.83 |                      | IGKC IGKC protein                                                                 |
| 7<br>3.12e+007  | 2<br>1.09e+008 | 25602.9  | 7.55 | HUMAN | <a href="#">IPI00746963</a> | <a href="#">13</a> | 2 | 32.83 |                      | IGKC IGKC protein                                                                 |
| 7<br>3.12e+007  | 2<br>1.09e+008 | 25520.8  | 6.14 | HUMAN | <a href="#">IPI00784985</a> | <a href="#">14</a> | 2 | 32.83 |                      | IGK@ IGK@ protein                                                                 |
| 7<br>3.12e+007  | 2<br>1.09e+008 | 25389.7  | 6.30 | HUMAN | <a href="#">IPI00845354</a> | <a href="#">14</a> | 2 | 32.83 |                      | IGKC IGKC protein                                                                 |
| 7<br>3.12e+007  | 2<br>1.09e+008 | 24030.1  | 8.29 | HUMAN | <a href="#">IPI00430808</a> | <a href="#">15</a> | 2 | 32.83 |                      | IGKC Immunoblobulin light chain (Fragment)                                        |
| 6<br>2.82e+007  | 0<br>0.00e+000 | 20668.5  | 5.13 | HUMAN | <a href="#">IPI00556287</a> | <a href="#">8</a>  | 1 | 13.31 |                      | - Putative uncharacterized protein                                                |
| 3<br>9.43e+007  | 0<br>0.00e+000 | 83268.3  | 7.23 | HUMAN | <a href="#">IPI00303963</a> | <a href="#">4</a>  | 3 | 32.45 | <a href="#">71.1</a> | C2 Complement C2 precursor (Fragment)                                             |
| 3<br>9.43e+007  | 0<br>0.00e+000 | 58789.4  | 7.88 | HUMAN | <a href="#">IPI00643506</a> | <a href="#">7</a>  | 3 | 32.45 |                      | C2 Complement component 2                                                         |
| 1<br>2.03e+008  | 0<br>0.00e+000 | 39350.0  | 5.89 | HUMAN | <a href="#">IPI00645500</a> | <a href="#">2</a>  | 1 | 12.18 |                      | C2 Complement component 2                                                         |
| 1<br>1.29e+008  | 2<br>1.02e+008 | 38429.2  | 6.16 | HUMAN | <a href="#">IPI00020986</a> | <a href="#">5</a>  | 2 | 32.21 | <a href="#">72.1</a> | LUM Lumican precursor                                                             |
| 1<br>1.29e+008  | 2<br>1.02e+008 | 23151.8  | 8.52 | HUMAN | <a href="#">IPI00794403</a> | <a href="#">9</a>  | 2 | 32.21 |                      | LUM 23 kDa protein                                                                |
| 1<br>1.29e+008  | 1<br>9.96e+007 | 26325.4  | 6.65 | HUMAN | <a href="#">IPI00796888</a> | <a href="#">4</a>  | 1 | 16.24 |                      | LUM 26 kDa protein                                                                |
| 0<br>0.00e+000  | 3<br>1.15e+008 | 46342.5  | 5.97 | HUMAN | <a href="#">IPI00006114</a> | <a href="#">5</a>  | 2 | 31.95 | <a href="#">73.1</a> | SERPINF1 Pigment epithelium-derived factor precursor                              |
| 0<br>0.00e+000  | 2<br>3.07e+007 | 24515.3  | 5.84 | HUMAN | <a href="#">IPI00796279</a> | <a href="#">4</a>  | 1 | 17.86 |                      | SERPINF1 25 kDa protein                                                           |
| 0<br>0.00e+000  | 1<br>2.83e+008 | 12025.8  | 4.72 | HUMAN | <a href="#">IPI00790473</a> | <a href="#">12</a> | 1 | 14.09 |                      | SERPINF1 12 kDa protein                                                           |
| 10<br>1.09e+008 | 0<br>0.00e+000 | 68000.7  | 7.62 | HUMAN | <a href="#">IPI00394992</a> | <a href="#">4</a>  | 2 | 31.35 | <a href="#">74.1</a> | PGLYRP2 Isoform 2 of N-acetylmuramoyl-L-alanine amidase precursor                 |
| 10<br>1.09e+008 | 0<br>0.00e+000 | 62217.3  | 7.25 | HUMAN | <a href="#">IPI00163207</a> | <a href="#">4</a>  | 2 | 31.35 |                      | PGLYRP2 Isoform 1 of N-acetylmuramoyl-L-alanine amidase precursor                 |
| 3<br>2.68e+007  | 0<br>0.00e+000 | 158538.0 | 7.24 | HUMAN | <a href="#">IPI00027235</a> | <a href="#">2</a>  | 3 | 30.07 | <a href="#">75.1</a> | ATRN Isoform 1 of Attractin precursor                                             |
| 3<br>2.68e+007  | 0<br>0.00e+000 | 150810.8 | 7.14 | HUMAN | <a href="#">IPI00218460</a> | <a href="#">2</a>  | 3 | 30.07 |                      | ATRN Isoform 3 of Attractin precursor                                             |
| 3<br>2.68e+007  | 0<br>0.00e+000 | 141429.8 | 6.65 | HUMAN | <a href="#">IPI00162735</a> | <a href="#">2</a>  | 3 | 30.07 |                      | ATRN Isoform 2 of Attractin precursor                                             |
| 4<br>6.36e+007  | 0<br>0.00e+000 | 46723.3  | 6.28 | HUMAN | <a href="#">IPI00641737</a> | <a href="#">6</a>  | 2 | 29.00 | <a href="#">76.1</a> | HP Haptoglobin precursor                                                          |
| 4<br>6.36e+007  | 0<br>0.00e+000 | 43055.8  | 6.45 | HUMAN | <a href="#">IPI00607707</a> | <a href="#">6</a>  | 2 | 29.00 |                      | HPR Isoform 2 of Haptoglobin-related protein precursor                            |
| 4<br>6.36e+007  | 0<br>0.00e+000 | 39007.7  | 6.41 | HUMAN | <a href="#">IPI00477597</a> | <a href="#">7</a>  | 2 | 29.00 |                      | HPR Isoform 1 of Haptoglobin-related protein precursor                            |
| 4<br>6.36e+007  | 0<br>0.00e+000 | 38452.0  | 6.13 | HUMAN | <a href="#">IPI00478493</a> | <a href="#">7</a>  | 2 | 29.00 |                      | HP HP protein                                                                     |
| 1<br>1.72e+006  | 0<br>0.00e+000 | 31382.1  | 8.48 | HUMAN | <a href="#">IPI00431645</a> | <a href="#">3</a>  | 1 | 9.90  |                      | HP HP protein                                                                     |
| 2<br>6.14e+006  | 2<br>8.17e+007 | 92336.9  | 5.91 | HUMAN | <a href="#">IPI00299503</a> | <a href="#">3</a>  | 2 | 28.91 | <a href="#">77.1</a> | GPLD1 Isoform 1 of Phosphatidylinositol-glycan-specific phospholipase D precursor |
| 0<br>0.00e+000  | 3<br>8.72e+007 | 14806.8  | 9.27 | HUMAN | <a href="#">IPI00019399</a> | <a href="#">14</a> | 2 | 26.15 | <a href="#">78.1</a> | SAA4 Serum amyloid A-4 protein precursor                                          |

|                              |                              |         |      |       |                             |                    |   |       |                      |                                                                   |
|------------------------------|------------------------------|---------|------|-------|-----------------------------|--------------------|---|-------|----------------------|-------------------------------------------------------------------|
| <b>2</b><br><b>1.28e+008</b> | 0<br>0.00e+000               | 25505.6 | 8.20 | HUMAN | <a href="#">IPI00026199</a> | <a href="#">12</a> | 2 | 24.96 | <a href="#">79.1</a> | GPX3 Glutathione peroxidase 3 precursor                           |
| <b>2</b><br><b>4.89e+008</b> | 0<br>0.00e+000               | 65163.6 | 6.07 | HUMAN | <a href="#">IPI00011252</a> | <a href="#">4</a>  | 2 | 24.93 | <a href="#">80.1</a> | C8A Complement component C8 alpha chain precursor                 |
| <b>1</b><br><b>4.44e+006</b> | <b>2</b><br><b>5.49e+008</b> | 45141.1 | 5.64 | HUMAN | <a href="#">IPI00027482</a> | <a href="#">6</a>  | 2 | 24.61 | <a href="#">81.1</a> | SERPINA6 Corticosteroid-binding globulin precursor                |
| 0<br>0.00e+000               | <b>2</b><br><b>3.76e+007</b> | 27745.3 | 4.73 | HUMAN | <a href="#">IPI00021263</a> | <a href="#">8</a>  | 2 | 24.12 | <a href="#">82.1</a> | YWHAZ 14-3-3 protein zeta/delta                                   |
| 0<br>0.00e+000               | <b>2</b><br><b>3.76e+007</b> | 27742.2 | 4.65 | HUMAN | <a href="#">IPI00879359</a> | <a href="#">8</a>  | 2 | 24.12 |                      | - 28 kDa protein                                                  |
| 0<br>0.00e+000               | <b>1</b><br><b>5.49e+007</b> | 19072.5 | 4.48 | HUMAN | <a href="#">IPI00789337</a> | <a href="#">7</a>  | 1 | 13.16 |                      | YWHAZ cDNA, FLJ79516, highly similar to 14-3-3 protein zeta/delta |
| 0<br>0.00e+000               | <b>2</b><br><b>7.40e+007</b> | 10931.7 | 8.89 | HUMAN | <a href="#">IPI00220362</a> | <a href="#">13</a> | 1 | 23.59 | <a href="#">83.1</a> | HSPE1 10 kDa heat shock protein, mitochondrial                    |
| 0<br>0.00e+000               | <b>4</b><br><b>1.67e+007</b> | 57937.2 | 7.95 | HUMAN | <a href="#">IPI00479186</a> | <a href="#">4</a>  | 2 | 23.09 | <a href="#">84.1</a> | PKM2 Isoform M2 of Pyruvate kinase isozymes M1/M2                 |
| 0<br>0.00e+000               | <b>3</b><br><b>2.15e+007</b> | 58062.4 | 7.61 | HUMAN | <a href="#">IPI00220644</a> | <a href="#">2</a>  | 1 | 15.32 |                      | PKM2 Isoform M1 of Pyruvate kinase isozymes M1/M2                 |
| 0<br>0.00e+000               | <b>3</b><br><b>2.15e+007</b> | 39592.8 | 6.51 | HUMAN | <a href="#">IPI00888126</a> | <a href="#">3</a>  | 1 | 15.32 |                      | LOC652797 similar to pyruvate kinase, muscle                      |
| 0<br>0.00e+000               | <b>3</b><br><b>2.15e+007</b> | 26586.6 | 5.42 | HUMAN | <a href="#">IPI00607698</a> | <a href="#">5</a>  | 1 | 15.32 |                      | PKM2 27 kDa protein                                               |
| 0<br>0.00e+000               | <b>3</b><br><b>2.15e+007</b> | 26383.3 | 5.42 | HUMAN | <a href="#">IPI00788663</a> | <a href="#">5</a>  | 1 | 15.32 |                      | PKM2 26 kDa protein                                               |
| 0<br>0.00e+000               | <b>3</b><br><b>2.15e+007</b> | 24333.7 | 6.50 | HUMAN | <a href="#">IPI00792817</a> | <a href="#">5</a>  | 1 | 15.32 |                      | PKM2 24 kDa protein                                               |
| 0<br>0.00e+000               | <b>3</b><br><b>2.15e+007</b> | 22725.2 | 6.31 | HUMAN | <a href="#">IPI00789727</a> | <a href="#">6</a>  | 1 | 15.32 |                      | PKM2 23 kDa protein                                               |
| 0<br>0.00e+000               | <b>3</b><br><b>2.15e+007</b> | 18869.9 | 9.47 | HUMAN | <a href="#">IPI00797668</a> | <a href="#">7</a>  | 1 | 15.32 |                      | PKM2 19 kDa protein                                               |
| 0<br>0.00e+000               | <b>3</b><br><b>2.15e+007</b> | 10094.7 | 6.49 | HUMAN | <a href="#">IPI00798295</a> | <a href="#">14</a> | 1 | 15.32 |                      | PKM2 10 kDa protein                                               |
| 0<br>0.00e+000               | <b>1</b><br><b>2.21e+006</b> | 37276.3 | 8.47 | HUMAN | <a href="#">IPI00847989</a> | <a href="#">3</a>  | 1 | 7.77  |                      | PKM2 Pyruvate kinase (Fragment)                                   |
| <b>3</b><br><b>5.37e+007</b> | 0<br>0.00e+000               | 52286.5 | 6.86 | HUMAN | <a href="#">IPI00010295</a> | <a href="#">6</a>  | 2 | 22.96 | <a href="#">85.1</a> | CPN1 Carboxypeptidase N catalytic chain precursor                 |
| <b>2</b><br><b>7.94e+007</b> | 0<br>0.00e+000               | 22879.6 | 5.17 | HUMAN | <a href="#">IPI00641144</a> | <a href="#">7</a>  | 1 | 13.10 |                      | CPN1 Carboxypeptidase N, polypeptide 1                            |
| <b>1</b><br><b>4.84e+006</b> | <b>1</b><br><b>3.52e+007</b> | 24390.7 | 6.90 | HUMAN | <a href="#">IPI00514285</a> | <a href="#">7</a>  | 1 | 21.85 | <a href="#">86.1</a> | PTGDS Prostaglandin D2 synthase 21kDa                             |
| <b>1</b><br><b>4.84e+006</b> | <b>1</b><br><b>3.52e+007</b> | 22949.1 | 9.92 | HUMAN | <a href="#">IPI00513767</a> | <a href="#">7</a>  | 1 | 21.85 |                      | PTGDS Prostaglandin D2 synthase 21kDa                             |
| <b>1</b><br><b>4.84e+006</b> | <b>1</b><br><b>3.52e+007</b> | 21028.9 | 7.65 | HUMAN | <a href="#">IPI00013179</a> | <a href="#">8</a>  | 1 | 21.85 |                      | PTGDS Prostaglandin-H2 D-isomerase precursor                      |
| <b>1</b><br><b>4.84e+006</b> | <b>1</b><br><b>3.52e+007</b> | 16871.3 | 9.45 | HUMAN | <a href="#">IPI00514208</a> | <a href="#">10</a> | 1 | 21.85 |                      | PTGDS Prostaglandin D2 synthase 21kDa                             |
| <b>2</b><br><b>1.26e+009</b> | 0<br>0.00e+000               | 39749.5 | 5.08 | HUMAN | <a href="#">IPI00218732</a> | <a href="#">4</a>  | 1 | 20.06 | <a href="#">87.1</a> | PON1 Serum paraoxonase/arylesterase 1                             |
| <b>2</b><br><b>1.26e+009</b> | 0<br>0.00e+000               | 31865.4 | 4.82 | HUMAN | <a href="#">IPI00798167</a> | <a href="#">5</a>  | 1 | 20.06 |                      | PON1 32 kDa protein                                               |
| <b>1</b><br><b>2.88e+007</b> | <b>1</b><br><b>5.16e+006</b> | 67047.3 | 8.50 | HUMAN | <a href="#">IPI00294395</a> | <a href="#">2</a>  | 1 | 18.94 | <a href="#">88.1</a> | C8B Complement component C8 beta chain precursor                  |
| 0<br>0.00e+000               | <b>1</b><br><b>1.12e+008</b> | 51778.8 | 5.34 | HUMAN | <a href="#">IPI00296176</a> | <a href="#">1</a>  | 1 | 18.12 | <a href="#">89.1</a> | F9 Coagulation factor IX precursor                                |

|                |                |         |      |       |                             |                    |   |       |                       |                                                                                          |
|----------------|----------------|---------|------|-------|-----------------------------|--------------------|---|-------|-----------------------|------------------------------------------------------------------------------------------|
| 1<br>8.37e+006 | 0<br>0.00e+000 | 43618.1 | 6.96 | HUMAN | <a href="#">IPI00218795</a> | <a href="#">2</a>  | 1 | 17.87 | <a href="#">90.1</a>  | SELL L-selectin precursor                                                                |
| 0<br>0.00e+000 | 2<br>2.01e+008 | 28870.3 | 6.59 | HUMAN | <a href="#">IPI00215983</a> | <a href="#">4</a>  | 1 | 17.82 | <a href="#">91.1</a>  | CA1 Carbonic anhydrase 1                                                                 |
| 0<br>0.00e+000 | 2<br>2.01e+008 | 21549.3 | 7.10 | HUMAN | <a href="#">IPI00796435</a> | <a href="#">6</a>  | 1 | 17.82 |                       | CA1 22 kDa protein                                                                       |
| 0<br>0.00e+000 | 2<br>2.01e+008 | 16254.8 | 9.48 | HUMAN | <a href="#">IPI00788926</a> | <a href="#">8</a>  | 1 | 17.82 |                       | CA1 16 kDa protein                                                                       |
| 0<br>0.00e+000 | 2<br>2.01e+008 | 14008.1 | 9.21 | HUMAN | <a href="#">IPI00798267</a> | <a href="#">9</a>  | 1 | 17.82 |                       | CA1 14 kDa protein                                                                       |
| 2<br>2.77e+007 | 0<br>0.00e+000 | 83268.7 | 5.69 | HUMAN | <a href="#">IPI00884176</a> | <a href="#">1</a>  | 1 | 16.71 | <a href="#">92.1</a>  | F13A1 coagulation factor XIII A1 subunit precursor                                       |
| 2<br>2.77e+007 | 0<br>0.00e+000 | 83267.7 | 5.75 | HUMAN | <a href="#">IPI00297550</a> | <a href="#">1</a>  | 1 | 16.71 |                       | F13A1 Coagulation factor XIII A chain precursor                                          |
| 1<br>9.94e+006 | 0<br>0.00e+000 | 51276.8 | 8.32 | HUMAN | <a href="#">IPI00021364</a> | <a href="#">4</a>  | 1 | 16.62 | <a href="#">93.1</a>  | CFP Properdin precursor                                                                  |
| 2<br>6.26e+007 | 0<br>0.00e+000 | 70682.3 | 6.99 | HUMAN | <a href="#">IPI00029193</a> | <a href="#">2</a>  | 1 | 16.10 | <a href="#">94.1</a>  | HGFAC Hepatocyte growth factor activator precursor                                       |
| 0<br>0.00e+000 | 1<br>4.32e+006 | 91614.9 | 5.85 | HUMAN | <a href="#">IPI00871139</a> | <a href="#">1</a>  | 1 | 15.77 | <a href="#">95.1</a>  | MASP1 92 kDa protein                                                                     |
| 0<br>0.00e+000 | 1<br>4.32e+006 | 79259.3 | 5.41 | HUMAN | <a href="#">IPI00299307</a> | <a href="#">1</a>  | 1 | 15.77 |                       | MASP1 Complement-activating component of Ra-reactive factor precursor                    |
| 1<br>9.91e+006 | 0<br>0.00e+000 | 54641.0 | 4.95 | HUMAN | <a href="#">IPI00029658</a> | <a href="#">2</a>  | 1 | 15.73 | <a href="#">96.1</a>  | EFEMP1 Isoform 1 of EGF-containing fibulin-like extracellular matrix protein 1 precursor |
| 1<br>9.91e+006 | 0<br>0.00e+000 | 54583.9 | 4.95 | HUMAN | <a href="#">IPI00220814</a> | <a href="#">2</a>  | 1 | 15.73 |                       | EFEMP1 Isoform 3 of EGF-containing fibulin-like extracellular matrix protein 1 precursor |
| 1<br>9.91e+006 | 0<br>0.00e+000 | 54553.9 | 4.95 | HUMAN | <a href="#">IPI00220815</a> | <a href="#">2</a>  | 1 | 15.73 |                       | EFEMP1 Isoform 4 of EGF-containing fibulin-like extracellular matrix protein 1 precursor |
| 1<br>9.91e+006 | 0<br>0.00e+000 | 53722.8 | 4.90 | HUMAN | <a href="#">IPI00220813</a> | <a href="#">2</a>  | 1 | 15.73 |                       | EFEMP1 Isoform 2 of EGF-containing fibulin-like extracellular matrix protein 1 precursor |
| 0<br>0.00e+000 | 1<br>1.04e+008 | 54732.0 | 5.68 | HUMAN | <a href="#">IPI00019576</a> | <a href="#">2</a>  | 1 | 15.67 | <a href="#">97.1</a>  | F10 Coagulation factor X precursor                                                       |
| 0<br>0.00e+000 | 1<br>1.04e+008 | 37094.7 | 5.63 | HUMAN | <a href="#">IPI00552633</a> | <a href="#">3</a>  | 1 | 15.67 |                       | F10 Coagulation factor X                                                                 |
| 0<br>0.00e+000 | 1<br>8.41e+006 | 45199.8 | 8.98 | HUMAN | <a href="#">IPI00030363</a> | <a href="#">4</a>  | 1 | 15.67 | <a href="#">98.1</a>  | ACAT1 Acetyl-CoA acetyltransferase, mitochondrial precursor                              |
| 0<br>0.00e+000 | 1<br>8.41e+006 | 17201.5 | 9.98 | HUMAN | <a href="#">IPI00062003</a> | <a href="#">11</a> | 1 | 15.67 |                       | ACAT1 ACAT1 protein                                                                      |
| 1<br>1.72e+007 | 0<br>0.00e+000 | 42155.7 | 8.71 | HUMAN | <a href="#">IPI00829918</a> | <a href="#">5</a>  | 1 | 15.57 | <a href="#">99.1</a>  | - NPAL2 protein                                                                          |
| 0<br>0.00e+000 | 1<br>8.08e+007 | 72698.0 | 6.49 | HUMAN | <a href="#">IPI00031425</a> | <a href="#">2</a>  | 1 | 15.55 | <a href="#">100.1</a> | HAL Histidine ammonia-lyase                                                              |
| 2<br>4.88e+008 | 0<br>0.00e+000 | 50704.6 | 6.62 | HUMAN | <a href="#">IPI00013212</a> | <a href="#">2</a>  | 1 | 15.52 | <a href="#">101.1</a> | CSK Tyrosine-protein kinase CSK                                                          |
| 7<br>1.94e+008 | 2<br>8.86e+008 | 23010.1 | 5.76 | HUMAN | <a href="#">IPI00022420</a> | <a href="#">4</a>  | 1 | 15.46 | <a href="#">102.1</a> | RBP4 Plasma retinol-binding protein precursor                                            |
| 7<br>1.94e+008 | 2<br>8.86e+008 | 22973.9 | 5.77 | HUMAN | <a href="#">IPI00844536</a> | <a href="#">5</a>  | 1 | 15.46 |                       | RBP4 Uncharacterized protein RBP4                                                        |
| 7<br>1.94e+008 | 2<br>8.86e+008 | 22943.9 | 5.77 | HUMAN | <a href="#">IPI00480192</a> | <a href="#">5</a>  | 1 | 15.46 |                       | RBP4 Retinol binding protein 4, plasma                                                   |
| 0<br>0.00e+000 | 2<br>7.70e+006 | 40076.4 | 5.84 | HUMAN | <a href="#">IPI00029260</a> | <a href="#">4</a>  | 1 | 15.34 | <a href="#">103.1</a> | CD14 Monocyte differentiation antigen CD14 precursor                                     |
| 3<br>2.90e+007 | 0<br>0.00e+000 | 43779.4 | 6.22 | HUMAN | <a href="#">IPI00023019</a> | <a href="#">3</a>  | 1 | 15.08 | <a href="#">104.1</a> | SHBG Isoform 1 of Sex hormone-binding globulin precursor                                 |

|                |                |         |      |       |                             |                    |   |       |                       |                                                                          |
|----------------|----------------|---------|------|-------|-----------------------------|--------------------|---|-------|-----------------------|--------------------------------------------------------------------------|
| 3<br>2.90e+007 | 0<br>0.00e+000 | 31829.5 | 5.93 | HUMAN | <a href="#">IPI00219583</a> | <a href="#">4</a>  | 1 | 15.08 |                       | SHBG Isoform 2 of Sex hormone-binding globulin precursor                 |
| 3<br>2.90e+007 | 0<br>0.00e+000 | 28666.3 | 5.32 | HUMAN | <a href="#">IPI00884913</a> | <a href="#">5</a>  | 1 | 15.08 |                       | - Sex hormone binding globulin (Fragment)                                |
| 1<br>1.78e+007 | 0<br>0.00e+000 | 26721.9 | 8.83 | HUMAN | <a href="#">IPI00477992</a> | <a href="#">3</a>  | 1 | 14.87 | <a href="#">105.1</a> | C1QB complement component 1, q subcomponent, B chain precursor           |
| 1<br>1.78e+007 | 0<br>0.00e+000 | 24380.2 | 9.26 | HUMAN | <a href="#">IPI00643948</a> | <a href="#">3</a>  | 1 | 14.87 |                       | C1QB Complement component 1, q subcomponent, B chain                     |
| 0<br>0.00e+000 | 1<br>7.68e+006 | 35531.5 | 8.92 | HUMAN | <a href="#">IPI00291006</a> | <a href="#">3</a>  | 1 | 14.63 | <a href="#">106.1</a> | MDH2 Malate dehydrogenase, mitochondrial precursor                       |
| 0<br>0.00e+000 | 1<br>1.48e+007 | 47716.4 | 5.92 | HUMAN | <a href="#">IPI00012007</a> | <a href="#">2</a>  | 1 | 13.86 | <a href="#">107.1</a> | AHCY Adenosylhomocysteinase                                              |
| 2<br>7.12e+006 | 1<br>7.90e+006 | 26413.8 | 5.43 | HUMAN | <a href="#">IPI00020019</a> | <a href="#">6</a>  | 1 | 13.86 | <a href="#">108.1</a> | ADIPOQ Adiponectin precursor                                             |
| 0<br>0.00e+000 | 1<br>1.42e+008 | 10834.6 | 6.51 | HUMAN | <a href="#">IPI00007047</a> | <a href="#">11</a> | 1 | 13.72 | <a href="#">109.1</a> | S100A8 Protein S100-A8                                                   |
| 0<br>0.00e+000 | 1<br>2.33e+006 | 76684.9 | 4.86 | HUMAN | <a href="#">IPI00017696</a> | <a href="#">1</a>  | 1 | 13.66 | <a href="#">110.1</a> | C1S Complement C1s subcomponent precursor                                |
| 0<br>0.00e+000 | 1<br>2.33e+006 | 75906.0 | 5.09 | HUMAN | <a href="#">IPI00749179</a> | <a href="#">1</a>  | 1 | 13.66 |                       | C1S Uncharacterized protein C1S                                          |
| 0<br>0.00e+000 | 1<br>2.33e+006 | 20585.3 | 5.00 | HUMAN | <a href="#">IPI00790679</a> | <a href="#">4</a>  | 1 | 13.66 |                       | C1S 21 kDa protein                                                       |
| 1<br>4.59e+007 | 0<br>0.00e+000 | 78182.0 | 9.32 | HUMAN | <a href="#">IPI00398310</a> | <a href="#">1</a>  | 1 | 13.65 | <a href="#">111.1</a> | ZNF573 Isoform 1 of Zinc finger protein 573                              |
| 1<br>4.59e+007 | 0<br>0.00e+000 | 70843.5 | 9.40 | HUMAN | <a href="#">IPI00418297</a> | <a href="#">1</a>  | 1 | 13.65 |                       | ZNF573 Isoform 3 of Zinc finger protein 573                              |
| 1<br>4.59e+007 | 0<br>0.00e+000 | 67866.2 | 9.42 | HUMAN | <a href="#">IPI00827652</a> | <a href="#">1</a>  | 1 | 13.65 |                       | ZNF573 Isoform 4 of Zinc finger protein 573                              |
| 1<br>4.59e+007 | 0<br>0.00e+000 | 67782.0 | 9.41 | HUMAN | <a href="#">IPI00827764</a> | <a href="#">1</a>  | 1 | 13.65 |                       | ZNF573 Isoform 2 of Zinc finger protein 573                              |
| 1<br>1.59e+007 | 1<br>1.51e+007 | 74681.3 | 7.62 | HUMAN | <a href="#">IPI00018219</a> | <a href="#">1</a>  | 1 | 13.04 | <a href="#">112.1</a> | TGFBI Transforming growth factor-beta-induced protein ig-h3 precursor    |
| 1<br>1.59e+007 | 1<br>1.51e+007 | 45414.4 | 6.24 | HUMAN | <a href="#">IPI00873923</a> | <a href="#">2</a>  | 1 | 13.04 |                       | TGFBI TGFBI protein                                                      |
| 1<br>1.59e+007 | 1<br>1.51e+007 | 25846.7 | 5.33 | HUMAN | <a href="#">IPI00556324</a> | <a href="#">4</a>  | 1 | 13.04 |                       | TGFBI Transforming growth factor, beta-induced, 68kDa variant (Fragment) |
| 0<br>0.00e+000 | 1<br>1.60e+007 | 55114.1 | 7.22 | HUMAN | <a href="#">IPI00007199</a> | <a href="#">3</a>  | 1 | 12.97 | <a href="#">113.1</a> | SERPINA10 Protein Z-dependent protease inhibitor precursor               |
| 0<br>0.00e+000 | 1<br>1.40e+008 | 25977.2 | 6.29 | HUMAN | <a href="#">IPI00382938</a> | <a href="#">6</a>  | 1 | 12.75 | <a href="#">114.1</a> | IGLV4-3 IGLV4-3 protein                                                  |
| 0<br>0.00e+000 | 1<br>1.40e+008 | 25148.3 | 6.19 | HUMAN | <a href="#">IPI00719373</a> | <a href="#">6</a>  | 1 | 12.75 |                       | IGL@ IGL@ protein                                                        |
| 0<br>0.00e+000 | 1<br>1.40e+008 | 25108.2 | 8.17 | HUMAN | <a href="#">IPI00784711</a> | <a href="#">6</a>  | 1 | 12.75 |                       | - Putative uncharacterized protein                                       |
| 0<br>0.00e+000 | 1<br>1.40e+008 | 25024.1 | 7.59 | HUMAN | <a href="#">IPI00785200</a> | <a href="#">6</a>  | 1 | 12.75 |                       | - Putative uncharacterized protein                                       |
| 0<br>0.00e+000 | 1<br>1.40e+008 | 25021.1 | 8.14 | HUMAN | <a href="#">IPI00658130</a> | <a href="#">6</a>  | 1 | 12.75 |                       | IGL@ IGL@ protein                                                        |
| 0<br>0.00e+000 | 1<br>1.40e+008 | 25015.1 | 5.94 | HUMAN | <a href="#">IPI00784519</a> | <a href="#">6</a>  | 1 | 12.75 |                       | - Putative uncharacterized protein                                       |
| 0<br>0.00e+000 | 1<br>1.40e+008 | 25002.3 | 6.88 | HUMAN | <a href="#">IPI00784589</a> | <a href="#">6</a>  | 1 | 12.75 |                       | - Putative uncharacterized protein DKFZp781M0386                         |
| 0<br>0.00e+000 | 1<br>1.40e+008 | 24969.9 | 6.51 | HUMAN | <a href="#">IPI00785079</a> | <a href="#">6</a>  | 1 | 12.75 |                       | - Putative uncharacterized protein                                       |
| 0<br>0.00e+000 | 1<br>1.40e+008 | 24960.9 | 5.21 | HUMAN | <a href="#">IPI00829626</a> | <a href="#">6</a>  | 1 | 12.75 |                       | IGL@ IGL@ protein                                                        |

|                |                |          |      |       |                             |                    |   |       |                       |                                                      |
|----------------|----------------|----------|------|-------|-----------------------------|--------------------|---|-------|-----------------------|------------------------------------------------------|
| 0<br>0.00e+000 | 1<br>1.40e+008 | 24950.0  | 6.41 | HUMAN | <a href="#">IPI00784983</a> | <a href="#">6</a>  | 1 | 12.75 |                       | - Putative uncharacterized protein                   |
| 0<br>0.00e+000 | 1<br>1.40e+008 | 24927.9  | 6.81 | HUMAN | <a href="#">IPI00784713</a> | <a href="#">6</a>  | 1 | 12.75 |                       | - Putative uncharacterized protein                   |
| 0<br>0.00e+000 | 1<br>1.40e+008 | 24909.9  | 6.19 | HUMAN | <a href="#">IPI00785050</a> | <a href="#">6</a>  | 1 | 12.75 |                       | - Putative uncharacterized protein                   |
| 0<br>0.00e+000 | 1<br>1.40e+008 | 24898.9  | 6.50 | HUMAN | <a href="#">IPI00815938</a> | <a href="#">6</a>  | 1 | 12.75 |                       | IGLV3-21 IGLV3-21 protein                            |
| 0<br>0.00e+000 | 1<br>1.40e+008 | 24887.9  | 6.28 | HUMAN | <a href="#">IPI00450309</a> | <a href="#">6</a>  | 1 | 12.75 |                       | IGL @ IGL @ protein                                  |
| 0<br>0.00e+000 | 1<br>1.40e+008 | 24866.9  | 5.23 | HUMAN | <a href="#">IPI00550162</a> | <a href="#">6</a>  | 1 | 12.75 |                       | IGLV3-25 IGLV3-25 protein                            |
| 0<br>0.00e+000 | 1<br>1.40e+008 | 24857.8  | 7.59 | HUMAN | <a href="#">IPI00745660</a> | <a href="#">6</a>  | 1 | 12.75 |                       | IGL @ IGL @ protein                                  |
| 0<br>0.00e+000 | 1<br>1.40e+008 | 24854.9  | 6.29 | HUMAN | <a href="#">IPI00829640</a> | <a href="#">6</a>  | 1 | 12.75 |                       | IGL @ IGL @ protein                                  |
| 0<br>0.00e+000 | 1<br>1.40e+008 | 24852.9  | 8.74 | HUMAN | <a href="#">IPI00885076</a> | <a href="#">6</a>  | 1 | 12.75 |                       | IGLC2;IGLV2-14;IGLC3;IGLC1 IGLV2-14 protein          |
| 0<br>0.00e+000 | 1<br>1.40e+008 | 24823.7  | 6.28 | HUMAN | <a href="#">IPI00744476</a> | <a href="#">6</a>  | 1 | 12.75 |                       | IGL @ IGL @ protein                                  |
| 0<br>0.00e+000 | 1<br>1.40e+008 | 24803.7  | 7.60 | HUMAN | <a href="#">IPI00784627</a> | <a href="#">6</a>  | 1 | 12.75 |                       | - Putative uncharacterized protein                   |
| 0<br>0.00e+000 | 1<br>1.40e+008 | 24802.0  | 5.92 | HUMAN | <a href="#">IPI00888118</a> | <a href="#">6</a>  | 1 | 12.75 |                       | IGLC1 IGLC1 protein                                  |
| 0<br>0.00e+000 | 1<br>1.40e+008 | 24799.7  | 6.88 | HUMAN | <a href="#">IPI00555945</a> | <a href="#">6</a>  | 1 | 12.75 |                       | IGL @ IGL @ protein                                  |
| 0<br>0.00e+000 | 1<br>1.40e+008 | 24792.7  | 5.93 | HUMAN | <a href="#">IPI00154742</a> | <a href="#">6</a>  | 1 | 12.75 |                       | IGL @ IGL @ protein                                  |
| 0<br>0.00e+000 | 1<br>1.40e+008 | 24746.9  | 5.66 | HUMAN | <a href="#">IPI00807428</a> | <a href="#">6</a>  | 1 | 12.75 |                       | - Putative uncharacterized protein                   |
| 0<br>0.00e+000 | 1<br>1.40e+008 | 24712.7  | 6.88 | HUMAN | <a href="#">IPI00785164</a> | <a href="#">6</a>  | 1 | 12.75 |                       | - Putative uncharacterized protein                   |
| 0<br>0.00e+000 | 1<br>1.40e+008 | 24700.6  | 6.40 | HUMAN | <a href="#">IPI00719452</a> | <a href="#">6</a>  | 1 | 12.75 |                       | IGL @ IGL @ protein                                  |
| 0<br>0.00e+000 | 1<br>1.40e+008 | 24696.8  | 5.89 | HUMAN | <a href="#">IPI00718819</a> | <a href="#">6</a>  | 1 | 12.75 |                       | IGL @;IGLC2;IGLV2-14;IGLC3;IGLC1 IGLV2-14 protein    |
| 0<br>0.00e+000 | 1<br>1.40e+008 | 24654.7  | 7.54 | HUMAN | <a href="#">IPI00827875</a> | <a href="#">6</a>  | 1 | 12.75 |                       | - Lambda-chain precursor                             |
| 0<br>0.00e+000 | 1<br>1.40e+008 | 24653.8  | 5.94 | HUMAN | <a href="#">IPI00784935</a> | <a href="#">6</a>  | 1 | 12.75 |                       | IGL @ IGL @ protein                                  |
| 0<br>0.00e+000 | 1<br>1.40e+008 | 24632.6  | 6.88 | HUMAN | <a href="#">IPI00785196</a> | <a href="#">6</a>  | 1 | 12.75 |                       | - Putative uncharacterized protein                   |
| 0<br>0.00e+000 | 1<br>1.40e+008 | 24509.3  | 6.81 | HUMAN | <a href="#">IPI00816555</a> | <a href="#">6</a>  | 1 | 12.75 |                       | IGLV2-14 IGLV2-14 protein                            |
| 0<br>0.00e+000 | 1<br>1.40e+008 | 11403.8  | 7.89 | HUMAN | <a href="#">IPI00852577</a> | <a href="#">14</a> | 1 | 12.75 |                       | - C1 segment protein                                 |
| 0<br>0.00e+000 | 1<br>1.40e+008 | 11358.8  | 8.49 | HUMAN | <a href="#">IPI00642632</a> | <a href="#">14</a> | 1 | 12.75 |                       | - C7 protein                                         |
| 0<br>0.00e+000 | 1<br>1.40e+008 | 11302.7  | 6.91 | HUMAN | <a href="#">IPI00830047</a> | <a href="#">14</a> | 1 | 12.75 |                       | - Uncharacterized protein ENSP00000374858 (Fragment) |
| 3<br>2.21e+008 | 0<br>0.00e+000 | 135578.1 | 5.13 | HUMAN | <a href="#">IPI00300371</a> | <a href="#">0</a>  | 1 | 12.32 | <a href="#">115.1</a> | SF3B3 Isoform 1 of Splicing factor 3B subunit 3      |
| 3<br>2.21e+008 | 0<br>0.00e+000 | 30209.9  | 6.07 | HUMAN | <a href="#">IPI00179138</a> | <a href="#">4</a>  | 1 | 12.32 |                       | SF3B3 Isoform 2 of Splicing factor 3B subunit 3      |
| 1<br>3.45e+007 | 0<br>0.00e+000 | 72883.7  | 7.48 | HUMAN | <a href="#">IPI00025864</a> | <a href="#">1</a>  | 1 | 11.93 | <a href="#">116.1</a> | BCHE Cholinesterase precursor                        |



|                |                |         |      |       |                             |                   |   |       |                       |                                                                           |
|----------------|----------------|---------|------|-------|-----------------------------|-------------------|---|-------|-----------------------|---------------------------------------------------------------------------|
| 0<br>0.00e+000 | 1<br>4.24e+006 | 25322.6 | 8.15 | HUMAN | <a href="#">IPI00029235</a> | <a href="#">5</a> | 1 | 11.81 | <a href="#">117.1</a> | IGFBP6 Insulin-like growth factor-binding protein 6 precursor             |
| 0<br>0.00e+000 | 1<br>5.27e+007 | 99849.7 | 5.49 | HUMAN | <a href="#">IPI00028413</a> | <a href="#">1</a> | 1 | 11.77 | <a href="#">118.1</a> | ITIH3 Isoform 1 of Inter-alpha-trypsin inhibitor heavy chain H3 precursor |
| 0<br>0.00e+000 | 1<br>5.27e+007 | 99328.1 | 5.52 | HUMAN | <a href="#">IPI00876950</a> | <a href="#">1</a> | 1 | 11.77 |                       | ITIH3 Isoform 2 of Inter-alpha-trypsin inhibitor heavy chain H3 precursor |
| 0<br>0.00e+000 | 1<br>5.27e+007 | 75078.5 | 5.59 | HUMAN | <a href="#">IPI00873416</a> | <a href="#">2</a> | 1 | 11.77 |                       | ITIH3 Uncharacterized protein ITIH3                                       |
| 0<br>0.00e+000 | 1<br>7.89e+006 | 78439.4 | 6.88 | HUMAN | <a href="#">IPI00015481</a> | <a href="#">1</a> | 1 | 11.02 | <a href="#">119.1</a> | ZNF408 Zinc finger protein 408                                            |

Summarize Results for Review

Validation and Sorting

Review Fields

Mode:

Group results by: File 

Directory

Data directories:

101215TMMU\_HJY

101220TMMU\_HJY

Search result files:

Filter results by:

Protein grouping method:

Sort proteins by:

Filter by protein score:

Filter peptides by:

Score:

% SPI:

Required AAs:

Disallowed AAs:

Accession #'s:

Filename

Score

Intensity

Protein MW

Protein pl

Species

Accession #

Protein name

Excel export

DEQ ratios

Invert

iTRAQ ratios control:

Category

http://offline/millhtml/summaryframe.htm (16 of 16) [2010-12-24 14:55:37]
