# Supplementary material for: Identification of Differentially Expressed Serum Proteins in Infectious Purpura Fulminans
Source: Dis Markers. 2014 Feb 10;2014:698383. doi: 10.1155/2014/698383 (PMC3934775; doi:10.1155/2014/698383)
Supplement: Supplementary file 1 — S1: The raw result of the Spectrum Mill proteomics analysis. Supplemental materials: The MS parameters and the database search parameters setting. Table S1: The raw result of biological processes based on GO analysis by DAVID. Table S2: The raw result of molecular functions based on GO analysis by DAVID. Table S3: The raw result of cellular components based on GO analysis by DAVID. Table S4: The raw result of physiological pathways enrichment analysis by DAVID. [file 698383.f1.zip]

Archive with 6 entries (6 files):
- S1.pdf
- supplementary materials.doc
- Table S1.xls
- Table S2.xls
- Table S3.xls
- Table S4.xls
