# Supplementary material for: Identification of Differentially Expressed Serum Proteins in Infectious Purpura Fulminans
Source: Dis Markers. 2014 Feb 10;2014:698383. doi: 10.1155/2014/698383 (PMC3934775; doi:10.1155/2014/698383)
Supplement: Supplementary file 1 — S1: The raw result of the Spectrum Mill proteomics analysis. Supplemental materials: The MS parameters and the database search parameters setting. Table S1: The raw result of biological processes based on GO analysis by DAVID. Table S2: The raw result of molecular functions based on GO analysis by DAVID. Table S3: The raw result of cellular components based on GO analysis by DAVID. Table S4: The raw result of physiological pathways enrichment analysis by DAVID. [file 698383.f1.zip › Table S1.xls]

## Sheet: chart_gobp
Category	Term	Count	%	PValue	Genes	List Total	Pop Hits	Pop Total	Fold Enrichment	Benjamini
GOTERM_BP_ALL	GO:0002526~acute inflammatory response	39	29.5455	2.86656e-54	C7, A2M, YWHAZ, C9, MASP1, C3, CLU, CRP, C5, C1R, C1S, C1QC, AHSG, CFP, APOA2, LOC100133511, SAA1, KLKB1, CFH, ITIH4, SERPINA3, SERPINA1, C2, CFI, LBP, APCS, C4B, CFB, SAA4, C4BPB, SERPING1, C4BPA, C8G, C8A, ORM1, C1QB, C8B, SERPINF2, F2, ORM2	126	98	14116	44.5841	4.42023e-51
GOTERM_BP_ALL	GO:0009611~response to wounding	56	42.4242	2.69954e-45	A2M, S100A8, MASP1, F13A1, CRP, C1QC, CFP, APOA2, GSN, SAA1, SERPINA3, APOH, ITIH4, CFH, SERPINA1, CFI, LBP, KNG1, APCS, F10, C4B, F9, SAA4, SERPING1, F7, C8G, C8A, C8B, C1QB, F5, SERPINF2, F2, C7, YWHAZ, SERPINA10, C9, C3, C5, CLU, C1R, C1S, AHSG, LOC100133511, FGA, FGB, KLKB1, SERPINC1, C2, CFB, ATRN, C4BPB, C4BPA, PLG, ORM1, SERPIND1, ORM2, CD14	126	530	14116	11.8373	2.08135e-42
GOTERM_BP_ALL	GO:0009605~response to external stimulus	63	47.7273	1.58513e-40	A2M, MASP1, S100A8, F13A1, CRP, C1QC, CFP, APOA2, GSN, SAA1, PGLYRP2, SERPINA3, APOH, ITIH4, CFH, SERPINA1, CFI, LBP, KNG1, APCS, F10, C4B, F9, SAA4, SERPING1, F7, C8G, C8A, C8B, C1QB, F5, SERPINF2, F2, C7, RBP4, YWHAZ, SERPINA10, C9, C3, C5, CLU, ALDOB, C1R, C1S, AHSG, LOC100133511, FGA, BCHE, FGB, KLKB1, SERPINC1, C2, CFB, ATRN, C4BPB, C4BPA, ADIPOQ, PLG, ORM1, PON1, SERPIND1, CP, ORM2, CD14	126	914	14116	7.7221	8.14755e-38
GOTERM_BP_ALL	GO:0006954~inflammatory response	43	32.5758	6.78332e-38	C7, A2M, YWHAZ, C9, MASP1, S100A8, C3, CLU, CRP, C5, C1R, C1S, C1QC, AHSG, CFP, APOA2, LOC100133511, SAA1, KLKB1, SERPINA3, CFH, ITIH4, SERPINA1, C2, CFI, LBP, KNG1, APCS, C4B, CFB, ATRN, SAA4, C4BPB, SERPING1, C4BPA, C8G, C8A, ORM1, C1QB, C8B, SERPINF2, F2, ORM2, CD14	126	325	14116	14.8227	2.61497e-35
GOTERM_BP_ALL	GO:0006956~complement activation	23	17.4242	4.36015e-35	C7, C9, MASP1, CFB, C4B, C3, CLU, C5, CRP, C4BPB, SERPING1, C1R, C4BPA, C1S, C1QC, C8G, C8A, CFP, C8B, C1QB, LOC100133511, CFH, CFI, C2	126	42	14116	61.3507	1.34467e-32
GOTERM_BP_ALL	GO:0048583~regulation of response to stimulus	46	34.8485	4.56682e-35	RBP4, C7, A2M, C9, MASP1, C3, CLU, CRP, C5, C1R, C1S, C1QC, AHSG, CFP, APOA2, APOA1, LOC100133511, SAA1, APOE, AGT, KLKB1, SERPINC1, CFH, APOH, HRG, C2, CFI, LBP, KNG1, C4B, CFB, C4BPB, SERPING1, F7, C4BPA, ADIPOQ, PLG, C8G, AMBP, C8A, C1QB, C8B, SERPINF1, PTGDS, SERPINF2, HPX, F2	126	465	14116	11.0827	1.17367e-32
GOTERM_BP_ALL	GO:0002541~activation of plasma proteins involved in acute inflammatory response	23	17.4242	8.86259e-35	C7, C9, MASP1, CFB, C4B, C3, CLU, C5, CRP, C4BPB, SERPING1, C1R, C4BPA, C1S, C1QC, C8G, C8A, CFP, C8B, C1QB, LOC100133511, CFH, CFI, C2	126	43	14116	59.924	1.9523e-32
GOTERM_BP_ALL	GO:0006958~complement activation, classical pathway	19	14.3939	9.96858e-31	C7, C9, C4B, C3, CLU, C5, CRP, C4BPB, SERPING1, C1R, C4BPA, C1S, C1QC, C8G, C8A, C8B, C1QB, LOC100133511, CFI, C2	126	29	14116	73.4001	1.92144e-28
GOTERM_BP_ALL	GO:0051605~protein maturation by peptide bond cleavage	25	18.9394	4.12538e-30	C7, C9, MASP1, C3, CLU, C5, CRP, C1R, C1S, C1QC, CFP, LOC100133511, KLKB1, CFH, APOH, C2, CFI, C4B, CFB, SERPING1, C4BPB, C4BPA, C8G, C8A, C8B, C1QB	126	86	14116	32.5674	7.06816e-28
GOTERM_BP_ALL	GO:0002455~humoral immune response mediated by circulating immunoglobulin	19	14.3939	5.85287e-30	C7, C9, C4B, C3, CLU, C5, CRP, C4BPB, SERPING1, C1R, C4BPA, C1S, C1QC, C8G, C8A, C8B, C1QB, LOC100133511, CFI, C2	126	31	14116	68.6646	9.02513e-28
GOTERM_BP_ALL	GO:0006952~defense response	46	34.8485	9.49772e-30	C7, A2M, YWHAZ, C9, MASP1, S100A8, C3, CLU, CRP, C5, C1R, HP, C1S, C1QC, AHSG, APOA4, CFP, APOA2, LOC100133511, SAA1, PGLYRP2, KLKB1, SERPINA3, ITIH4, CFH, SERPINA1, C2, CFI, LBP, KNG1, APCS, CFB, C4B, ATRN, SAA4, C4BPB, SERPING1, C4BPA, HPR, C8G, C8A, ORM1, C1QB, C8B, SERPINF2, F2, ORM2, CD14	126	615	14116	8.37961	1.33141e-27
GOTERM_BP_ALL	GO:0006959~humoral immune response	23	17.4242	1.26957e-27	C7, C9, MASP1, CFB, C4B, C3, CLU, C5, CRP, C4BPB, SERPING1, C1R, C4BPA, C1S, C1QC, C8G, C8A, CFP, C8B, C1QB, LOC100133511, CFH, CFI, C2	126	79	14116	32.6168	1.6314e-25
GOTERM_BP_ALL	GO:0006950~response to stress	65	49.2424	4.65592e-27	A2M, MASP1, S100A8, F13A1, CRP, HP, C1QC, APOA4, CFP, APOA2, GSN, SAA1, APOE, PGLYRP2, GPX3, APOH, ITIH4, CFH, SERPINA3, SERPINA1, CFI, LBP, KNG1, APCS, F10, C4B, F9, SAA4, SERPING1, F7, C8G, C8A, C8B, C1QB, F5, SERPINF2, F2, C7, YWHAZ, SERPINA10, C9, C3, C5, CLU, ALDOB, C1R, C1S, AHSG, LOC100133511, FGA, FGB, AGT, KLKB1, SERPINC1, HSPE1, C2, CFB, ATRN, C4BPB, C4BPA, ADIPOQ, HPR, PLG, ORM1, SERPI…	126	1685	14116	4.3217	5.52264e-25
GOTERM_BP_ALL	GO:0016485~protein processing	25	18.9394	4.72673e-27	C7, C9, MASP1, C3, CLU, C5, CRP, C1R, C1S, C1QC, CFP, LOC100133511, KLKB1, CFH, APOH, C2, CFI, C4B, CFB, SERPING1, C4BPB, C4BPA, C8G, C8A, C8B, C1QB	126	112	14116	25.0071	5.20615e-25
GOTERM_BP_ALL	GO:0051604~protein maturation	25	18.9394	4.32643e-26	C7, C9, MASP1, C3, CLU, C5, CRP, C1R, C1S, C1QC, CFP, LOC100133511, KLKB1, CFH, APOH, C2, CFI, C4B, CFB, SERPING1, C4BPB, C4BPA, C8G, C8A, C8B, C1QB	126	122	14116	22.9573	4.44757e-24
GOTERM_BP_ALL	GO:0050776~regulation of immune response	30	22.7273	7.37024e-26	RBP4, C7, A2M, C9, MASP1, C3, CLU, CRP, C5, C1R, C1S, C1QC, CFP, APOA2, APOA1, LOC100133511, CFH, C2, LBP, CFI, C4B, CFB, SERPING1, C4BPB, C4BPA, C8G, C8A, AMBP, C1QB, C8B, HPX	126	226	14116	14.8715	7.10307e-24
GOTERM_BP_ALL	GO:0002253~activation of immune response	23	17.4242	9.14413e-26	C7, C9, MASP1, CFB, C4B, C3, CLU, C5, CRP, C4BPB, SERPING1, C1R, C4BPA, C1S, C1QC, C8G, C8A, CFP, C8B, C1QB, LOC100133511, CFH, CFI, C2	126	94	14116	27.412	8.29427e-24
GOTERM_BP_ALL	GO:0002252~immune effector process	25	18.9394	4.75085e-25	C7, YWHAZ, C9, MASP1, C3, CLU, C5, CRP, C1R, C1S, C1QC, CFP, LOC100133511, CFH, LBP, C2, CFI, C4B, CFB, SERPING1, C4BPB, C4BPA, C8G, C8A, C8B, C1QB	126	134	14116	20.9014	4.0699e-23
GOTERM_BP_ALL	GO:0045087~innate immune response	25	18.9394	1.00029e-24	C7, C9, MASP1, C3, CLU, C5, C1R, C1S, C1QC, CFP, APOA4, LOC100133511, PGLYRP2, CFH, LBP, C2, CFI, C4B, CFB, SERPING1, C4BPB, C4BPA, C8G, C8A, C8B, C1QB	126	138	14116	20.2956	8.11811e-23
GOTERM_BP_ALL	GO:0016064~immunoglobulin mediated immune response	19	14.3939	2.3077e-24	C7, C9, C4B, C3, CLU, C5, CRP, C4BPB, SERPING1, C1R, C4BPA, C1S, C1QC, C8G, C8A, C8B, C1QB, LOC100133511, CFI, C2	126	54	14116	39.4186	1.77923e-22
GOTERM_BP_ALL	GO:0050778~positive regulation of immune response	25	18.9394	3.47578e-24	C7, C9, MASP1, C3, CLU, C5, CRP, C1R, C1S, C1QC, CFP, LOC100133511, CFH, LBP, C2, CFI, C4B, CFB, SERPING1, C4BPB, C4BPA, C8G, C8A, C8B, C1QB, HPX	126	145	14116	19.3158	2.55222e-22
GOTERM_BP_ALL	GO:0019724~B cell mediated immunity	19	14.3939	4.97863e-24	C7, C9, C4B, C3, CLU, C5, CRP, C4BPB, SERPING1, C1R, C4BPA, C1S, C1QC, C8G, C8A, C8B, C1QB, LOC100133511, CFI, C2	126	56	14116	38.0108	3.48956e-22
GOTERM_BP_ALL	GO:0002682~regulation of immune system process	34	25.7576	1.02214e-23	RBP4, C7, A2M, C9, MASP1, C3, CLU, CRP, C5, C1R, C1S, C1QC, CFP, APOA2, APOA1, LOC100133511, CFH, C2, CFI, LBP, C4B, CFB, SERPING1, C4BPB, F7, C4BPA, ADIPOQ, C8G, C8A, AMBP, ORM1, C1QB, C8B, HPX, ORM2	126	385	14116	9.89371	6.85281e-22
GOTERM_BP_ALL	GO:0050896~response to stimulus	84	63.6364	7.25593e-23	IGHG1, IGHG2, A2M, IGHG3, IGHG4, MASP1, S100A8, F13A1, CRP, HP, VTN, IGHM, C1QC, APOA4, CFP, AZGP1, APOB, APOA2, SERPINA7, GSN, APOE, SAA1, PGLYRP2, TGFBI, GPX3, APOH, ITIH4, CFH, SERPINA3, SERPINA1, CFI, LBP, KNG1, F10, APCS, C4B, IGL@, SAA4, F9, SERPING1, F7, C8G, C8A, C8B, C1QB, IGKV1-5, F5, PTGDS, SERPINF2, F2, C7, RBP4, YWHAZ, SERPINA10, C9, C3, ALDOB, CLU, C5, C1R, C1S, AHSG, CPN1, LOC10013…	126	3502	14116	2.68723	4.66194e-21
GOTERM_BP_ALL	GO:0002449~lymphocyte mediated immunity	19	14.3939	4.88706e-22	C7, C9, C4B, C3, CLU, C5, CRP, C4BPB, SERPING1, C1R, C4BPA, C1S, C1QC, C8G, C8A, C8B, C1QB, LOC100133511, CFI, C2	126	70	14116	30.4086	3.01434e-20
GOTERM_BP_ALL	GO:0002443~leukocyte mediated immunity	20	15.1515	7.82248e-22	C7, YWHAZ, C9, C4B, C3, CLU, C5, CRP, C4BPB, SERPING1, C1R, C4BPA, C1S, C1QC, C8G, C8A, C8B, C1QB, LOC100133511, CFI, C2	126	86	14116	26.0539	4.63934e-20
GOTERM_BP_ALL	GO:0048584~positive regulation of response to stimulus	27	20.4545	1.75228e-21	C7, C9, MASP1, C3, CLU, C5, CRP, C1R, C1S, C1QC, CFP, LOC100133511, AGT, CFH, LBP, CFI, C2, C4B, CFB, SERPING1, C4BPB, F7, C4BPA, C8G, C8A, C1QB, C8B, HPX	126	236	14116	12.8172	1.00075e-19
GOTERM_BP_ALL	GO:0002460~adaptive immune response based on somatic recombination of immune receptors built from immunoglobulin superfamily domains	19	14.3939	3.26536e-21	C7, C9, C4B, C3, CLU, C5, CRP, C4BPB, SERPING1, C1R, C4BPA, C1S, C1QC, C8G, C8A, C8B, C1QB, LOC100133511, CFI, C2	126	77	14116	27.6442	1.79828e-19
GOTERM_BP_ALL	GO:0002250~adaptive immune response	19	14.3939	3.26536e-21	C7, C9, C4B, C3, CLU, C5, CRP, C4BPB, SERPING1, C1R, C4BPA, C1S, C1QC, C8G, C8A, C8B, C1QB, LOC100133511, CFI, C2	126	77	14116	27.6442	1.79828e-19
GOTERM_BP_ALL	GO:0002684~positive regulation of immune system process	26	19.697	3.66356e-20	C7, C9, MASP1, C3, CLU, C5, CRP, C1R, C1S, C1QC, CFP, LOC100133511, CFH, LBP, CFI, C2, C4B, CFB, SERPING1, C4BPB, F7, C4BPA, C8G, C8A, C1QB, C8B, HPX	126	238	14116	12.2388	1.948e-18
GOTERM_BP_ALL	GO:0050817~coagulation	19	14.3939	7.47208e-19	KNG1, F10, C9, F13A1, F9, C4BPB, SERPING1, F7, PLG, FGA, F5, SAA1, FGB, KLKB1, F2, SERPINC1, APOH, SERPINA1, SERPIND1	126	102	14116	20.8687	3.84065e-17
GOTERM_BP_ALL	GO:0007596~blood coagulation	19	14.3939	7.47208e-19	KNG1, F10, C9, F13A1, F9, C4BPB, SERPING1, F7, PLG, FGA, F5, SAA1, FGB, KLKB1, F2, SERPINC1, APOH, SERPINA1, SERPIND1	126	102	14116	20.8687	3.84065e-17
GOTERM_BP_ALL	GO:0006955~immune response	37	28.0303	1.16705e-18	IGHG1, C7, IGHG2, YWHAZ, IGHG3, IGHG4, C9, MASP1, C3, CLU, CRP, C5, C1R, VTN, C1S, IGHM, C1QC, APOA4, CFP, AZGP1, LOC100133511, PGLYRP2, CFH, C2, CFI, LBP, IGKC, C4B, CFB, IGL@, C4BPB, SERPING1, C4BPA, C8G, C8A, C1QB, C8B, IGKV1-5, IGKV3-20, IGHV4-31, CD14	126	690	14116	6.0075	5.80513e-17
GOTERM_BP_ALL	GO:0007599~hemostasis	19	14.3939	2.19325e-18	KNG1, F10, C9, F13A1, F9, C4BPB, SERPING1, F7, PLG, FGA, F5, SAA1, FGB, KLKB1, F2, SERPINC1, APOH, SERPINA1, SERPIND1	126	108	14116	19.7093	1.05687e-16
GOTERM_BP_ALL	GO:0006957~complement activation, alternative pathway	11	8.33333	5.92491e-18	C8A, CFP, C8B, C7, LOC100133511, C9, C3, CFB, C5, CFH, C2, C8G	126	15	14116	82.1566	2.76855e-16
GOTERM_BP_ALL	GO:0006953~acute-phase response	14	10.6061	1.05261e-17	A2M, APCS, CRP, SAA4, AHSG, ORM1, SERPINF2, SAA1, F2, ITIH4, SERPINA3, SERPINA1, LBP, ORM2	126	40	14116	39.2111	4.77389e-16
GOTERM_BP_ALL	GO:0032101~regulation of response to external stimulus	20	15.1515	1.47965e-16	KNG1, A2M, MASP1, C3, SERPING1, F7, ADIPOQ, PLG, AHSG, LOC100133511, SERPINF1, SAA1, SERPINF2, APOE, AGT, KLKB1, F2, APOH, SERPINC1, HRG, LBP	126	159	14116	14.092	4.88498e-15
GOTERM_BP_ALL	GO:0050878~regulation of body fluid levels	19	14.3939	2.98394e-16	KNG1, F10, C9, F13A1, F9, C4BPB, SERPING1, F7, PLG, FGA, F5, SAA1, FGB, KLKB1, F2, SERPINC1, APOH, SERPINA1, SERPIND1	126	141	14116	15.0965	1.42109e-14
GOTERM_BP_ALL	GO:0042060~wound healing	21	15.9091	3.02537e-16	KNG1, F10, C9, SERPINA10, F13A1, F9, C4BPB, SERPING1, F7, PLG, F5, FGA, SAA1, GSN, FGB, KLKB1, F2, SERPINC1, APOH, SERPINA1, SERPIND1	126	191	14116	12.3176	1.38778e-14
GOTERM_BP_ALL	GO:0002376~immune system process	40	30.303	6.87559e-16	IGHG1, IGHG2, C7, YWHAZ, IGHG3, IGHG4, C9, MASP1, C3, CLU, CRP, C5, C1R, VTN, C1S, IGHM, C1QC, APOA4, CFP, AZGP1, LOC100133511, ITIH1, SAA1, PGLYRP2, CFH, C2, CFI, LBP, IGKC, MLL, C4B, CFB, IGL@, C4BPB, SERPING1, C4BPA, C8G, C8A, C1QB, C8B, IGKV1-5, IGKV3-20, IGHV4-31, CD14	126	998	14116	4.49025	2.69784e-14
GOTERM_BP_ALL	GO:0080134~regulation of response to stress	21	15.9091	3.32942e-13	KNG1, A2M, MASP1, C3, SERPING1, ADIPOQ, PLG, AHSG, AMBP, LOC100133511, SERPINF1, SAA1, SERPINF2, HPX, APOE, AGT, KLKB1, F2, APOH, SERPINC1, HRG, LBP	126	274	14116	8.58637	1.31646e-11
GOTERM_BP_ALL	GO:0050727~regulation of inflammatory response	13	9.84848	2.61183e-12	A2M, MASP1, C3, SERPING1, ADIPOQ, AHSG, LOC100133511, SERPINF1, APOE, SAA1, KLKB1, AGT, SERPINC1, LBP	126	76	14116	19.1633	1.00685e-10
GOTERM_BP_ALL	GO:0048518~positive regulation of biological process	50	37.8788	7.12204e-12	MASP1, CRP, VTN, C1QC, CFP, APOA4, APOA2, APOB, APOA1, SAA1, APOE, APOH, CFH, LBP, CFI, KNG1, F10, C4B, SERPING1, F7, C8G, C8A, C8B, C1QB, SERPINF1, SERPINF2, F2, RBP4, C7, C9, C3, C5, CLU, C1R, C1S, AHSG, LOC100133511, AGT, KLKB1, HRG, C2, HBB, MLL, CFB, C4BPB, C4BPA, ADIPOQ, PLG, HPX, PON1, CD14	126	2033	14116	2.75533	2.6786e-10
GOTERM_BP_ALL	GO:0006508~proteolysis	33	25	3.93549e-10	C7, C9, MASP1, C3, CLU, CRP, C5, C1R, HP, C1S, C1QC, CPN1, CFP, LOC100133511, KLKB1, CFH, APOH, C2, CFI, HGFAC, F10, C4B, CFB, F9, C4BPB, SERPING1, F7, C4BPA, PLG, HPR, C8G, C8A, C1QB, C8B, F2	126	1054	14116	3.50764	1.44489e-08
GOTERM_BP_ALL	GO:0031347~regulation of defense response	14	10.6061	3.96141e-10	A2M, MASP1, C3, SERPING1, ADIPOQ, AHSG, LOC100133511, SERPINF1, HPX, APOE, SAA1, KLKB1, AGT, SERPINC1, LBP	126	143	14116	10.9681	1.42058e-08
GOTERM_BP_ALL	GO:0065008~regulation of biological quality	39	29.5455	5.81493e-10	RBP4, C7, YWHAZ, C9, F13A1, HP, CPN2, APOA4, APOA2, APOB, APOA1, FGA, GSN, SERPINA6, APOE, FGB, SAA1, KLKB1, AGT, APOC3, SERPINC1, APOH, SERPINA3, SERPINA1, HBB, KNG1, SHBG, F10, F9, C4BPB, SERPING1, F7, ADIPOQ, PLG, HPR, F5, HPX, F2, CP, SERPIND1	126	1469	14116	2.97429	2.03787e-08
GOTERM_BP_ALL	GO:0042221~response to chemical stimulus	35	26.5152	3.26854e-09	RBP4, YWHAZ, A2M, CLU, ALDOB, C5, C1S, AHSG, CPN1, APOA4, APOB, APOA2, SERPINA7, FGA, BCHE, GSN, FGB, APOE, SAA1, GPX3, SERPINC1, HSPE1, SERPINA1, LBP, APCS, CFB, SELL, ATRN, ADIPOQ, C1QB, SERPINF2, PON1, CP, SERPIND1, CD14	126	1281	14116	3.06098	1.12002e-07
GOTERM_BP_ALL	GO:0032371~regulation of sterol transport	7	5.30303	1.49642e-08	APOA4, APOA2, APOA1, APOE, APOC3, PON1, ADIPOQ	126	20	14116	39.2111	5.01625e-07
GOTERM_BP_ALL	GO:0032374~regulation of cholesterol transport	7	5.30303	1.49642e-08	APOA4, APOA2, APOA1, APOE, APOC3, PON1, ADIPOQ	126	20	14116	39.2111	5.01625e-07
GOTERM_BP_ALL	GO:0051241~negative regulation of multicellular organismal process	13	9.84848	2.28975e-08	KNG1, RBP4, ADIPOQ, PLG, AHSG, APOA1, APOE, BCHE, KLKB1, APOC3, F2, APOH, LBP	126	164	14116	8.88057	7.51231e-07
GOTERM_BP_ALL	GO:0030193~regulation of blood coagulation	8	6.06061	2.43168e-08	KNG1, APOE, SERPINF2, KLKB1, F2, APOH, HRG, PLG	126	36	14116	24.8959	7.81178e-07
GOTERM_BP_ALL	GO:0034377~plasma lipoprotein particle assembly	6	4.54545	3.78656e-08	APOA4, APOA2, APOB, APOA1, APOE, APOC3	126	12	14116	56.0159	1.19161e-06
GOTERM_BP_ALL	GO:0065005~protein-lipid complex assembly	6	4.54545	3.78656e-08	APOA4, APOA2, APOB, APOA1, APOE, APOC3	126	12	14116	56.0159	1.19161e-06
GOTERM_BP_ALL	GO:0015671~oxygen transport	6	4.54545	6.10961e-08	HBG1, HBA2, HBG2, HBE1, HBB, HBD	126	13	14116	51.707	1.8842e-06
GOTERM_BP_ALL	GO:0050818~regulation of coagulation	8	6.06061	6.31326e-08	KNG1, APOE, SERPINF2, KLKB1, F2, APOH, HRG, PLG	126	41	14116	21.8599	1.90883e-06
GOTERM_BP_ALL	GO:0010873~positive regulation of cholesterol esterification	5	3.78788	2.00926e-07	APOA4, APOA2, APOA1, APOE, AGT	126	7	14116	80.0227	5.95822e-06
GOTERM_BP_ALL	GO:0034381~lipoprotein particle clearance	6	4.54545	2.02985e-07	APOA2, APOB, APOA1, APOE, APOC3, ADIPOQ	126	16	14116	42.0119	5.90569e-06
GOTERM_BP_ALL	GO:0043691~reverse cholesterol transport	6	4.54545	2.02985e-07	APOA4, APOA2, APOA1, APOE, CLU, APOC3	126	16	14116	42.0119	5.90569e-06
GOTERM_BP_ALL	GO:0032368~regulation of lipid transport	7	5.30303	2.13224e-07	APOA4, APOA2, APOA1, APOE, APOC3, PON1, ADIPOQ	126	30	14116	26.1407	6.08871e-06
GOTERM_BP_ALL	GO:0048585~negative regulation of response to stimulus	10	7.57576	2.41973e-07	AMBP, A2M, MASP1, SERPINF1, SAA1, APOE, SERPINC1, SERPING1, ADIPOQ, AHSG	126	100	14116	11.2032	6.78401e-06
GOTERM_BP_ALL	GO:0015669~gas transport	6	4.54545	3.92548e-07	HBG1, HBA2, HBG2, HBE1, HBB, HBD	126	18	14116	37.3439	1.0809e-05
GOTERM_BP_ALL	GO:0010872~regulation of cholesterol esterification	5	3.78788	3.99098e-07	APOA4, APOA2, APOA1, APOE, AGT	126	8	14116	70.0198	1.07966e-05
GOTERM_BP_ALL	GO:0031348~negative regulation of defense response	7	5.30303	6.69727e-07	A2M, SERPINF1, SAA1, APOE, SERPINC1, SERPING1, ADIPOQ	126	36	14116	21.784	1.78053e-05
GOTERM_BP_ALL	GO:0034369~plasma lipoprotein particle remodeling	6	4.54545	7.00313e-07	APOA4, APOA2, APOB, APOE, AGT, APOC3	126	20	14116	33.6095	1.83029e-05
GOTERM_BP_ALL	GO:0034368~protein-lipid complex remodeling	6	4.54545	7.00313e-07	APOA4, APOA2, APOB, APOE, AGT, APOC3	126	20	14116	33.6095	1.83029e-05
GOTERM_BP_ALL	GO:0034367~macromolecular complex remodeling	6	4.54545	7.00313e-07	APOA4, APOA2, APOB, APOE, AGT, APOC3	126	20	14116	33.6095	1.83029e-05
GOTERM_BP_ALL	GO:0051917~regulation of fibrinolysis	5	3.78788	7.13454e-07	SERPINF2, KLKB1, APOH, HRG, PLG	126	9	14116	62.2399	1.83356e-05
GOTERM_BP_ALL	GO:0030301~cholesterol transport	7	5.30303	7.93589e-07	APOA4, APOA2, APOB, APOA1, APOE, CLU, APOC3	126	37	14116	21.1952	2.00607e-05
GOTERM_BP_ALL	GO:0015918~sterol transport	7	5.30303	7.93589e-07	APOA4, APOA2, APOB, APOA1, APOE, CLU, APOC3	126	37	14116	21.1952	2.00607e-05
GOTERM_BP_ALL	GO:0002673~regulation of acute inflammatory response	6	4.54545	9.12662e-07	A2M, LOC100133511, MASP1, C3, KLKB1, SERPING1, LBP	126	21	14116	32.0091	2.26985e-05
GOTERM_BP_ALL	GO:0019835~cytolysis	6	4.54545	9.12662e-07	C8A, C8B, C7, C9, C5, C8G	126	21	14116	32.0091	2.26985e-05
GOTERM_BP_ALL	GO:0033700~phospholipid efflux	5	3.78788	1.18094e-06	APOA4, APOA2, APOA1, APOE, APOC3	126	10	14116	56.0159	2.89046e-05
GOTERM_BP_ALL	GO:0030194~positive regulation of blood coagulation	5	3.78788	1.18094e-06	SERPINF2, F2, APOH, HRG, PLG	126	10	14116	56.0159	2.89046e-05
GOTERM_BP_ALL	GO:0010033~response to organic substance	22	16.6667	1.31105e-06	RBP4, A2M, APCS, CFB, SELL, ALDOB, C1S, ADIPOQ, CPN1, AHSG, C1QB, APOA2, APOB, SERPINA7, BCHE, APOE, GSN, SERPINF2, HSPE1, SERPINA1, LBP, CD14	126	721	14116	3.41844	3.15877e-05
GOTERM_BP_ALL	GO:0030195~negative regulation of blood coagulation	6	4.54545	1.48791e-06	KNG1, APOE, KLKB1, F2, APOH, PLG	126	23	14116	29.2257	3.52972e-05
GOTERM_BP_ALL	GO:0048519~negative regulation of biological process	37	28.0303	1.62751e-06	RBP4, YWHAZ, A2M, MASP1, IGFBP6, CLU, CRP, C1QC, AHSG, APOA4, AZGP1, APOA2, APOA1, BCHE, GSN, APOE, SAA1, KLKB1, AGT, TGFBI, APOC3, SERPINC1, APOH, HRG, LBP, CSK, KNG1, MLL, SERPING1, F7, ADIPOQ, PLG, AMBP, SERPINF1, SERPINF2, F2, PON1	126	1812	14116	2.28762	3.80238e-05
GOTERM_BP_ALL	GO:0050819~negative regulation of coagulation	6	4.54545	2.84746e-06	KNG1, APOE, KLKB1, F2, APOH, PLG	126	26	14116	25.8535	6.55321e-05
GOTERM_BP_ALL	GO:0002697~regulation of immune effector process	9	6.81818	3.06433e-06	RBP4, APOA2, A2M, LOC100133511, APOA1, MASP1, C3, HPX, SERPING1, LBP	126	101	14116	9.98303	6.94858e-05
GOTERM_BP_ALL	GO:0050820~positive regulation of coagulation	5	3.78788	3.93878e-06	SERPINF2, F2, APOH, HRG, PLG	126	13	14116	43.0891	8.80195e-05
GOTERM_BP_ALL	GO:0045940~positive regulation of steroid metabolic process	5	3.78788	5.47655e-06	APOA4, APOA2, APOA1, APOE, AGT	126	14	14116	40.0113	0.000120634
GOTERM_BP_ALL	GO:0006869~lipid transport	10	7.57576	5.52291e-06	APOA4, RBP4, APOA2, APOB, APOA1, APOE, CLU, APOC3, APOH, LBP	126	145	14116	7.72633	0.000119941
GOTERM_BP_ALL	GO:0051384~response to glucocorticoid stimulus	8	6.06061	5.65816e-06	C1QB, APOA2, A2M, SERPINA7, BCHE, ALDOB, ADIPOQ, CPN1	126	78	14116	11.4904	0.000121172
GOTERM_BP_ALL	GO:0019216~regulation of lipid metabolic process	9	6.81818	6.64813e-06	APOA4, APOA2, APOB, APOA1, APOE, AGT, APOC3, SERPINA3, ADIPOQ	126	112	14116	9.00255	0.000140421
GOTERM_BP_ALL	GO:0032879~regulation of localization	19	14.3939	6.85486e-06	RBP4, F10, C3, CRP, F7, ADIPOQ, PLG, AHSG, APOA4, APOA2, APOB, APOA1, LOC100133511, SAA1, APOE, AGT, F2, APOC3, APOH, PON1	126	610	14116	3.48951	0.000142831
GOTERM_BP_ALL	GO:0051239~regulation of multicellular organismal process	24	18.1818	6.97645e-06	KNG1, RBP4, ATRN, C1QC, ADIPOQ, PLG, AHSG, APOA4, APOA2, APOA1, PTGDS, SERPINF1, SAA1, BCHE, APOE, SERPINF2, AGT, KLKB1, F2, APOC3, APOH, HRG, LBP, CD14	126	937	14116	2.86954	0.000143426
GOTERM_BP_ALL	GO:0031960~response to corticosteroid stimulus	8	6.06061	1.00437e-05	C1QB, APOA2, A2M, SERPINA7, BCHE, ALDOB, ADIPOQ, CPN1	126	85	14116	10.5442	0.000203761
GOTERM_BP_ALL	GO:0010876~lipid localization	10	7.57576	1.05416e-05	APOA4, RBP4, APOA2, APOB, APOA1, APOE, CLU, APOC3, APOH, LBP	126	157	14116	7.13578	0.000211085
GOTERM_BP_ALL	GO:0070613~regulation of protein processing	4	3.0303	1.3297e-05	A2M, MASP1, KLKB1, SERPING1	126	6	14116	74.6878	0.000262838
GOTERM_BP_ALL	GO:0051918~negative regulation of fibrinolysis	4	3.0303	1.3297e-05	SERPINF2, APOH, HRG, PLG	126	6	14116	74.6878	0.000262838
GOTERM_BP_ALL	GO:0010953~regulation of protein maturation by peptide bond cleavage	4	3.0303	1.3297e-05	A2M, MASP1, KLKB1, SERPING1	126	6	14116	74.6878	0.000262838
GOTERM_BP_ALL	GO:0019218~regulation of steroid metabolic process	6	4.54545	1.52029e-05	APOA4, APOA2, APOB, APOA1, APOE, AGT	126	36	14116	18.672	0.000296704
GOTERM_BP_ALL	GO:0042632~cholesterol homeostasis	6	4.54545	1.99572e-05	APOA4, APOA2, APOB, APOA1, APOE, APOC3	126	38	14116	17.6892	0.000384605
GOTERM_BP_ALL	GO:0055092~sterol homeostasis	6	4.54545	1.99572e-05	APOA4, APOA2, APOB, APOA1, APOE, APOC3	126	38	14116	17.6892	0.000384605
GOTERM_BP_ALL	GO:0033344~cholesterol efflux	5	3.78788	2.04905e-05	APOA4, APOA2, APOA1, APOE, APOC3	126	19	14116	29.482	0.000390006
GOTERM_BP_ALL	GO:0006641~triglyceride metabolic process	6	4.54545	3.69427e-05	APOA4, APOA2, APOB, APOE, APOC3, APOH	126	43	14116	15.6323	0.000694475
GOTERM_BP_ALL	GO:0048878~chemical homeostasis	16	12.1212	4.64235e-05	KNG1, RBP4, C7, HP, ADIPOQ, HPR, APOA4, APOA2, APOB, APOA1, SAA1, HPX, APOE, AGT, F2, APOC3, CP	126	512	14116	3.50099	0.000862119
GOTERM_BP_ALL	GO:0045834~positive regulation of lipid metabolic process	6	4.54545	5.15029e-05	APOA4, APOA2, APOA1, APOE, AGT, ADIPOQ	126	46	14116	14.6128	0.000945024
GOTERM_BP_ALL	GO:0030212~hyaluronan metabolic process	4	3.0303	5.47697e-05	ITIH1, ITIH4, ITIH2, ITIH3	126	9	14116	49.7919	0.000993121
GOTERM_BP_ALL	GO:0006639~acylglycerol metabolic process	6	4.54545	7.01438e-05	APOA4, APOA2, APOB, APOE, APOC3, APOH	126	49	14116	13.7182	0.00125695
GOTERM_BP_ALL	GO:0006638~neutral lipid metabolic process	6	4.54545	7.73889e-05	APOA4, APOA2, APOB, APOE, APOC3, APOH	126	50	14116	13.4438	0.00137076
GOTERM_BP_ALL	GO:0006662~glycerol ether metabolic process	6	4.54545	8.51968e-05	APOA4, APOA2, APOB, APOE, APOC3, APOH	126	51	14116	13.1802	0.00149183
GOTERM_BP_ALL	GO:0055088~lipid homeostasis	6	4.54545	8.51968e-05	APOA4, APOA2, APOB, APOA1, APOE, APOC3	126	51	14116	13.1802	0.00149183
GOTERM_BP_ALL	GO:0010035~response to inorganic substance	10	7.57576	8.61755e-05	APOA4, A2M, APOB, FGA, GSN, FGB, APOE, ALDOB, GPX3, SERPINA1	126	205	14116	5.46496	0.00149201
GOTERM_BP_ALL	GO:0046486~glycerolipid metabolic process	9	6.81818	9.5507e-05	APOA4, APOA2, APOB, APOA1, APOE, APOC3, GPLD1, APOH, PON1	126	162	14116	6.22399	0.00163509
GOTERM_BP_ALL	GO:0018904~organic ether metabolic process	6	4.54545	0.00010262	APOA4, APOA2, APOB, APOE, APOC3, APOH	126	53	14116	12.6828	0.00173747
GOTERM_BP_ALL	GO:0034375~high-density lipoprotein particle remodeling	4	3.0303	0.00014068	APOA4, APOA2, APOE, APOC3	126	12	14116	37.3439	0.0023553
GOTERM_BP_ALL	GO:0002920~regulation of humoral immune response	4	3.0303	0.00014068	A2M, MASP1, HPX, SERPING1	126	12	14116	37.3439	0.0023553
GOTERM_BP_ALL	GO:0050728~negative regulation of inflammatory response	5	3.78788	0.000153214	SERPINF1, SAA1, APOE, SERPINC1, ADIPOQ	126	31	14116	18.0696	0.00253735
GOTERM_BP_ALL	GO:0015914~phospholipid transport	5	3.78788	0.000196547	APOA4, APOA2, APOA1, APOE, APOC3	126	33	14116	16.9745	0.00321933
GOTERM_BP_ALL	GO:0042439~ethanolamine and derivative metabolic process	5	3.78788	0.000221235	APOA4, APOA2, APOA1, BCHE, PON1	126	34	14116	16.4753	0.00358496
GOTERM_BP_ALL	GO:0045916~negative regulation of complement activation	3	2.27273	0.000232022	A2M, MASP1, SERPING1	126	3	14116	112.032	0.00372035
GOTERM_BP_ALL	GO:0030449~regulation of complement activation	3	2.27273	0.000232022	A2M, MASP1, SERPING1	126	3	14116	112.032	0.00372035
GOTERM_BP_ALL	GO:0010903~negative regulation of very-low-density lipoprotein particle remodeling	3	2.27273	0.000232022	APOA2, APOA1, APOC3	126	3	14116	112.032	0.00372035
GOTERM_BP_ALL	GO:0007584~response to nutrient	8	6.06061	0.000244661	RBP4, A2M, BCHE, GSN, CFB, SERPINC1, CP, ADIPOQ	126	140	14116	6.40181	0.00388228
GOTERM_BP_ALL	GO:0048545~response to steroid hormone stimulus	9	6.81818	0.000306672	C1QB, APOA2, A2M, SERPINA7, BCHE, ALDOB, SERPINA1, ADIPOQ, CPN1	126	192	14116	5.25149	0.0048145
GOTERM_BP_ALL	GO:0051240~positive regulation of multicellular organismal process	10	7.57576	0.000318738	SAA1, SERPINF2, AGT, F2, APOH, HRG, LBP, PLG, CD14, AHSG	126	244	14116	4.59147	0.00495307
GOTERM_BP_ALL	GO:0042592~homeostatic process	18	13.6364	0.000330542	KNG1, RBP4, C7, HP, ADIPOQ, PLG, HPR, APOA4, APOA2, APOB, APOA1, SAA1, HPX, APOE, AGT, F2, APOC3, SERPINA3, CP	126	751	14116	2.68518	0.00508483
GOTERM_BP_ALL	GO:0031099~regeneration	6	4.54545	0.000359011	APOA2, SERPINA10, FGA, GSN, APOH, PLG	126	69	14116	9.74189	0.00546712
GOTERM_BP_ALL	GO:0031667~response to nutrient levels	9	6.81818	0.000364507	RBP4, A2M, BCHE, GSN, CFB, ALDOB, SERPINC1, CP, ADIPOQ	126	197	14116	5.1182	0.00549633
GOTERM_BP_ALL	GO:0006066~alcohol metabolic process	13	9.84848	0.000422025	RBP4, ALDOB, ADIPOQ, APOA4, LOC652797, APOA2, APOB, APOA1, APOE, BCHE, PKM2, APOC3, PON1, MDH2	126	429	14116	3.3949	0.0062995
GOTERM_BP_ALL	GO:0010955~negative regulation of protein maturation by peptide bond cleavage	3	2.27273	0.000461351	A2M, MASP1, SERPING1	126	4	14116	84.0238	0.00681863
GOTERM_BP_ALL	GO:0032488~Cdc42 protein signal transduction	3	2.27273	0.000461351	APOA1, APOE, APOC3	126	4	14116	84.0238	0.00681863
GOTERM_BP_ALL	GO:0002921~negative regulation of humoral immune response	3	2.27273	0.000461351	A2M, MASP1, SERPING1	126	4	14116	84.0238	0.00681863
GOTERM_BP_ALL	GO:0051049~regulation of transport	13	9.84848	0.000477801	RBP4, C3, ADIPOQ, AHSG, APOA4, APOA2, LOC100133511, APOA1, APOE, SAA1, AGT, APOC3, F2, PON1	126	435	14116	3.34808	0.00699395
GOTERM_BP_ALL	GO:0048523~negative regulation of cellular process	29	21.9697	0.000534664	RBP4, YWHAZ, A2M, MASP1, IGFBP6, CLU, CRP, C1QC, AHSG, APOA4, AZGP1, APOA2, APOA1, APOE, GSN, BCHE, AGT, TGFBI, APOC3, APOH, CSK, KNG1, MLL, SERPING1, F7, ADIPOQ, PLG, AMBP, PON1	126	1660	14116	1.95718	0.00774974
GOTERM_BP_ALL	GO:0046890~regulation of lipid biosynthetic process	5	3.78788	0.000659364	APOA4, APOB, APOE, AGT, APOC3	126	45	14116	12.448	0.00946034
GOTERM_BP_ALL	GO:0042157~lipoprotein metabolic process	6	4.54545	0.000710762	APOA4, APOA2, APOB, APOA1, APOE, APOC3	126	80	14116	8.40238	0.0101003
GOTERM_BP_ALL	GO:0009991~response to extracellular stimulus	9	6.81818	0.000756338	RBP4, A2M, BCHE, GSN, CFB, ALDOB, SERPINC1, CP, ADIPOQ	126	220	14116	4.58312	0.0106467
GOTERM_BP_ALL	GO:0034380~high-density lipoprotein particle assembly	3	2.27273	0.000764456	APOA2, APOA1, APOE	126	5	14116	67.219	0.0106631
GOTERM_BP_ALL	GO:0007598~blood coagulation, extrinsic pathway	3	2.27273	0.000764456	F10, F9, F7	126	5	14116	67.219	0.0106631
GOTERM_BP_ALL	GO:0010901~regulation of very-low-density lipoprotein particle remodeling	3	2.27273	0.000764456	APOA2, APOA1, APOC3	126	5	14116	67.219	0.0106631
GOTERM_BP_ALL	GO:0046470~phosphatidylcholine metabolic process	4	3.0303	0.00080235	APOA4, APOA2, APOA1, PON1	126	21	14116	21.3394	0.0110887
GOTERM_BP_ALL	GO:0032102~negative regulation of response to external stimulus	5	3.78788	0.000985045	SERPINF1, SAA1, APOE, SERPINC1, ADIPOQ	126	50	14116	11.2032	0.013477
GOTERM_BP_ALL	GO:0032268~regulation of cellular protein metabolic process	13	9.84848	0.00101407	A2M, MLL, MASP1, SERPING1, ADIPOQ, APOA4, APOA1, HPX, APOE, KLKB1, AGT, F2, PON1	126	474	14116	3.0726	0.0137496
GOTERM_BP_ALL	GO:0051345~positive regulation of hydrolase activity	8	6.06061	0.00106449	APOA4, APOA1, C9, AGT, ALDOB, F2, APOH, HSPE1	126	179	14116	5.00701	0.014303
GOTERM_BP_ALL	GO:0010875~positive regulation of cholesterol efflux	3	2.27273	0.00114004	APOE, PON1, ADIPOQ	126	6	14116	56.0159	0.0151787
GOTERM_BP_ALL	GO:0030300~regulation of intestinal cholesterol absorption	3	2.27273	0.00114004	APOA4, APOA2, APOA1	126	6	14116	56.0159	0.0151787
GOTERM_BP_ALL	GO:0034384~high-density lipoprotein particle clearance	3	2.27273	0.00114004	APOA2, APOA1, APOE	126	6	14116	56.0159	0.0151787
GOTERM_BP_ALL	GO:0030162~regulation of proteolysis	5	3.78788	0.00122717	A2M, MASP1, APOE, KLKB1, SERPING1	126	53	14116	10.569	0.0161904
GOTERM_BP_ALL	GO:0008203~cholesterol metabolic process	6	4.54545	0.00133647	APOA4, APOA2, APOB, APOA1, APOE, APOC3	126	92	14116	7.30642	0.0174714
GOTERM_BP_ALL	GO:0010743~regulation of foam cell differentiation	4	3.0303	0.00135215	APOB, AGT, CRP, ADIPOQ	126	25	14116	17.9251	0.0175262
GOTERM_BP_ALL	GO:0050777~negative regulation of immune response	4	3.0303	0.00135215	AMBP, A2M, MASP1, SERPING1	126	25	14116	17.9251	0.0175262
GOTERM_BP_ALL	GO:0010594~regulation of endothelial cell migration	4	3.0303	0.00135215	APOE, AGT, APOH, PLG	126	25	14116	17.9251	0.0175262
GOTERM_BP_ALL	GO:0030203~glycosaminoglycan metabolic process	5	3.78788	0.00140998	ITIH1, PGLYRP2, ITIH4, ITIH2, ITIH3	126	55	14116	10.1847	0.0181173
GOTERM_BP_ALL	GO:0043933~macromolecular complex subunit organization	16	12.1212	0.00151445	APCS, MLL, ALDOB, ADIPOQ, SF3B3, APOA4, APOA2, APOB, APOA1, FGA, GSN, FGB, APOE, AGT, GPX3, APOC3	126	710	14116	2.52466	0.019287
GOTERM_BP_ALL	GO:0009725~response to hormone stimulus	11	8.33333	0.00156451	C1QB, RBP4, APOA2, A2M, SERPINA7, BCHE, ALDOB, SERPINA1, ADIPOQ, CPN1, AHSG	126	367	14116	3.3579	0.0197556
GOTERM_BP_ALL	GO:0032373~positive regulation of sterol transport	3	2.27273	0.0015868	APOE, PON1, ADIPOQ	126	7	14116	48.0136	0.019872
GOTERM_BP_ALL	GO:0032376~positive regulation of cholesterol transport	3	2.27273	0.0015868	APOE, PON1, ADIPOQ	126	7	14116	48.0136	0.019872
GOTERM_BP_ALL	GO:0010874~regulation of cholesterol efflux	3	2.27273	0.0015868	APOE, PON1, ADIPOQ	126	7	14116	48.0136	0.019872
GOTERM_BP_ALL	GO:0019538~protein metabolic process	40	30.303	0.00178853	C7, C9, MASP1, C3, F13A1, CLU, CRP, C5, C1R, HP, C1S, C1QC, CPN1, CFP, APOA2, LOC100133511, KLKB1, CFH, APOH, HSPE1, C2, CFI, CSK, HGFAC, F10, APCS, C4B, CFB, F9, C4BPB, SERPING1, F7, C4BPA, PLG, HPR, C8G, AMBP, C8A, C1QB, C8B, HPX, F2	126	2812	14116	1.59362	0.0221922
GOTERM_BP_ALL	GO:0030003~cellular cation homeostasis	9	6.81818	0.00189441	KNG1, C7, SAA1, APOE, HPX, AGT, F2, HP, CP, HPR	126	254	14116	3.96963	0.0233044
GOTERM_BP_ALL	GO:0016125~sterol metabolic process	6	4.54545	0.00202105	APOA4, APOA2, APOB, APOA1, APOE, APOC3	126	101	14116	6.65535	0.0246481
GOTERM_BP_ALL	GO:0008202~steroid metabolic process	8	6.06061	0.00212898	GC, APOA4, APOA2, APOB, APOA1, SERPINA6, APOE, APOC3	126	202	14116	4.4369	0.0257453
GOTERM_BP_ALL	GO:0006629~lipid metabolic process	17	12.8788	0.00217639	GC, RBP4, CLU, GPLD1, ADIPOQ, APOA4, AZGP1, APOA2, APOB, APOA1, PTGDS, APOD, SERPINA6, APOE, APOC3, PON1, APOH	126	813	14116	2.34261	0.0261071
GOTERM_BP_ALL	GO:0065003~macromolecular complex assembly	15	11.3636	0.00225488	APCS, MLL, ALDOB, ADIPOQ, SF3B3, APOA4, APOA2, APOB, APOA1, FGA, GSN, FGB, APOE, GPX3, APOC3	126	665	14116	2.52703	0.0268284
GOTERM_BP_ALL	GO:0006022~aminoglycan metabolic process	5	3.78788	0.00261526	ITIH1, PGLYRP2, ITIH4, ITIH2, ITIH3	126	65	14116	8.61783	0.0308176
GOTERM_BP_ALL	GO:0046461~neutral lipid catabolic process	3	2.27273	0.00268883	APOA2, APOB, APOC3	126	9	14116	37.3439	0.0314321
GOTERM_BP_ALL	GO:0046464~acylglycerol catabolic process	3	2.27273	0.00268883	APOA2, APOB, APOC3	126	9	14116	37.3439	0.0314321
GOTERM_BP_ALL	GO:0034374~low-density lipoprotein particle remodeling	3	2.27273	0.00268883	APOA2, APOB, AGT	126	9	14116	37.3439	0.0314321
GOTERM_BP_ALL	GO:0034370~triglyceride-rich lipoprotein particle remodeling	3	2.27273	0.00268883	APOA4, APOA2, APOE	126	9	14116	37.3439	0.0314321
GOTERM_BP_ALL	GO:0044269~glycerol ether catabolic process	3	2.27273	0.00268883	APOA2, APOB, APOC3	126	9	14116	37.3439	0.0314321
GOTERM_BP_ALL	GO:0042246~tissue regeneration	4	3.0303	0.00278739	SERPINA10, FGA, GSN, PLG	126	32	14116	14.004	0.0323223
GOTERM_BP_ALL	GO:0030168~platelet activation	4	3.0303	0.00278739	FGA, SAA1, FGB, F2	126	32	14116	14.004	0.0323223
GOTERM_BP_ALL	GO:0065007~biological regulation	83	62.8788	0.00284403	A2M, MASP1, F13A1, CRP, IGFBP6, HP, VTN, C1QC, APOA4, CFP, AZGP1, APOB, APOA2, APOA1, GSN, SAA1, APOE, SERPINA6, TGFBI, APOH, CFH, SERPINA3, SERPINA1, CFI, LBP, ZNF408, CSK, SHBG, KNG1, F10, C4B, IGFALS, F9, SERPING1, F7, C8G, C8A, AMBP, C8B, C1QB, SERPINF1, F5, PTGDS, SERPINF2, F2, C7, RBP4, YWHAZ, C9, C3, ALDOB, CLU, C5, C1R, C1S, CPN2, AHSG, LOC100133511, FGA, BCHE, FGB, KLKB1, AGT, APOC3, SER…	126	7484	14116	1.24247	0.0327234
GOTERM_BP_ALL	GO:0009308~amine metabolic process	11	8.33333	0.00292941	APOA4, APOA2, APOA1, ITIH1, BCHE, PGLYRP2, PON1, ITIH4, HAL, ITIH2, ITIH3	126	400	14116	3.08087	0.0334414
GOTERM_BP_ALL	GO:0051336~regulation of hydrolase activity	10	7.57576	0.00306178	APOA4, APOA2, APOA1, C9, AGT, ALDOB, F2, APOC3, APOH, HSPE1	126	337	14116	3.32438	0.034672
GOTERM_BP_ALL	GO:0009719~response to endogenous stimulus	11	8.33333	0.00320106	C1QB, RBP4, APOA2, A2M, SERPINA7, BCHE, ALDOB, SERPINA1, ADIPOQ, CPN1, AHSG	126	405	14116	3.04284	0.0359594
GOTERM_BP_ALL	GO:0051246~regulation of protein metabolic process	13	9.84848	0.00329896	A2M, MLL, MASP1, SERPING1, ADIPOQ, APOA4, APOA1, HPX, APOE, KLKB1, AGT, F2, PON1	126	546	14116	2.66742	0.0367731
GOTERM_BP_ALL	GO:0051050~positive regulation of transport	8	6.06061	0.00369172	RBP4, LOC100133511, C3, SAA1, APOE, F2, PON1, ADIPOQ, AHSG	126	223	14116	4.01908	0.0407744
GOTERM_BP_ALL	GO:0055080~cation homeostasis	9	6.81818	0.00392368	KNG1, C7, SAA1, APOE, HPX, AGT, F2, HP, CP, HPR	126	286	14116	3.52547	0.0429782
GOTERM_BP_ALL	GO:0032370~positive regulation of lipid transport	3	2.27273	0.00406059	APOE, PON1, ADIPOQ	126	11	14116	30.5541	0.0441344
GOTERM_BP_ALL	GO:0044058~regulation of digestive system process	3	2.27273	0.00406059	APOA4, APOA2, APOA1	126	11	14116	30.5541	0.0441344
GOTERM_BP_ALL	GO:0016042~lipid catabolic process	7	5.30303	0.00438542	APOA4, AZGP1, APOA2, APOB, APOE, APOC3, ADIPOQ	126	173	14116	4.53308	0.0472555
GOTERM_BP_ALL	GO:0042730~fibrinolysis	3	2.27273	0.00484457	KLKB1, F2, PLG	126	12	14116	28.0079	0.0517241
GOTERM_BP_ALL	GO:0046503~glycerolipid catabolic process	3	2.27273	0.00484457	APOA2, APOB, APOC3	126	12	14116	28.0079	0.0517241
GOTERM_BP_ALL	GO:0001817~regulation of cytokine production	7	5.30303	0.00545487	APOA2, APOA1, SAA1, AGT, LBP, ADIPOQ, CD14	126	181	14116	4.33272	0.0576678
GOTERM_BP_ALL	GO:0002700~regulation of production of molecular mediator of immune response	4	3.0303	0.00565429	RBP4, APOA2, APOA1, HPX	126	41	14116	10.9299	0.0593127
GOTERM_BP_ALL	GO:0010038~response to metal ion	6	4.54545	0.00577533	APOB, FGA, GSN, FGB, ALDOB, SERPINA1	126	129	14116	5.21078	0.0601392
GOTERM_BP_ALL	GO:0006873~cellular ion homeostasis	10	7.57576	0.00602269	KNG1, C7, SAA1, APOE, HPX, AGT, F2, HP, CP, ADIPOQ, HPR	126	374	14116	2.9955	0.0622218
GOTERM_BP_ALL	GO:0003013~circulatory system process	7	5.30303	0.00621357	KNG1, F5, APOE, AGT, SERPING1, HBB, ADIPOQ	126	186	14116	4.21625	0.0637103
GOTERM_BP_ALL	GO:0008015~blood circulation	7	5.30303	0.00621357	KNG1, F5, APOE, AGT, SERPING1, HBB, ADIPOQ	126	186	14116	4.21625	0.0637103
GOTERM_BP_ALL	GO:0010596~negative regulation of endothelial cell migration	3	2.27273	0.0066028	APOE, APOH, PLG	126	14	14116	24.0068	0.0671321
GOTERM_BP_ALL	GO:0055082~cellular chemical homeostasis	10	7.57576	0.00666123	KNG1, C7, SAA1, APOE, HPX, AGT, F2, HP, CP, ADIPOQ, HPR	126	380	14116	2.9482	0.0672658
GOTERM_BP_ALL	GO:0044255~cellular lipid metabolic process	12	9.09091	0.0069964	APOA4, RBP4, APOA2, APOB, APOA1, PTGDS, APOE, APOC3, GPLD1, APOH, PON1, ADIPOQ	126	526	14116	2.55586	0.0700832
GOTERM_BP_ALL	GO:0060191~regulation of lipase activity	5	3.78788	0.00740983	APOA4, APOA2, AGT, APOC3, APOH	126	87	14116	6.43861	0.073607
GOTERM_BP_ALL	GO:0048589~developmental growth	5	3.78788	0.00740983	SHBG, SERPINA10, FGA, GSN, PLG	126	87	14116	6.43861	0.073607
GOTERM_BP_ALL	GO:0030155~regulation of cell adhesion	6	4.54545	0.00741413	KNG1, SAA1, GSN, TGFBI, VTN, ADIPOQ	126	137	14116	4.9065	0.0731788
GOTERM_BP_ALL	GO:0042304~regulation of fatty acid biosynthetic process	3	2.27273	0.00757472	APOA4, AGT, APOC3	126	15	14116	22.4063	0.0742361
GOTERM_BP_ALL	GO:0051093~negative regulation of developmental process	8	6.06061	0.00822705	RBP4, SERPINF1, CRP, APOH, C1QC, ADIPOQ, PLG, AHSG	126	259	14116	3.46044	0.0798869
GOTERM_BP_ALL	GO:0019725~cellular homeostasis	11	8.33333	0.00842352	KNG1, C7, SAA1, APOE, HPX, AGT, F2, HP, CP, ADIPOQ, HPR, PLG	126	466	14116	2.64453	0.0812138
GOTERM_BP_ALL	GO:0051129~negative regulation of cellular component organization	6	4.54545	0.00858906	APOA2, APOA1, GSN, CLU, APOC3, ADIPOQ	126	142	14116	4.73374	0.0822373
GOTERM_BP_ALL	GO:0002698~negative regulation of immune effector process	3	2.27273	0.00860697	A2M, MASP1, SERPING1	126	16	14116	21.006	0.0818962
GOTERM_BP_ALL	GO:0050764~regulation of phagocytosis	3	2.27273	0.00860697	LOC100133511, C3, ADIPOQ, AHSG	126	16	14116	21.006	0.0818962
GOTERM_BP_ALL	GO:0019217~regulation of fatty acid metabolic process	4	3.0303	0.00928489	APOA4, AGT, APOC3, ADIPOQ	126	49	14116	9.14545	0.0875472
GOTERM_BP_ALL	GO:0051004~regulation of lipoprotein lipase activity	3	2.27273	0.00969844	APOA4, APOC3, APOH	126	17	14116	19.7703	0.0907306
GOTERM_BP_ALL	GO:0050801~ion homeostasis	10	7.57576	0.0105121	KNG1, C7, SAA1, APOE, HPX, AGT, F2, HP, CP, ADIPOQ, HPR	126	409	14116	2.73916	0.0974106
GOTERM_BP_ALL	GO:0006576~biogenic amine metabolic process	5	3.78788	0.0107834	APOA4, APOA2, APOA1, BCHE, PON1	126	97	14116	5.77483	0.0992153
GOTERM_BP_ALL	GO:0010817~regulation of hormone levels	6	4.54545	0.0110184	SHBG, RBP4, YWHAZ, APOA1, SERPINA6, AGT	126	151	14116	4.45159	0.10068
GOTERM_BP_ALL	GO:0008219~cell death	14	10.6061	0.0111965	C7, MLL, C9, C5, CLU, PLG, C8G, C8A, LOC652797, C8B, GSN, PKM2, F2, HSPE1, CD14	126	719	14116	2.18142	0.101631
GOTERM_BP_ALL	GO:0050880~regulation of blood vessel size	4	3.0303	0.0115081	KNG1, APOE, AGT, HBB	126	53	14116	8.45523	0.103717
GOTERM_BP_ALL	GO:0035150~regulation of tube size	4	3.0303	0.0115081	KNG1, APOE, AGT, HBB	126	53	14116	8.45523	0.103717
GOTERM_BP_ALL	GO:0006810~transport	35	26.5152	0.0116043	GC, RBP4, YWHAZ, CLU, CRP, AHSG, APOA4, TTR, APOB, APOA2, APOA1, APOD, GSN, APOE, SERPINA6, AGT, APOC3, APOH, LBP, HBB, HBD, SHBG, KNG1, HBA2, C8G, AMBP, AFM, PTGDS, HPX, F2, HBG1, CP, HBG2, HBE1, CD14	126	2629	14116	1.49148	0.103939
GOTERM_BP_ALL	GO:0016265~death	14	10.6061	0.0118134	C7, MLL, C9, C5, CLU, PLG, C8G, C8A, LOC652797, C8B, GSN, PKM2, F2, HSPE1, CD14	126	724	14116	2.16636	0.105114
GOTERM_BP_ALL	GO:0045088~regulation of innate immune response	4	3.0303	0.0121076	A2M, HPX, SERPING1, LBP	126	54	14116	8.29865	0.106989
GOTERM_BP_ALL	GO:0051234~establishment of localization	35	26.5152	0.0134823	GC, RBP4, YWHAZ, CLU, CRP, AHSG, APOA4, TTR, APOB, APOA2, APOA1, APOD, GSN, APOE, SERPINA6, AGT, APOC3, APOH, LBP, HBB, HBD, SHBG, KNG1, HBA2, C8G, AMBP, AFM, PTGDS, HPX, F2, HBG1, CP, HBG2, HBE1, CD14	126	2656	14116	1.47632	0.117799
GOTERM_BP_ALL	GO:0001775~cell activation	8	6.06061	0.0139135	YWHAZ, FGA, ITIH1, SAA1, FGB, AGT, F2, LBP	126	287	14116	3.12284	0.120677
GOTERM_BP_ALL	GO:0010565~regulation of cellular ketone metabolic process	4	3.0303	0.0140124	APOA4, AGT, APOC3, ADIPOQ	126	57	14116	7.86188	0.120813
GOTERM_BP_ALL	GO:0045923~positive regulation of fatty acid metabolic process	3	2.27273	0.0146344	APOA4, AGT, ADIPOQ	126	21	14116	16.0045	0.125168
GOTERM_BP_ALL	GO:0050708~regulation of protein secretion	4	3.0303	0.014683	RBP4, APOA2, APOA1, SAA1	126	58	14116	7.72633	0.124873
GOTERM_BP_ALL	GO:0003018~vascular process in circulatory system	4	3.0303	0.014683	KNG1, APOE, AGT, HBB	126	58	14116	7.72633	0.124873
GOTERM_BP_ALL	GO:0008285~negative regulation of cell proliferation	9	6.81818	0.0149602	AZGP1, RBP4, MLL, APOE, AGT, IGFBP6, APOH, CSK, PLG	126	361	14116	2.79304	0.126401
GOTERM_BP_ALL	GO:0030005~cellular di-, tri-valent inorganic cation homeostasis	7	5.30303	0.0155852	KNG1, SAA1, APOE, HPX, F2, HP, CP, HPR	126	227	14116	3.45472	0.13065
GOTERM_BP_ALL	GO:0045861~negative regulation of proteolysis	3	2.27273	0.0160055	A2M, MASP1, SERPING1	126	22	14116	15.2771	0.133237
GOTERM_BP_ALL	GO:0006575~cellular amino acid derivative metabolic process	6	4.54545	0.0160441	APOA4, APOA2, APOA1, BCHE, GPX3, PON1	126	166	14116	4.04934	0.132828
GOTERM_BP_ALL	GO:0009743~response to carbohydrate stimulus	4	3.0303	0.016078	APOA2, APOB, ALDOB, ADIPOQ	126	60	14116	7.46878	0.132387
GOTERM_BP_ALL	GO:0030100~regulation of endocytosis	4	3.0303	0.0168024	LOC100133511, C3, APOC3, ADIPOQ, AHSG	126	61	14116	7.34634	0.137245
GOTERM_BP_ALL	GO:0005976~polysaccharide metabolic process	5	3.78788	0.0169684	ITIH1, PGLYRP2, ITIH4, ITIH2, ITIH3	126	111	14116	5.04648	0.137791
GOTERM_BP_ALL	GO:0030334~regulation of cell migration	6	4.54545	0.0172059	F10, APOE, AGT, APOH, F7, PLG	126	169	14116	3.97746	0.13887
GOTERM_BP_ALL	GO:0016525~negative regulation of angiogenesis	3	2.27273	0.0174294	SERPINF1, APOH, PLG	126	23	14116	14.6128	0.139833
GOTERM_BP_ALL	GO:0001868~regulation of complement activation, lectin pathway	2	1.51515	0.0176326	A2M, SERPING1	126	2	14116	112.032	0.140632
GOTERM_BP_ALL	GO:0034444~regulation of plasma lipoprotein oxidation	2	1.51515	0.0176326	APOA4, PON1	126	2	14116	112.032	0.140632
GOTERM_BP_ALL	GO:0034445~negative regulation of plasma lipoprotein oxidation	2	1.51515	0.0176326	APOA4, PON1	126	2	14116	112.032	0.140632
GOTERM_BP_ALL	GO:0001869~negative regulation of complement activation, lectin pathway	2	1.51515	0.0176326	A2M, SERPING1	126	2	14116	112.032	0.140632
GOTERM_BP_ALL	GO:0006982~response to lipid hydroperoxide	2	1.51515	0.0176326	APOA4, GPX3	126	2	14116	112.032	0.140632
GOTERM_BP_ALL	GO:0060620~regulation of cholesterol import	2	1.51515	0.0176326	APOA2, APOC3	126	2	14116	112.032	0.140632
GOTERM_BP_ALL	GO:0060621~negative regulation of cholesterol import	2	1.51515	0.0176326	APOA2, APOC3	126	2	14116	112.032	0.140632
GOTERM_BP_ALL	GO:0032103~positive regulation of response to external stimulus	4	3.0303	0.0190844	LOC100133511, C3, AGT, F7, LBP	126	64	14116	7.00198	0.150626
GOTERM_BP_ALL	GO:0045471~response to ethanol	4	3.0303	0.0190844	RBP4, GSN, APOE, ADIPOQ	126	64	14116	7.00198	0.150626
GOTERM_BP_ALL	GO:0055066~di-, tri-valent inorganic cation homeostasis	7	5.30303	0.0195722	KNG1, SAA1, APOE, HPX, F2, HP, CP, HPR	126	239	14116	3.28126	0.153424
GOTERM_BP_ALL	GO:0051128~regulation of cellular component organization	10	7.57576	0.0205409	APOA2, LOC100133511, MLL, APOA1, C3, GSN, APOE, CLU, APOC3, ADIPOQ, AHSG	126	458	14116	2.44611	0.159648
GOTERM_BP_ALL	GO:0006650~glycerophospholipid metabolic process	5	3.78788	0.0207476	APOA4, APOA2, APOA1, GPLD1, PON1	126	118	14116	4.74711	0.160336
GOTERM_BP_ALL	GO:0050994~regulation of lipid catabolic process	3	2.27273	0.0220074	APOA4, APOA2, APOC3	126	26	14116	12.9267	0.168469
GOTERM_BP_ALL	GO:0022607~cellular component assembly	15	11.3636	0.0251468	APCS, MLL, ALDOB, ADIPOQ, SF3B3, APOA4, APOA2, APOB, APOA1, FGA, GSN, FGB, APOE, GPX3, APOC3	126	887	14116	1.89456	0.189426
GOTERM_BP_ALL	GO:0045833~negative regulation of lipid metabolic process	3	2.27273	0.0253048	APOA2, APOE, APOC3	126	28	14116	12.0034	0.189597
GOTERM_BP_ALL	GO:0034443~negative regulation of lipoprotein oxidation	2	1.51515	0.0263329	APOA4, PON1	126	3	14116	74.6878	0.195651
GOTERM_BP_ALL	GO:0034442~regulation of lipoprotein oxidation	2	1.51515	0.0263329	APOA4, PON1	126	3	14116	74.6878	0.195651
GOTERM_BP_ALL	GO:0040012~regulation of locomotion	6	4.54545	0.0279924	F10, APOE, AGT, APOH, F7, PLG	126	192	14116	3.50099	0.2058
GOTERM_BP_ALL	GO:0051270~regulation of cell motion	6	4.54545	0.02854	F10, APOE, AGT, APOH, F7, PLG	126	193	14116	3.48285	0.208451
GOTERM_BP_ALL	GO:0050707~regulation of cytokine secretion	3	2.27273	0.0287893	APOA2, APOA1, SAA1	126	30	14116	11.2032	0.209119
GOTERM_BP_ALL	GO:0050729~positive regulation of inflammatory response	3	2.27273	0.0287893	LOC100133511, C3, AGT, LBP	126	30	14116	11.2032	0.209119
GOTERM_BP_ALL	GO:0044242~cellular lipid catabolic process	4	3.0303	0.029846	APOA2, APOB, APOC3, ADIPOQ	126	76	14116	5.89641	0.215014
GOTERM_BP_ALL	GO:0006875~cellular metal ion homeostasis	6	4.54545	0.0302236	KNG1, C7, SAA1, APOE, AGT, F2	126	196	14116	3.42954	0.216462
GOTERM_BP_ALL	GO:0032680~regulation of tumor necrosis factor production	3	2.27273	0.0305995	LBP, ADIPOQ, CD14	126	31	14116	10.8418	0.217883
GOTERM_BP_ALL	GO:0006879~cellular iron ion homeostasis	3	2.27273	0.0305995	HPX, HP, CP, HPR	126	31	14116	10.8418	0.217883
GOTERM_BP_ALL	GO:0019748~secondary metabolic process	4	3.0303	0.0329437	RBP4, BCHE, ALDOB, MDH2	126	79	14116	5.67249	0.231677
GOTERM_BP_ALL	GO:0048522~positive regulation of cellular process	25	18.9394	0.0332861	RBP4, C9, C3, CLU, VTN, AHSG, APOA4, APOB, APOA2, LOC100133511, APOA1, APOE, SAA1, AGT, KLKB1, LBP, HBB, KNG1, F10, MLL, F7, ADIPOQ, PLG, SERPINF1, HPX, F2	126	1847	14116	1.5164	0.232778
GOTERM_BP_ALL	GO:0051046~regulation of secretion	6	4.54545	0.0337759	RBP4, APOA2, APOA1, SAA1, AGT, ADIPOQ	126	202	14116	3.32768	0.234777
GOTERM_BP_ALL	GO:0051593~response to folic acid	2	1.51515	0.0349567	BCHE, GSN	126	4	14116	56.0159	0.240973
GOTERM_BP_ALL	GO:0002739~regulation of cytokine secretion during immune response	2	1.51515	0.0349567	APOA2, APOA1	126	4	14116	56.0159	0.240973
GOTERM_BP_ALL	GO:0051919~positive regulation of fibrinolysis	2	1.51515	0.0349567	KLKB1, PLG	126	4	14116	56.0159	0.240973
GOTERM_BP_ALL	GO:0002740~negative regulation of cytokine secretion during immune response	2	1.51515	0.0349567	APOA2, APOA1	126	4	14116	56.0159	0.240973
GOTERM_BP_ALL	GO:0031639~plasminogen activation	2	1.51515	0.0349567	KLKB1, APOH	126	4	14116	56.0159	0.240973
GOTERM_BP_ALL	GO:0045824~negative regulation of innate immune response	2	1.51515	0.0349567	A2M, SERPING1	126	4	14116	56.0159	0.240973
GOTERM_BP_ALL	GO:0070391~response to lipoteichoic acid	2	1.51515	0.0349567	LBP, CD14	126	4	14116	56.0159	0.240973
GOTERM_BP_ALL	GO:0034383~low-density lipoprotein particle clearance	2	1.51515	0.0349567	APOB, ADIPOQ	126	4	14116	56.0159	0.240973
GOTERM_BP_ALL	GO:0006642~triglyceride mobilization	2	1.51515	0.0349567	APOB, APOC3	126	4	14116	56.0159	0.240973
GOTERM_BP_ALL	GO:0044093~positive regulation of molecular function	11	8.33333	0.0352002	APOA4, APOA1, C9, APOE, AGT, ALDOB, F2, C5, APOH, PON1, HSPE1	126	586	14116	2.10298	0.241404
GOTERM_BP_ALL	GO:0055065~metal ion homeostasis	6	4.54545	0.0356456	KNG1, C7, SAA1, APOE, AGT, F2	126	205	14116	3.27898	0.243046
GOTERM_BP_ALL	GO:0050793~regulation of developmental process	12	9.09091	0.0367164	RBP4, APOB, SERPINF1, APOE, AGT, CLU, CRP, APOH, C1QC, ADIPOQ, PLG, AHSG	126	674	14116	1.99463	0.248403
GOTERM_BP_ALL	GO:0002683~negative regulation of immune system process	4	3.0303	0.0373246	AMBP, A2M, MASP1, SERPING1	126	83	14116	5.39912	0.250948
GOTERM_BP_ALL	GO:0055072~iron ion homeostasis	3	2.27273	0.0402922	HPX, HP, CP, HPR	126	36	14116	9.33598	0.267189
GOTERM_BP_ALL	GO:0043085~positive regulation of catalytic activity	10	7.57576	0.0414097	APOA4, APOA1, C9, APOE, AGT, ALDOB, F2, C5, APOH, HSPE1	126	520	14116	2.15446	0.272481
GOTERM_BP_ALL	GO:0051179~localization	36	27.2727	0.0426448	GC, RBP4, YWHAZ, CLU, CRP, AHSG, APOA4, TTR, APOB, APOA2, APOA1, APOD, GSN, APOE, SAA1, SERPINA6, AGT, APOC3, APOH, LBP, HBB, HBD, SHBG, KNG1, HBA2, C8G, AMBP, AFM, PTGDS, HPX, F2, HBG1, CP, HBG2, HBE1, CD14	126	2993	14116	1.34753	0.278355
GOTERM_BP_ALL	GO:0030853~negative regulation of granulocyte differentiation	2	1.51515	0.0435048	C1QC, ADIPOQ	126	5	14116	44.8127	0.282039
GOTERM_BP_ALL	GO:0045650~negative regulation of macrophage differentiation	2	1.51515	0.0435048	C1QC, ADIPOQ	126	5	14116	44.8127	0.282039
GOTERM_BP_ALL	GO:0006883~cellular sodium ion homeostasis	2	1.51515	0.0435048	C7, AGT	126	5	14116	44.8127	0.282039
GOTERM_BP_ALL	GO:0034382~chylomicron remnant clearance	2	1.51515	0.0435048	APOE, APOC3	126	5	14116	44.8127	0.282039
GOTERM_BP_ALL	GO:0001934~positive regulation of protein amino acid phosphorylation	4	3.0303	0.0444257	HPX, AGT, F2, ADIPOQ	126	89	14116	5.03513	0.286012
GOTERM_BP_ALL	GO:0007266~Rho protein signal transduction	3	2.27273	0.0444526	APOA1, APOE, APOC3	126	38	14116	8.84461	0.285008
GOTERM_BP_ALL	GO:0001818~negative regulation of cytokine production	3	2.27273	0.0444526	APOA1, LBP, ADIPOQ	126	38	14116	8.84461	0.285008
GOTERM_BP_ALL	GO:0001819~positive regulation of cytokine production	4	3.0303	0.0456702	SAA1, AGT, LBP, CD14	126	90	14116	4.97919	0.290539
GOTERM_BP_ALL	GO:0005975~carbohydrate metabolic process	10	7.57576	0.0457758	LOC652797, RBP4, ITIH1, PGLYRP2, PKM2, ALDOB, ITIH4, ITIH2, ITIH3, ADIPOQ, MDH2	126	530	14116	2.11381	0.289958
GOTERM_BP_ALL	GO:0006006~glucose metabolic process	5	3.78788	0.047027	LOC652797, RBP4, PKM2, ALDOB, ADIPOQ, MDH2	126	153	14116	3.66117	0.295565
GOTERM_BP_ALL	GO:0009820~alkaloid metabolic process	3	2.27273	0.0509753	BCHE, ALDOB, MDH2	126	41	14116	8.19744	0.315297
GOTERM_BP_ALL	GO:0034379~very-low-density lipoprotein particle assembly	2	1.51515	0.0519778	APOB, APOC3	126	6	14116	37.3439	0.319288
GOTERM_BP_ALL	GO:0042159~lipoprotein catabolic process	2	1.51515	0.0519778	APOB, APOE	126	6	14116	37.3439	0.319288
GOTERM_BP_ALL	GO:0030277~maintenance of gastrointestinal epithelium	2	1.51515	0.0519778	RBP4, SERPINA3	126	6	14116	37.3439	0.319288
GOTERM_BP_ALL	GO:0010896~regulation of triglyceride catabolic process	2	1.51515	0.0519778	APOA4, APOC3	126	6	14116	37.3439	0.319288
GOTERM_BP_ALL	GO:0010669~epithelial structure maintenance	2	1.51515	0.0519778	RBP4, SERPINA3	126	6	14116	37.3439	0.319288
GOTERM_BP_ALL	GO:0050748~negative regulation of lipoprotein metabolic process	2	1.51515	0.0519778	APOA4, PON1	126	6	14116	37.3439	0.319288
GOTERM_BP_ALL	GO:0008228~opsonization	2	1.51515	0.0519778	CRP, LBP	126	6	14116	37.3439	0.319288
GOTERM_BP_ALL	GO:0033194~response to hydroperoxide	2	1.51515	0.0519778	APOA4, GPX3	126	6	14116	37.3439	0.319288
GOTERM_BP_ALL	GO:0031647~regulation of protein stability	3	2.27273	0.0532215	APOA2, APOA1, CPN2	126	42	14116	8.00227	0.32446
GOTERM_BP_ALL	GO:0009894~regulation of catabolic process	4	3.0303	0.0534956	APOA4, APOA2, APOE, APOC3	126	96	14116	4.66799	0.324629
GOTERM_BP_ALL	GO:0060627~regulation of vesicle-mediated transport	4	3.0303	0.0534956	LOC100133511, C3, APOC3, ADIPOQ, AHSG	126	96	14116	4.66799	0.324629
GOTERM_BP_ALL	GO:0042327~positive regulation of phosphorylation	4	3.0303	0.0548588	HPX, AGT, F2, ADIPOQ	126	97	14116	4.61987	0.330301
GOTERM_BP_ALL	GO:0007162~negative regulation of cell adhesion	3	2.27273	0.0555024	KNG1, TGFBI, ADIPOQ	126	43	14116	7.81617	0.332293
GOTERM_BP_ALL	GO:0043623~cellular protein complex assembly	5	3.78788	0.0558227	APCS, FGA, GSN, FGB, ALDOB	126	162	14116	3.45777	0.332656
GOTERM_BP_ALL	GO:0032270~positive regulation of cellular protein metabolic process	6	4.54545	0.0561731	APOE, HPX, AGT, KLKB1, F2, ADIPOQ	126	233	14116	2.88494	0.333165
GOTERM_BP_ALL	GO:0002699~positive regulation of immune effector process	3	2.27273	0.0578173	LOC100133511, C3, HPX, LBP	126	44	14116	7.63853	0.340019
GOTERM_BP_ALL	GO:0006979~response to oxidative stress	5	3.78788	0.0578901	APOA4, APOE, CLU, GPX3, ATRN	126	164	14116	3.4156	0.339138
GOTERM_BP_ALL	GO:0045937~positive regulation of phosphate metabolic process	4	3.0303	0.0590474	HPX, AGT, F2, ADIPOQ	126	100	14116	4.48127	0.343513
GOTERM_BP_ALL	GO:0010562~positive regulation of phosphorus metabolic process	4	3.0303	0.0590474	HPX, AGT, F2, ADIPOQ	126	100	14116	4.48127	0.343513
GOTERM_BP_ALL	GO:0044085~cellular component biogenesis	15	11.3636	0.0592489	APCS, MLL, ALDOB, ADIPOQ, SF3B3, APOA4, APOA2, APOB, APOA1, FGA, GSN, FGB, APOE, GPX3, APOC3	126	1001	14116	1.6788	0.343247
GOTERM_BP_ALL	GO:0055078~sodium ion homeostasis	2	1.51515	0.0603763	C7, AGT	126	7	14116	32.0091	0.347404
GOTERM_BP_ALL	GO:0060192~negative regulation of lipase activity	2	1.51515	0.0603763	APOA2, APOC3	126	7	14116	32.0091	0.347404
GOTERM_BP_ALL	GO:0034372~very-low-density lipoprotein particle remodeling	2	1.51515	0.0603763	APOA4, APOE	126	7	14116	32.0091	0.347404
GOTERM_BP_ALL	GO:0032372~negative regulation of sterol transport	2	1.51515	0.0603763	APOA2, APOC3	126	7	14116	32.0091	0.347404
GOTERM_BP_ALL	GO:0051006~positive regulation of lipoprotein lipase activity	2	1.51515	0.0603763	APOA4, APOH	126	7	14116	32.0091	0.347404
GOTERM_BP_ALL	GO:0030852~regulation of granulocyte differentiation	2	1.51515	0.0603763	C1QC, ADIPOQ	126	7	14116	32.0091	0.347404
GOTERM_BP_ALL	GO:0032375~negative regulation of cholesterol transport	2	1.51515	0.0603763	APOA2, APOC3	126	7	14116	32.0091	0.347404
GOTERM_BP_ALL	GO:0010740~positive regulation of protein kinase cascade	5	3.78788	0.0610675	F10, HPX, AGT, F7, ADIPOQ	126	167	14116	3.35424	0.349445
GOTERM_BP_ALL	GO:0050789~regulation of biological process	73	55.303	0.0614796	A2M, MASP1, CRP, IGFBP6, VTN, C1QC, APOA4, CFP, AZGP1, APOB, APOA2, APOA1, GSN, SAA1, APOE, TGFBI, SERPINA3, APOH, CFH, CFI, LBP, ZNF408, CSK, KNG1, F10, C4B, IGFALS, SERPING1, F7, C8G, C8A, AMBP, C8B, C1QB, SERPINF1, PTGDS, SERPINF2, F2, C7, RBP4, YWHAZ, C9, C3, C5, CLU, C1R, C1S, CPN2, AHSG, LOC100133511, FGA, BCHE, FGB, AGT, KLKB1, APOC3, SERPINC1, HSPE1, HRG, C2, HBB, MLL, CFB, ATRN, C4BPB, C…	126	7106	14116	1.1509	0.350152
GOTERM_BP_ALL	GO:0030198~extracellular matrix organization	4	3.0303	0.0648596	AGT, LUM, TGFBI, VTN	126	104	14116	4.30891	0.364617
GOTERM_BP_ALL	GO:0051247~positive regulation of protein metabolic process	6	4.54545	0.0648675	APOE, HPX, AGT, KLKB1, F2, ADIPOQ	126	243	14116	2.76622	0.363394
GOTERM_BP_ALL	GO:0006096~glycolysis	3	2.27273	0.0649575	LOC652797, PKM2, ALDOB, MDH2	126	47	14116	7.15096	0.362554
GOTERM_BP_ALL	GO:0050731~positive regulation of peptidyl-tyrosine phosphorylation	3	2.27273	0.0649575	HPX, AGT, ADIPOQ	126	47	14116	7.15096	0.362554
GOTERM_BP_ALL	GO:0006909~phagocytosis	3	2.27273	0.0674003	CRP, LBP, CD14	126	48	14116	7.00198	0.372367
GOTERM_BP_ALL	GO:0051346~negative regulation of hydrolase activity	3	2.27273	0.0674003	APOA2, APOA1, APOC3	126	48	14116	7.00198	0.372367
GOTERM_BP_ALL	GO:0001932~regulation of protein amino acid phosphorylation	5	3.78788	0.0676947	APOA1, HPX, AGT, F2, ADIPOQ	126	173	14116	3.23791	0.372423
GOTERM_BP_ALL	GO:0042445~hormone metabolic process	4	3.0303	0.0678612	RBP4, APOA1, SERPINA6, AGT	126	106	14116	4.22761	0.37191
GOTERM_BP_ALL	GO:0033032~regulation of myeloid cell apoptosis	2	1.51515	0.068701	APOH, ADIPOQ	126	8	14116	28.0079	0.374387
GOTERM_BP_ALL	GO:0006734~NADH metabolic process	2	1.51515	0.068701	ALDOB, MDH2	126	8	14116	28.0079	0.374387
GOTERM_BP_ALL	GO:0050746~regulation of lipoprotein metabolic process	2	1.51515	0.068701	APOA4, PON1	126	8	14116	28.0079	0.374387
GOTERM_BP_ALL	GO:0019433~triglyceride catabolic process	2	1.51515	0.068701	APOB, APOC3	126	8	14116	28.0079	0.374387
GOTERM_BP_ALL	GO:0060341~regulation of cellular localization	6	4.54545	0.0694834	RBP4, APOA2, APOA1, SAA1, AGT, ADIPOQ	126	248	14116	2.71045	0.376586
GOTERM_BP_ALL	GO:0051258~protein polymerization	3	2.27273	0.0698733	FGA, GSN, FGB	126	49	14116	6.85909	0.377044
GOTERM_BP_ALL	GO:0009896~positive regulation of catabolic process	3	2.27273	0.0698733	APOA4, APOA2, APOE	126	49	14116	6.85909	0.377044
GOTERM_BP_ALL	GO:0010627~regulation of protein kinase cascade	6	4.54545	0.070428	AMBP, F10, HPX, AGT, F7, ADIPOQ	126	249	14116	2.69956	0.378217
GOTERM_BP_ALL	GO:0016052~carbohydrate catabolic process	4	3.0303	0.0724806	LOC652797, PGLYRP2, PKM2, ALDOB, MDH2	126	109	14116	4.11126	0.385834
GOTERM_BP_ALL	GO:0007568~aging	4	3.0303	0.074051	C1QB, SERPINA7, GSN, CP	126	110	14116	4.07388	0.391272
GOTERM_BP_ALL	GO:0032269~negative regulation of cellular protein metabolic process	5	3.78788	0.0758789	APOA4, A2M, MASP1, PON1, SERPING1	126	180	14116	3.11199	0.397707
GOTERM_BP_ALL	GO:0031638~zymogen activation	2	1.51515	0.0769525	KLKB1, APOH	126	9	14116	24.8959	0.40091
GOTERM_BP_ALL	GO:0045540~regulation of cholesterol biosynthetic process	2	1.51515	0.0769525	APOB, APOE	126	9	14116	24.8959	0.40091
GOTERM_BP_ALL	GO:0032720~negative regulation of tumor necrosis factor production	2	1.51515	0.0769525	LBP, ADIPOQ	126	9	14116	24.8959	0.40091
GOTERM_BP_ALL	GO:0019934~cGMP-mediated signaling	2	1.51515	0.0769525	APOE, AGT	126	9	14116	24.8959	0.40091
GOTERM_BP_ALL	GO:0043537~negative regulation of blood vessel endothelial cell migration	2	1.51515	0.0769525	APOE, PLG	126	9	14116	24.8959	0.40091
GOTERM_BP_ALL	GO:0040007~growth	5	3.78788	0.0795331	SHBG, SERPINA10, FGA, GSN, PLG	126	183	14116	3.06098	0.410256
GOTERM_BP_ALL	GO:0070271~protein complex biogenesis	9	6.81818	0.0796426	MLL, APCS, FGA, GSN, FGB, ALDOB, GPX3, ADIPOQ, SF3B3	126	505	14116	1.99661	0.409419
GOTERM_BP_ALL	GO:0006461~protein complex assembly	9	6.81818	0.0796426	MLL, APCS, FGA, GSN, FGB, ALDOB, GPX3, ADIPOQ, SF3B3	126	505	14116	1.99661	0.409419
GOTERM_BP_ALL	GO:0010001~glial cell differentiation	3	2.27273	0.0800528	GSN, AGT, C1S	126	53	14116	6.34142	0.409808
GOTERM_BP_ALL	GO:0051223~regulation of protein transport	4	3.0303	0.0804832	RBP4, APOA2, APOA1, SAA1	126	114	14116	3.93094	0.410276
GOTERM_BP_ALL	GO:0006919~activation of caspase activity	3	2.27273	0.082666	C9, F2, HSPE1	126	54	14116	6.22399	0.417748
GOTERM_BP_ALL	GO:0051248~negative regulation of protein metabolic process	5	3.78788	0.0845398	APOA4, A2M, MASP1, PON1, SERPING1	126	187	14116	2.9955	0.423873
GOTERM_BP_ALL	GO:0050710~negative regulation of cytokine secretion	2	1.51515	0.0851315	APOA2, APOA1	126	10	14116	22.4063	0.424907
GOTERM_BP_ALL	GO:0008211~glucocorticoid metabolic process	2	1.51515	0.0851315	APOA1, SERPINA6	126	10	14116	22.4063	0.424907
GOTERM_BP_ALL	GO:0051048~negative regulation of secretion	3	2.27273	0.0853053	APOA2, APOA1, ADIPOQ	126	55	14116	6.11082	0.424306
GOTERM_BP_ALL	GO:0006644~phospholipid metabolic process	5	3.78788	0.0883944	APOA4, APOA2, APOA1, GPLD1, PON1	126	190	14116	2.9482	0.434947
GOTERM_BP_ALL	GO:0030336~negative regulation of cell migration	3	2.27273	0.0906593	APOE, APOH, PLG	126	57	14116	5.89641	0.44225
GOTERM_BP_ALL	GO:0019318~hexose metabolic process	5	3.78788	0.0910109	LOC652797, RBP4, PKM2, ALDOB, ADIPOQ, MDH2	126	192	14116	2.91749	0.442277
GOTERM_BP_ALL	GO:0070201~regulation of establishment of protein localization	4	3.0303	0.0922988	RBP4, APOA2, APOA1, SAA1	126	121	14116	3.70353	0.445798
GOTERM_BP_ALL	GO:0009617~response to bacterium	5	3.78788	0.092333	CFP, PGLYRP2, SERPINA1, LBP, CD14	126	193	14116	2.90238	0.444636
GOTERM_BP_ALL	GO:0006519~cellular amino acid and derivative metabolic process	7	5.30303	0.0926683	APOA4, APOA2, APOA1, BCHE, GPX3, PON1, HAL	126	352	14116	2.2279	0.444596
GOTERM_BP_ALL	GO:0045649~regulation of macrophage differentiation	2	1.51515	0.0932385	C1QC, ADIPOQ	126	11	14116	20.3694	0.445423
GOTERM_BP_ALL	GO:0045723~positive regulation of fatty acid biosynthetic process	2	1.51515	0.0932385	APOA4, AGT	126	11	14116	20.3694	0.445423
GOTERM_BP_ALL	GO:0002714~positive regulation of B cell mediated immunity	2	1.51515	0.0932385	LOC100133511, C3, HPX	126	11	14116	20.3694	0.445423
GOTERM_BP_ALL	GO:0051897~positive regulation of protein kinase B signaling cascade	2	1.51515	0.0932385	F10, F7	126	11	14116	20.3694	0.445423
GOTERM_BP_ALL	GO:0002891~positive regulation of immunoglobulin mediated immune response	2	1.51515	0.0932385	LOC100133511, C3, HPX	126	11	14116	20.3694	0.445423
GOTERM_BP_ALL	GO:0006007~glucose catabolic process	3	2.27273	0.0933728	LOC652797, PKM2, ALDOB, MDH2	126	58	14116	5.79475	0.444643
GOTERM_BP_ALL	GO:0042158~lipoprotein biosynthetic process	3	2.27273	0.0933728	APOB, APOA1, APOE	126	58	14116	5.79475	0.444643
GOTERM_BP_ALL	GO:0051186~cofactor metabolic process	5	3.78788	0.0950049	AMBP, HPX, ALDOB, GPX3, MDH2	126	195	14116	2.87261	0.449337
GOTERM_BP_ALL	GO:0034754~cellular hormone metabolic process	3	2.27273	0.0961097	RBP4, APOA1, SERPINA6	126	59	14116	5.69653	0.452067
GOTERM_BP_ALL	GO:0010952~positive regulation of peptidase activity	3	2.27273	0.0961097	C9, F2, HSPE1	126	59	14116	5.69653	0.452067
GOTERM_BP_ALL	GO:0043280~positive regulation of caspase activity	3	2.27273	0.0961097	C9, F2, HSPE1	126	59	14116	5.69653	0.452067
GOTERM_BP_ALL	GO:0032501~multicellular organismal process	46	34.8485	0.0997903	RBP4, YWHAZ, SERPINA10, C9, LUM, F13A1, CLU, C5, C1S, AHSG, APOA4, APOA2, APOB, APOA1, FGA, BCHE, GSN, APOE, FGB, SAA1, KLKB1, AGT, TGFBI, APOC3, SERPINC1, APOH, SERPINA3, SERPINA1, HBB, SHBG, KNG1, F10, MLL, EFEMP1, F9, SERPING1, C4BPB, F7, ADIPOQ, PLG, C1QB, SERPINF1, F5, CLEC3B, F2, SERPIND1	126	4280	14116	1.20408	0.463928
GOTERM_BP_ALL	GO:0042981~regulation of apoptosis	12	9.09091	0.0999434	KNG1, YWHAZ, C9, APOE, AGT, F2, CLU, APOH, HSPE1, F7, ADIPOQ, PLG	126	804	14116	1.67212	0.463186

## Sheet: pic_gobp
Term	Fold Enrichment
GO:0006958~complement activation, classical pathway	73.4001
GO:0002455~humoral immune response mediated by circulating immunoglobulin	68.6646
GO:0006956~complement activation	61.3507
GO:0002541~activation of plasma proteins involved in acute inflammatory response	59.924
GO:0002526~acute inflammatory response	44.5841
GO:0016064~immunoglobulin mediated immune response	39.4186
GO:0006959~humoral immune response	32.6168
GO:0051605~protein maturation by peptide bond cleavage	32.5674
GO:0002253~activation of immune response	27.412
GO:0016485~protein processing	25.0071
GO:0051604~protein maturation	22.9573
GO:0002252~immune effector process	20.9014
GO:0045087~innate immune response	20.2956
GO:0050776~regulation of immune response	14.8715
GO:0006954~inflammatory response	14.8227
GO:0009611~response to wounding	11.8373
GO:0048583~regulation of response to stimulus	11.0827
GO:0006952~defense response	8.37961
GO:0009605~response to external stimulus	7.7221
GO:0006950~response to stress	4.3217
