# Supplementary material for: Identification of Differentially Expressed Serum Proteins in Infectious Purpura Fulminans
Source: Dis Markers. 2014 Feb 10;2014:698383. doi: 10.1155/2014/698383 (PMC3934775; doi:10.1155/2014/698383)
Supplement: Supplementary file 1 — S1: The raw result of the Spectrum Mill proteomics analysis. Supplemental materials: The MS parameters and the database search parameters setting. Table S1: The raw result of biological processes based on GO analysis by DAVID. Table S2: The raw result of molecular functions based on GO analysis by DAVID. Table S3: The raw result of cellular components based on GO analysis by DAVID. Table S4: The raw result of physiological pathways enrichment analysis by DAVID. [file 698383.f1.zip › Table S2.xls]

## Sheet: chart_gomf
Category	Term	Count	%	PValue	Genes	List Total	Pop Hits	Pop Total	Fold Enrichment	Benjamini
GOTERM_MF_ALL	GO:0004866~endopeptidase inhibitor activity	24	18.1818	3.16349e-24	A2M, PZP, SERPINA10, C3, C5, AHSG, LOC100133511, SERPINA7, ITIH1, SERPINA6, AGT, SERPINC1, ITIH4, SERPINA3, ITIH2, SERPINA1, HRG, ITIH3, KNG1, C4B, SERPING1, AMBP, SERPINF1, SERPINF2, SERPIND1	117	145	15143	21.4225	8.95269e-22
GOTERM_MF_ALL	GO:0030414~peptidase inhibitor activity	24	18.1818	1.14582e-23	A2M, PZP, SERPINA10, C3, C5, AHSG, LOC100133511, SERPINA7, ITIH1, SERPINA6, AGT, SERPINC1, ITIH4, SERPINA3, ITIH2, SERPINA1, HRG, ITIH3, KNG1, C4B, SERPING1, AMBP, SERPINF1, SERPINF2, SERPIND1	117	153	15143	20.3023	1.62134e-21
GOTERM_MF_ALL	GO:0004867~serine-type endopeptidase inhibitor activity	19	14.3939	7.52075e-21	A2M, SERPINA10, PZP, SERPING1, AMBP, SERPINF1, SERPINA7, SERPINA6, ITIH1, SERPINF2, AGT, SERPINA3, SERPINC1, ITIH4, HRG, SERPINA1, ITIH2, SERPIND1, ITIH3	117	92	15143	26.7296	7.09458e-19
GOTERM_MF_ALL	GO:0004857~enzyme inhibitor activity	26	19.697	2.24323e-20	A2M, PZP, SERPINA10, C3, C5, AHSG, APOA2, LOC100133511, SERPINA7, SERPINA6, ITIH1, AGT, APOC3, SERPINA3, ITIH4, SERPINC1, HRG, ITIH2, SERPINA1, ITIH3, KNG1, C4B, SERPING1, AMBP, SERPINF1, SERPINF2, SERPIND1	117	270	15143	12.4634	1.58709e-18
GOTERM_MF_ALL	GO:0030234~enzyme regulator activity	31	23.4848	6.71361e-13	A2M, PZP, SERPINA10, C3, C5, CPN2, AHSG, APOA4, APOA2, APOA1, LOC100133511, SERPINA7, APOE, SERPINA6, ITIH1, AGT, APOC3, SERPINC1, APOH, ITIH4, SERPINA3, ITIH2, HRG, SERPINA1, ITIH3, KNG1, C4B, SERPING1, AMBP, SERPINF1, SERPINF2, SERPIND1	117	839	15143	4.78218	3.79985e-11
GOTERM_MF_ALL	GO:0004252~serine-type endopeptidase activity	14	10.6061	1.66938e-10	F10, MASP1, CFB, F9, C1R, HP, C1S, F7, HPR, PLG, KLKB1, F2, CFI, C2, HGFAC	117	154	15143	11.7661	7.87393e-09
GOTERM_MF_ALL	GO:0008236~serine-type peptidase activity	14	10.6061	1.01187e-09	F10, MASP1, CFB, F9, C1R, HP, C1S, F7, HPR, PLG, KLKB1, F2, CFI, C2, HGFAC	117	178	15143	10.1797	4.09084e-08
GOTERM_MF_ALL	GO:0017171~serine hydrolase activity	14	10.6061	1.16116e-09	F10, MASP1, CFB, F9, C1R, HP, C1S, F7, HPR, PLG, KLKB1, F2, CFI, C2, HGFAC	117	180	15143	10.0666	4.10761e-08
GOTERM_MF_ALL	GO:0008289~lipid binding	19	14.3939	8.96251e-09	GC, SHBG, RBP4, F10, SELL, C8G, APOA4, AZGP1, APOA2, APOB, APOA1, APOD, PTGDS, SERPINA6, APOE, APOC3, PON1, APOH, LBP	117	450	15143	5.46471	2.81821e-07
GOTERM_MF_ALL	GO:0005344~oxygen transporter activity	6	4.54545	2.96399e-08	HBG1, HBA2, HBG2, HBE1, HBB, HBD	117	13	15143	59.7357	8.38809e-07
GOTERM_MF_ALL	GO:0043498~cell surface binding	7	5.30303	7.29775e-08	APOA4, FGA, FGB, CRP, APOH, LBP, ADIPOQ	117	29	15143	31.2411	1.87751e-06
GOTERM_MF_ALL	GO:0005539~glycosaminoglycan binding	11	8.33333	1.17048e-07	KNG1, APOB, APOE, SELL, PGLYRP2, APOH, SERPINC1, HRG, VTN, SERPIND1, CD14	117	140	15143	10.1693	2.76037e-06
GOTERM_MF_ALL	GO:0001871~pattern binding	11	8.33333	2.8622e-07	KNG1, APOB, APOE, SELL, PGLYRP2, APOH, SERPINC1, HRG, VTN, SERPIND1, CD14	117	154	15143	9.24481	6.23077e-06
GOTERM_MF_ALL	GO:0030247~polysaccharide binding	11	8.33333	2.8622e-07	KNG1, APOB, APOE, SELL, PGLYRP2, APOH, SERPINC1, HRG, VTN, SERPIND1, CD14	117	154	15143	9.24481	6.23077e-06
GOTERM_MF_ALL	GO:0030246~carbohydrate binding	15	11.3636	5.28296e-07	KNG1, APCS, SELL, ALDOB, ATRN, VTN, APOB, CLEC3B, APOE, PGLYRP2, SERPINC1, APOH, HRG, SERPIND1, CD14	117	354	15143	5.48421	1.06791e-05
GOTERM_MF_ALL	GO:0008201~heparin binding	9	6.81818	1.20646e-06	KNG1, APOB, APOE, SELL, APOH, SERPINC1, HRG, VTN, SERPIND1	117	103	15143	11.3092	2.27616e-05
GOTERM_MF_ALL	GO:0017127~cholesterol transporter activity	5	3.78788	1.54333e-06	APOA4, APOA2, APOB, APOA1, APOE	117	12	15143	53.9281	2.72973e-05
GOTERM_MF_ALL	GO:0015248~sterol transporter activity	5	3.78788	3.08418e-06	APOA4, APOA2, APOB, APOA1, APOE	117	14	15143	46.2241	5.13413e-05
GOTERM_MF_ALL	GO:0070325~lipoprotein receptor binding	5	3.78788	4.18086e-06	APOA2, APOB, APOA1, APOE, APOC3	117	15	15143	43.1425	6.57304e-05
GOTERM_MF_ALL	GO:0003823~antigen binding	7	5.30303	4.21573e-06	IGHG1, IGHG2, IGKV1-5, IGHG3, IGHG4, IGL@, IGKV3-20, IGHV4-31, IGKC, IGHM	117	56	15143	16.1784	6.27904e-05
GOTERM_MF_ALL	GO:0060228~phosphatidylcholine-sterol O-acyltransferase activator activity	4	3.0303	4.33148e-06	APOA4, APOA2, APOA1, APOE	117	5	15143	103.542	6.12886e-05
GOTERM_MF_ALL	GO:0004175~endopeptidase activity	14	10.6061	5.88251e-06	F10, MASP1, CFB, F9, C1R, HP, C1S, F7, HPR, PLG, KLKB1, F2, CFI, C2, HGFAC	117	375	15143	4.83195	7.92709e-05
GOTERM_MF_ALL	GO:0043499~eukaryotic cell surface binding	5	3.78788	7.20387e-06	APOA4, FGA, FGB, APOH, ADIPOQ	117	17	15143	38.0669	9.2664e-05
GOTERM_MF_ALL	GO:0019825~oxygen binding	6	4.54545	1.84547e-05	HBG1, HBA2, HBG2, HBE1, HBB, HBD	117	43	15143	18.0596	0.00022705
GOTERM_MF_ALL	GO:0008233~peptidase activity	16	12.1212	3.19566e-05	F10, MASP1, CFB, F9, C1R, HP, C1S, F7, HPR, PLG, CPN1, KLKB1, F2, SERPINA1, CFI, C2, HGFAC	117	574	15143	3.60773	0.000376757
GOTERM_MF_ALL	GO:0050997~quaternary ammonium group binding	4	3.0303	3.55774e-05	APOA4, APOA2, BCHE, CRP	117	9	15143	57.5233	0.000402663
GOTERM_MF_ALL	GO:0005543~phospholipid binding	9	6.81818	6.45934e-05	APOA4, APOA2, APOB, F10, APOA1, APOE, APOC3, APOH, PON1	117	177	15143	6.58105	0.00070285
GOTERM_MF_ALL	GO:0070011~peptidase activity, acting on L-amino acid peptides	15	11.3636	7.76781e-05	F10, MASP1, CFB, F9, C1R, HP, C1S, F7, HPR, PLG, CPN1, KLKB1, F2, CFI, C2, HGFAC	117	549	15143	3.53627	0.000813882
GOTERM_MF_ALL	GO:0005319~lipid transporter activity	6	4.54545	0.000119296	APOA4, APOA2, APOB, APOA1, APOD, APOE	117	63	15143	12.3264	0.00120509
GOTERM_MF_ALL	GO:0005496~steroid binding	6	4.54545	0.000128621	GC, SHBG, APOA2, APOA1, SERPINA6, APOC3	117	64	15143	12.1338	0.00125446
GOTERM_MF_ALL	GO:0070653~high-density lipoprotein receptor binding	3	2.27273	0.000173659	APOA2, APOA1, APOC3	117	3	15143	129.427	0.00163698
GOTERM_MF_ALL	GO:0020037~heme binding	7	5.30303	0.000333358	AMBP, HBG1, HBA2, HBG2, HBE1, HBB, HBD	117	121	15143	7.48753	0.00303911
GOTERM_MF_ALL	GO:0046906~tetrapyrrole binding	7	5.30303	0.000469554	AMBP, HBG1, HBA2, HBG2, HBE1, HBB, HBD	117	129	15143	7.02319	0.00414498
GOTERM_MF_ALL	GO:0005501~retinoid binding	4	3.0303	0.000526747	RBP4, PTGDS, APOD, C8G	117	21	15143	24.6528	0.00450825
GOTERM_MF_ALL	GO:0005515~protein binding	81	61.3636	0.00061911	IGHG1, A2M, IGHG3, PZP, MASP1, S100A8, CRP, IGFBP6, HP, VTN, IGHM, APOA4, AZGP1, TTR, APOB, APOA2, APOA1, APOD, ITIH1, GSN, APOE, SAA1, PGLYRP2, GPX3, TGFBI, APOH, SERPINA3, SERPINA1, LBP, ZNF408, CSK, SHBG, KNG1, APCS, F10, C4B, IGFALS, SERPING1, F7, AMBP, C8B, C1QB, SERPINF2, PKM2, F2, HBG1, MDH2, GC, YWHAZ, AHCY, C3, LUM, ALDOB, C5, CLU, ACAT1, SF3B3, CPN2, AHSG, LOC652797, LOC100133511, FGA, …	117	8154	15143	1.2857	0.00514152
GOTERM_MF_ALL	GO:0019840~isoprenoid binding	4	3.0303	0.000693622	RBP4, PTGDS, APOD, C8G	117	23	15143	22.5091	0.00559467
GOTERM_MF_ALL	GO:0043178~alcohol binding	4	3.0303	0.000890818	APOA4, APOA2, BCHE, CRP	117	25	15143	20.7084	0.00698146
GOTERM_MF_ALL	GO:0042803~protein homodimerization activity	10	7.57576	0.0010686	AMBP, APOA4, SHBG, C1QB, APOA2, MLL, MASP1, APOE, PON1, ADIPOQ	117	334	15143	3.87507	0.00814437
GOTERM_MF_ALL	GO:0005102~receptor binding	17	12.8788	0.00116287	KNG1, C3, C5, ADIPOQ, TTR, APOA2, APOB, APOA1, LOC100133511, FGA, SAA1, APOE, FGB, AGT, TGFBI, F2, APOC3, LBP	117	886	15143	2.48337	0.00862795
GOTERM_MF_ALL	GO:0005215~transporter activity	20	15.1515	0.00146106	GC, RBP4, HBA2, C8G, AMBP, APOA4, AZGP1, TTR, APOA2, APOB, APOA1, APOD, PTGDS, HPX, APOE, HBG1, HBG2, HBE1, HBB, HBD	117	1175	15143	2.20302	0.0105537
GOTERM_MF_ALL	GO:0008034~lipoprotein binding	4	3.0303	0.00239776	APOA2, APOA1, APOE, CRP	117	35	15143	14.7917	0.0168411
GOTERM_MF_ALL	GO:0042802~identical protein binding	13	9.84848	0.00365057	SHBG, MLL, MASP1, ALDOB, ADIPOQ, APOA4, AMBP, C1QB, APOA2, APOA1, APOE, PON1, ZNF408	117	640	15143	2.62899	0.024928
GOTERM_MF_ALL	GO:0001540~beta-amyloid binding	3	2.27273	0.00429424	APOA1, BCHE, APOE	117	13	15143	29.8679	0.0285809
GOTERM_MF_ALL	GO:0005509~calcium ion binding	16	12.1212	0.00437358	F10, APCS, MASP1, S100A8, F13A1, EFEMP1, CRP, F9, C1R, C1S, F7, PLG, F5, GSN, ITIH1, F2	117	919	15143	2.25336	0.0284353
GOTERM_MF_ALL	GO:0005488~binding	107	81.0606	0.00612591	A2M, MASP1, S100A8, F13A1, VTN, IGHM, APOA4, AZGP1, TTR, APOA2, APOB, APOA1, APOD, APOE, PGLYRP2, TGFBI, APOH, F10, C4B, F9, SERPING1, F7, C1QB, IGKV1-5, F5, SERPINF2, F2, MDH2, GC, RBP4, AHCY, ALDOB, CLU, ACAT1, AHSG, LOC652797, LOC100133511, FGA, BCHE, FGB, APOC3, HSPE1, IGKC, MLL, CFB, EFEMP1, HBA2, PON1, IGHG1, IGHG2, IGHG3, PZP, IGHG4, IGFBP6, CRP, HP, SERPINA7, GSN, SERPINA6, SAA1, ITIH1, G…	117	12531	15143	1.10516	0.0387511
GOTERM_MF_ALL	GO:0015485~cholesterol binding	3	2.27273	0.00733927	APOA2, APOA1, APOC3	117	17	15143	22.8401	0.0452694
GOTERM_MF_ALL	GO:0046983~protein dimerization activity	11	8.33333	0.00872193	AMBP, APOA4, SHBG, C1QB, APOA2, APOB, MLL, MASP1, APOE, PON1, ADIPOQ	117	542	15143	2.62675	0.0524677
GOTERM_MF_ALL	GO:0032934~sterol binding	3	2.27273	0.00913648	APOA2, APOA1, APOC3	117	19	15143	20.4359	0.0537667
GOTERM_MF_ALL	GO:0002020~protease binding	3	2.27273	0.00913648	SERPINF2, SERPINC1, SERPINA1	117	19	15143	20.4359	0.0537667
GOTERM_MF_ALL	GO:0005506~iron ion binding	8	6.06061	0.00951825	AMBP, HPX, HBG1, HBA2, HBG2, HBE1, HBB, HBD	117	308	15143	3.36175	0.0548265
GOTERM_MF_ALL	GO:0051637~Gram-positive bacterial cell surface binding	2	1.51515	0.0152624	CRP, LBP	117	2	15143	129.427	0.084997
GOTERM_MF_ALL	GO:0030492~hemoglobin binding	2	1.51515	0.0228068	HP, HBB, HPR	117	3	15143	86.2849	0.122415
GOTERM_MF_ALL	GO:0034190~apolipoprotein receptor binding	2	1.51515	0.0228068	APOA2, APOA1	117	3	15143	86.2849	0.122415
GOTERM_MF_ALL	GO:0051635~bacterial cell surface binding	2	1.51515	0.0228068	CRP, LBP	117	3	15143	86.2849	0.122415
GOTERM_MF_ALL	GO:0033265~choline binding	2	1.51515	0.0228068	BCHE, CRP	117	3	15143	86.2849	0.122415
GOTERM_MF_ALL	GO:0004869~cysteine-type endopeptidase inhibitor activity	3	2.27273	0.0325472	KNG1, HRG, AHSG	117	37	15143	10.4941	0.167739
GOTERM_MF_ALL	GO:0016019~peptidoglycan receptor activity	2	1.51515	0.0377241	PGLYRP2, CD14	117	5	15143	51.7709	0.188831
GOTERM_MF_ALL	GO:0031210~phosphatidylcholine binding	2	1.51515	0.0450979	APOA4, APOA2	117	6	15143	43.1425	0.218394
GOTERM_MF_ALL	GO:0016209~antioxidant activity	3	2.27273	0.0502952	APOA4, APOE, GPX3	117	47	15143	8.26132	0.236959
GOTERM_MF_ALL	GO:0008035~high-density lipoprotein binding	2	1.51515	0.0524156	APOA2, APOA1	117	7	15143	36.9792	0.241966
GOTERM_MF_ALL	GO:0043176~amine binding	4	3.0303	0.0524196	APOA4, APOA2, BCHE, CRP	117	110	15143	4.70645	0.238223
GOTERM_MF_ALL	GO:0042562~hormone binding	3	2.27273	0.0541822	SHBG, TTR, SERPINA7	117	49	15143	7.92412	0.241621
GOTERM_MF_ALL	GO:0001848~complement binding	2	1.51515	0.0596778	CFB, SERPING1	117	8	15143	32.3568	0.259357
GOTERM_MF_ALL	GO:0005529~sugar binding	5	3.78788	0.0629194	APCS, CLEC3B, SELL, ALDOB, ATRN	117	195	15143	3.31865	0.267808
GOTERM_MF_ALL	GO:0022892~substrate-specific transporter activity	13	9.84848	0.0661858	HBA2, APOA4, AZGP1, APOB, APOA2, APOA1, APOD, APOE, HBG1, HBG2, HBE1, HBB, HBD	117	966	15143	1.74178	0.276017
GOTERM_MF_ALL	GO:0042834~peptidoglycan binding	2	1.51515	0.0668847	PGLYRP2, CD14	117	9	15143	28.7616	0.274697
GOTERM_MF_ALL	GO:0050750~low-density lipoprotein receptor binding	2	1.51515	0.0811348	APOB, APOE	117	11	15143	23.5322	0.320386
GOTERM_MF_ALL	GO:0001530~lipopolysaccharide binding	2	1.51515	0.0881787	LBP, CD14	117	12	15143	21.5712	0.33944
GOTERM_MF_ALL	GO:0019841~retinol binding	2	1.51515	0.0881787	RBP4, C8G	117	12	15143	21.5712	0.33944
GOTERM_MF_ALL	GO:0051183~vitamin transporter activity	2	1.51515	0.0881787	GC, RBP4	117	12	15143	21.5712	0.33944
GOTERM_MF_ALL	GO:0005507~copper ion binding	3	2.27273	0.0980754	APOA4, F5, CP	117	69	15143	5.62728	0.366468

## Sheet: pic_gomf
Term	Fold Enrichment
GO:0005344~oxygen transporter activity	59.7357
GO:0017127~cholesterol transporter activity	53.9281
GO:0015248~sterol transporter activity	46.2241
GO:0070325~lipoprotein receptor binding	43.1425
GO:0043498~cell surface binding	31.2411
GO:0004867~serine-type endopeptidase inhibitor activity	26.7296
GO:0004866~endopeptidase inhibitor activity	21.4225
GO:0030414~peptidase inhibitor activity	20.3023
GO:0003823~antigen binding	16.1784
GO:0004857~enzyme inhibitor activity	12.4634
GO:0004252~serine-type endopeptidase activity	11.7661
GO:0008201~heparin binding	11.3092
GO:0008236~serine-type peptidase activity	10.1797
GO:0005539~glycosaminoglycan binding	10.1693
GO:0017171~serine hydrolase activity	10.0666
GO:0001871~pattern binding	9.24481
GO:0030247~polysaccharide binding	9.24481
GO:0030246~carbohydrate binding	5.48421
GO:0008289~lipid binding	5.46471
GO:0030234~enzyme regulator activity	4.78218
