# Supplementary material for: Identification of Differentially Expressed Serum Proteins in Infectious Purpura Fulminans
Source: Dis Markers. 2014 Feb 10;2014:698383. doi: 10.1155/2014/698383 (PMC3934775; doi:10.1155/2014/698383)
Supplement: Supplementary file 1 — S1: The raw result of the Spectrum Mill proteomics analysis. Supplemental materials: The MS parameters and the database search parameters setting. Table S1: The raw result of biological processes based on GO analysis by DAVID. Table S2: The raw result of molecular functions based on GO analysis by DAVID. Table S3: The raw result of cellular components based on GO analysis by DAVID. Table S4: The raw result of physiological pathways enrichment analysis by DAVID. [file 698383.f1.zip › Table S3.xls]

## Sheet: chart_gocc
Category	Term	Count	%	PValue	Genes	List Total	Pop Hits	Pop Total	Fold Enrichment	Benjamini
GOTERM_CC_ALL	GO:0005576~extracellular region	107	81.0606	8.79613e-74	A2M, MASP1, F13A1, VTN, IGHM, C1QC, APOA4, CFP, AZGP1, TTR, APOA2, APOB, APOA1, APOD, APOE, PGLYRP2, TGFBI, APOH, CFH, CFI, F10, C4B, F9, SERPING1, F7, C1QB, IGKV1-5, SERPINF1, F5, SERPINF2, F2, GC, RBP4, SERPINA10, CLU, AHSG, LOC100133511, FGA, BCHE, FGB, KLKB1, APOC3, IGKC, CFB, EFEMP1, PON1, IGHG1, IGHG2, IGHG3, PZP, IGHG4, IGFBP6, CRP, GPLD1, HP, CFHR3, SERPINA7, GSN, SERPINA6, SAA1, ITIH1, G…	129	2010	15908	6.56468	1.44257e-71
GOTERM_CC_ALL	GO:0044421~extracellular region part	68	51.5152	1.31444e-47	A2M, PZP, MASP1, CRP, IGFBP6, GPLD1, HP, VTN, APOA4, CFP, TTR, APOB, CFHR3, APOA2, APOA1, APOD, SERPINA7, GSN, SAA1, APOE, SERPINA6, GPX3, TGFBI, APOH, CFH, SERPINA1, CFI, LBP, KNG1, APCS, C4B, IGFALS, SAA4, SERPING1, C8A, C8B, C1QB, SERPINF1, F5, SERPINF2, F2, GC, RBP4, C3, LUM, C5, CLU, AHSG, CPN1, LOC100133511, FGA, BCHE, FGB, AGT, KLKB1, APOC3, SERPINC1, C2, HGFAC, ATRN, EFEMP1, ADIPOQ, HPR, …	129	960	15908	8.73501	7.1856e-46
GOTERM_CC_ALL	GO:0005615~extracellular space	65	49.2424	3.81989e-53	A2M, PZP, MASP1, CRP, IGFBP6, HP, VTN, APOA4, CFP, TTR, APOB, CFHR3, APOA2, APOA1, APOD, SERPINA7, GSN, SAA1, APOE, SERPINA6, GPX3, TGFBI, APOH, CFH, SERPINA1, CFI, LBP, KNG1, APCS, C4B, IGFALS, SAA4, SERPING1, C8A, C8B, C1QB, SERPINF1, F5, SERPINF2, F2, GC, RBP4, C3, C5, CLU, AHSG, CPN1, LOC100133511, FGA, BCHE, FGB, AGT, KLKB1, APOC3, SERPINC1, C2, HGFAC, ATRN, ADIPOQ, HPR, PLG, ORM1, AFM, HPX,…	129	685	15908	11.7017	3.13231e-51
GOTERM_CC_ALL	GO:0032991~macromolecular complex	36	27.2727	0.0243612	C7, YWHAZ, C9, CLU, C5, HP, SF3B3, APOA4, AZGP1, APOA2, APOB, APOA1, FGA, GSN, FGB, APOE, SAA1, APOC3, APOH, HBB, HBD, MLL, APCS, CFB, SAA4, IGFALS, HBA2, HPR, C8G, C8A, C1QB, C8B, PON1, HBG1, HBG2, HBE1, CD14	129	3155	15908	1.40711	0.155093
GOTERM_CC_ALL	GO:0000267~cell fraction	16	12.1212	0.0274508	IGHG1, IGHG2, IGHG3, YWHAZ, F10, IGHG4, HAL, IGFALS, IGHM, PLG, AMBP, APOB, FGB, BCHE, AGT, F2, GPX3, PON1, IGHV4-31	129	1083	15908	1.82187	0.166894
GOTERM_CC_ALL	GO:0016023~cytoplasmic membrane-bounded vesicle	15	11.3636	0.00013786	A2M, YWHAZ, AHCY, F13A1, CLU, SERPING1, APOB, APOA1, FGA, SERPINF1, F5, SERPINF2, FGB, SERPINA1, HRG	129	550	15908	3.36321	0.00141216
GOTERM_CC_ALL	GO:0031988~membrane-bounded vesicle	15	11.3636	0.00019252	A2M, YWHAZ, AHCY, F13A1, CLU, SERPING1, APOB, APOA1, FGA, SERPINF1, F5, SERPINF2, FGB, SERPINA1, HRG	129	568	15908	3.25663	0.00185571
GOTERM_CC_ALL	GO:0031410~cytoplasmic vesicle	15	11.3636	0.000659123	A2M, YWHAZ, AHCY, F13A1, CLU, SERPING1, APOB, APOA1, FGA, SERPINF1, F5, SERPINF2, FGB, SERPINA1, HRG	129	642	15908	2.88126	0.00567499
GOTERM_CC_ALL	GO:0031982~vesicle	15	11.3636	0.000996617	A2M, YWHAZ, AHCY, F13A1, CLU, SERPING1, APOB, APOA1, FGA, SERPINF1, F5, SERPINF2, FGB, SERPINA1, HRG	129	670	15908	2.76085	0.008143
GOTERM_CC_ALL	GO:0034358~plasma lipoprotein particle	12	9.09091	2.06265e-15	CLU, SAA4, HP, HPR, APOA4, APOB, APOA2, APOA1, APOE, SAA1, APOC3, PON1, APOH	129	35	15908	42.2804	8.64864e-14
GOTERM_CC_ALL	GO:0032994~protein-lipid complex	12	9.09091	2.06265e-15	CLU, SAA4, HP, HPR, APOA4, APOB, APOA2, APOA1, APOE, SAA1, APOC3, PON1, APOH	129	35	15908	42.2804	8.64864e-14
GOTERM_CC_ALL	GO:0034364~high-density lipoprotein particle	11	8.33333	2.32486e-15	APOA4, APOA2, APOA1, SAA1, APOE, CLU, APOC3, APOH, PON1, SAA4, HP, HPR	129	25	15908	54.2598	7.64944e-14
GOTERM_CC_ALL	GO:0031983~vesicle lumen	11	8.33333	2.54092e-12	A2M, APOB, FGA, F5, FGB, SERPINF2, F13A1, CLU, SERPING1, HRG, SERPINA1	129	46	15908	29.489	6.94531e-11
GOTERM_CC_ALL	GO:0030141~secretory granule	11	8.33333	1.91979e-06	A2M, APOA1, FGA, F5, FGB, SERPINF2, F13A1, CLU, SERPING1, HRG, SERPINA1	129	180	15908	7.53609	2.24887e-05
GOTERM_CC_ALL	GO:0044433~cytoplasmic vesicle part	11	8.33333	2.70763e-06	A2M, APOB, FGA, F5, FGB, SERPINF2, F13A1, CLU, SERPING1, HRG, SERPINA1	129	187	15908	7.25399	2.96031e-05
GOTERM_CC_ALL	GO:0031093~platelet alpha granule lumen	10	7.57576	2.99895e-11	A2M, FGA, F5, FGB, SERPINF2, F13A1, CLU, SERPING1, HRG, SERPINA1	129	41	15908	30.0775	7.0261e-10
GOTERM_CC_ALL	GO:0060205~cytoplasmic membrane-bounded vesicle lumen	10	7.57576	5.9467e-11	A2M, FGA, F5, FGB, SERPINF2, F13A1, CLU, SERPING1, HRG, SERPINA1	129	44	15908	28.0268	1.21907e-09
GOTERM_CC_ALL	GO:0031091~platelet alpha granule	10	7.57576	5.86008e-10	A2M, FGA, F5, FGB, SERPINF2, F13A1, CLU, SERPING1, HRG, SERPINA1	129	56	15908	22.021	1.06784e-08
GOTERM_CC_ALL	GO:0034361~very-low-density lipoprotein particle	7	5.30303	8.52369e-09	APOA4, APOA2, APOB, APOA1, APOE, APOC3, APOH	129	20	15908	43.1612	1.1649e-07
GOTERM_CC_ALL	GO:0034385~triglyceride-rich lipoprotein particle	7	5.30303	8.52369e-09	APOA4, APOA2, APOB, APOA1, APOE, APOC3, APOH	129	20	15908	43.1612	1.1649e-07
GOTERM_CC_ALL	GO:0005625~soluble fraction	7	5.30303	0.0409249	YWHAZ, FGB, AGT, F2, GPX3, HAL, IGFALS	129	313	15908	2.75791	0.231698
GOTERM_CC_ALL	GO:0031012~extracellular matrix	7	5.30303	0.060185	LUM, TGFBI, EFEMP1, GPLD1, SERPINA1, VTN, AHSG	129	345	15908	2.5021	0.279912
GOTERM_CC_ALL	GO:0005579~membrane attack complex	6	4.54545	6.46419e-10	C8A, C8B, C7, C9, C5, C8G	129	7	15908	105.701	1.06013e-08
GOTERM_CC_ALL	GO:0034366~spherical high-density lipoprotein particle	6	4.54545	1.71268e-09	APOA2, APOA1, CLU, APOC3, PON1, HP, HPR	129	8	15908	92.4884	2.55345e-08
GOTERM_CC_ALL	GO:0005833~hemoglobin complex	6	4.54545	2.3604e-08	HBG1, HBA2, HBG2, HBE1, HBB, HBD	129	12	15908	61.6589	2.97774e-07
GOTERM_CC_ALL	GO:0042627~chylomicron	6	4.54545	2.3604e-08	APOA4, APOA2, APOB, APOE, APOC3, APOH	129	12	15908	61.6589	2.97774e-07
GOTERM_CC_ALL	GO:0046930~pore complex	6	4.54545	0.00101329	C8A, C8B, C7, C9, C5, C8G	129	95	15908	7.78849	0.00788608
GOTERM_CC_ALL	GO:0044445~cytosolic part	6	4.54545	0.00770363	HBG1, HBA2, HBG2, HBE1, HBB, HBD	129	152	15908	4.86781	0.0536501
GOTERM_CC_ALL	GO:0005792~microsome	6	4.54545	0.0426813	AMBP, APOB, F10, PON1, IGFALS, PLG	129	237	15908	3.12197	0.232752
GOTERM_CC_ALL	GO:0042598~vesicular fraction	6	4.54545	0.0473262	AMBP, APOB, F10, PON1, IGFALS, PLG	129	244	15908	3.03241	0.247211
GOTERM_CC_ALL	GO:0005788~endoplasmic reticulum lumen	5	3.78788	0.00394706	APOA4, APOA2, APOB, APOA1, BCHE	129	80	15908	7.70736	0.0290514
GOTERM_CC_ALL	GO:0009897~external side of plasma membrane	5	3.78788	0.0485018	F10, FGA, FGB, APOE, SELL	129	170	15908	3.62699	0.245093
GOTERM_CC_ALL	GO:0034363~intermediate-density lipoprotein particle	3	2.27273	0.000381385	APOB, APOE, APOC3	129	4	15908	92.4884	0.00346947
GOTERM_CC_ALL	GO:0005577~fibrinogen complex	2	1.51515	0.0549925	FGA, FGB	129	7	15908	35.2337	0.265972
GOTERM_CC_ALL	GO:0034362~low-density lipoprotein particle	2	1.51515	0.0997334	APOB, APOE	129	13	15908	18.972	0.416351

## Sheet: pic_gocc
Term	Fold Enrichment
membrane attack complex	105.701
spherical high-density lipoprotein particle	92.4884
hemoglobin complex	61.6589
chylomicron	61.6589
high-density lipoprotein particle	54.2598
very-low-density lipoprotein particle	43.1612
triglyceride-rich lipoprotein particle	43.1612
plasma lipoprotein particle	42.2804
protein-lipid complex	42.2804
platelet alpha granule lumen	30.0775
vesicle lumen	29.489
cytoplasmic membrane-bounded vesicle lumen	28.0268
platelet alpha granule	22.021
extracellular space	11.7017
extracellular region part	8.73501
secretory granule	7.53609
cytoplasmic vesicle part	7.25399
extracellular region part	6.56468
cytoplasmic membrane-bounded vesicle lumen	3.36321
membrane-bounded vesicle	3.25663
