# Supplementary material for: Identification of Differentially Expressed Serum Proteins in Infectious Purpura Fulminans
Source: Dis Markers. 2014 Feb 10;2014:698383. doi: 10.1155/2014/698383 (PMC3934775; doi:10.1155/2014/698383)
Supplement: Supplementary file 1 — S1: The raw result of the Spectrum Mill proteomics analysis. Supplemental materials: The MS parameters and the database search parameters setting. Table S1: The raw result of biological processes based on GO analysis by DAVID. Table S2: The raw result of molecular functions based on GO analysis by DAVID. Table S3: The raw result of cellular components based on GO analysis by DAVID. Table S4: The raw result of physiological pathways enrichment analysis by DAVID. [file 698383.f1.zip › Table S4.xls]

## Sheet: chart_pathway
Category	Term	Count	%	PValue	Genes	List Total	Pop Hits	Pop Total	Fold Enrichment	Benjamini
KEGG_PATHWAY	hsa04610:Complement and coagulation cascades	36	27.2727	5.44084e-54	C7, A2M, C9, MASP1, C3, F13A1, C5, C1R, C1S, C1QC, LOC100133511, FGA, FGB, KLKB1, SERPINC1, CFH, SERPINA1, C2, CFI, KNG1, F10, C4B, CFB, F9, C4BPB, SERPING1, F7, C4BPA, PLG, C8G, C8A, C1QB, C8B, F5, SERPINF2, F2, SERPIND1	61	69	5085	43.4925	2.50279e-52
BIOCARTA	h_compPathway:Complement Pathway	11	8.33333	1.08198e-12	C8A, C7, LOC100133511, C9, MASP1, C3, CFB, C4B, C5, C1R, C1S, C2	40	17	1437	23.2456	4.4363e-11
BIOCARTA	h_classicPathway:Classical Complement Pathway	9	6.81818	6.3701e-11	C8A, C7, LOC100133511, C9, C3, C4B, C5, C1R, C1S, C2	40	12	1437	26.9438	1.30587e-09
BIOCARTA	h_alternativePathway:Alternative Complement Pathway	8	6.06061	7.03042e-10	C8A, CFP, C7, LOC100133511, C9, C3, CFB, C5, C2	40	10	1437	28.74	9.60825e-09
KEGG_PATHWAY	hsa05322:Systemic lupus erythematosus	13	9.84848	9.74901e-10	C7, C9, C3, C4B, C5, C1R, C1S, C1QC, C8G, C8A, C8B, C1QB, LOC100133511, C2	61	99	5085	10.9463	2.24227e-08
BIOCARTA	h_intrinsicPathway:Intrinsic Prothrombin Activation Pathway	9	6.81818	2.83757e-09	KNG1, F10, FGA, F5, KLKB1, F2, SERPINC1, F9, SERPING1	40	17	1437	19.0191	2.90851e-08
BIOCARTA	h_lectinPathway:Lectin Induced Complement Pathway	8	6.06061	4.45996e-09	C8A, C7, LOC100133511, C9, MASP1, C3, C4B, C5, C2	40	12	1437	23.95	3.65717e-08
KEGG_PATHWAY	hsa05020:Prion diseases	8	6.06061	1.15629e-07	C8A, C1QB, C8B, C7, C9, C5, C1QC, C8G	61	35	5085	19.0539	1.77297e-06
BIOCARTA	h_extrinsicPathway:Extrinsic Prothrombin Activation Pathway	6	4.54545	4.65294e-06	F10, FGA, F5, F2, SERPINC1, F7	40	11	1437	19.5955	3.17947e-05
BIOCARTA	h_amiPathway:Acute Myocardial Infarction	6	4.54545	1.24539e-05	F10, FGA, F2, SERPINC1, F7, PLG	40	13	1437	16.5808	7.2942e-05
BIOCARTA	h_fibrinolysisPathway:Fibrinolysis Pathway	4	3.0303	0.00262545	FGA, F13A1, F2, PLG	40	11	1437	13.0636	0.0133828
BIOCARTA	h_plateletAppPathway:Platelet Amyloid Precursor Protein Pathway	3	2.27273	0.0229138	F2, F9, PLG	40	9	1437	11.975	0.100215
KEGG_PATHWAY	hsa03320:PPAR signaling pathway	4	3.0303	0.0472538	APOA2, APOA1, APOC3, ADIPOQ	61	69	5085	4.8325	0.42689
BIOCARTA	h_LairPathway:Cells and Molecules involved in local acute inflammatory response	3	2.27273	0.0677928	C7, LOC100133511, C3, C5	40	16	1437	6.73594	0.250104
KEGG_PATHWAY	hsa00620:Pyruvate metabolism	3	2.27273	0.080267	LOC652797, PKM2, ACAT1, MDH2	61	40	5085	6.25205	0.536885

## Sheet: pic_pathway
Term	Fold Enrichment
hsa04610:Complement and coagulation cascades	43.4925
h_alternativePathway:Alternative Complement Pathway	28.74
h_classicPathway:Classical Complement Pathway	26.9438
h_lectinPathway:Lectin Induced Complement Pathway	23.95
h_compPathway:Complement Pathway	23.2456
h_extrinsicPathway:Extrinsic Prothrombin Activation Pathway	19.5955
hsa05020:Prion diseases	19.0539
h_intrinsicPathway:Intrinsic Prothrombin Activation Pathway	19.0191
h_amiPathway:Acute Myocardial Infarction	16.5808
h_fibrinolysisPathway:Fibrinolysis Pathway	13.0636
hsa05322:Systemic lupus erythematosus	10.9463
